# Supplementary material for: Intramolecular addition of benzyl anion to alkyne utilizing [1,2]-phospha-Brook rearrangement under Brønsted base catalysis
Source: Royal Society of Chemistry journal article supplement (doi:10.1039/c7ob02059g), 2017-01-01

## Electronic Supplementary Information

# Intramolecular Addition of Benzyl Anion to Alkyne Utilizing [1,2]-Phospha-Brook Rearrangement under Brønsted Base Catalysis

Azusa Kondoh,<sup>b</sup> Ryosuke Ozawa,<sup>a</sup> Takuma Aoki<sup>a</sup> and Masahiro Terada\*<sup>a</sup>

<sup>a</sup> Department of Chemistry, Graduate School of Science, Tohoku University,  
Sendai 980-8578, Japan

<sup>b</sup> Research and Analytical Center for Giant Molecules, Graduate School of Science Tohoku  
University, Sendai 980-8578, Japan

### Contents

|                                                                           |     |
|---------------------------------------------------------------------------|-----|
| General Information                                                       | S1  |
| Experimental Procedure                                                    | S2  |
| Analytical Data                                                           | S6  |
| <sup>1</sup> H NMR and <sup>13</sup> C NMR Spectra of <b>1</b> – <b>8</b> | S16 |

## General Information

Unless otherwise noted, the reactions were carried out with dried glassware under argon atmosphere.  $^1\text{H}$  NMR spectra were recorded on a JEOL JNM-ECA600 (600 MHz) spectrometer. Chemical shifts are reported in ppm from the solvent resonance or tetramethylsilane (TMS) as the internal standard ( $\text{CDCl}_3$ : 7.26 ppm, TMS: 0.00 ppm;  $\text{CD}_3\text{OD}$ : 3.31 ppm). Data are reported as follows: chemical shift, multiplicity (s = singlet, d = doublet, t = triplet, q = quartet, m = multiplet), coupling constants (Hz) and integration.  $^{13}\text{C}$  NMR spectra were recorded on a JEOL JNM-ECA600 (150 MHz) spectrometer with complete proton decoupling. Chemical shifts are reported in ppm from the solvent resonance as the internal standard ( $\text{CDCl}_3$ : 77.0 ppm;  $\text{CD}_3\text{OD}$ : 49.0 ppm).  $^{31}\text{P}$  NMR spectra were recorded on a JEOL JNM-ECA600 (243 MHz) spectrometer with complete proton decoupling. Chemical shifts are reported in ppm with 85%  $\text{H}_3\text{PO}_4$  solution as an external standard (0.0 ppm in  $\text{CDCl}_3$ ). Analytical thin layer chromatography (TLC) was performed on Merck precoated TLC plates (silica gel 60 GF<sub>254</sub>, 0.25 mm). Flash column chromatography was performed on silica gel 60N (spherical, neutral, 40-50  $\mu\text{m}$ ; Kanto Chemical Co., Inc.). High resolution mass spectra analysis was performed on a Bruker Daltonics solariX 9.4T FT-ICR-MS spectrometer at Research and Analytical Center for Giant Molecules, Graduate School of Science, Tohoku University.

**Materials:** Unless otherwise noted, materials were purchased from Wako Pure Chemical Industries, Ltd., Tokyo Chemical Industry Co., LTD., Aldrich Inc., and other commercial suppliers and were used without purification. Dichloromethane, tetrahydrofuran and toluene were supplied from Kanto Chemical Co., Inc. as “Dehydrated solvent system”. Other solvents were purchased from commercial suppliers as dehydrated solvents, and used under argon atmosphere.

## Experimental Procedure

### Procedure for Preparation of Biaryl Compounds 1.

Synthesis of **1a** is representative as shown in Scheme S1.

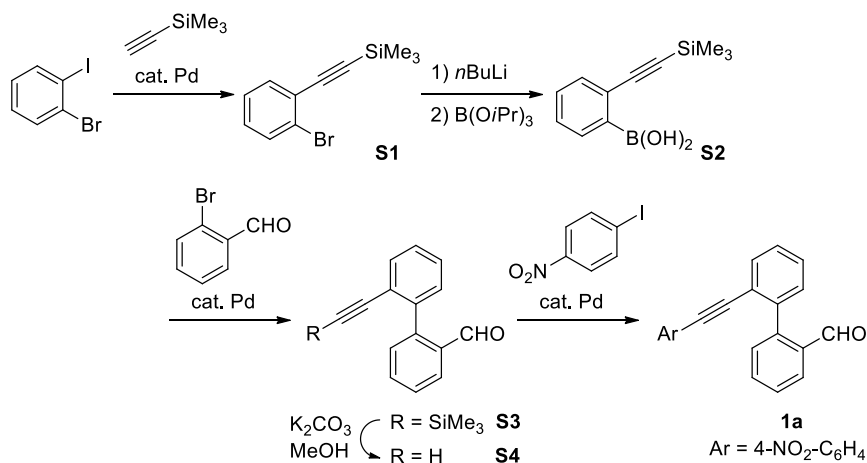

**Scheme S1.** Synthesis of **1a**

### Synthesis of S1

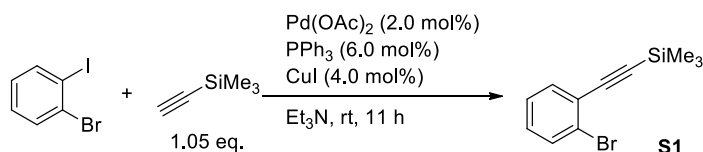

2-Bromoiodobenzene (3.8 mL, 30 mmol) and ethynyltrimethylsilane (4.4 mL, 32 mmol) were sequentially added to a solution of palladium acetate (0.13 g, 0.60 mmol), triphenylphosphine (0.47 g, 1.8 mmol) and copper iodide (0.23 g, 1.2 mmol) in Et<sub>3</sub>N (60 mL). The resulting mixture was stirred at ambient temperature for 11 h, and then sat. aq. NH<sub>4</sub>Cl was added. The product was extracted with AcOEt, and the combined organic layer was washed with brine, dried over Na<sub>2</sub>SO<sub>4</sub> and evaporated. The crude product was purified by silica gel column chromatography (hexane) afforded **S1** (7.6 g, 30 mmol, >99%) as a pale yellow oil.

### Synthesis of S2

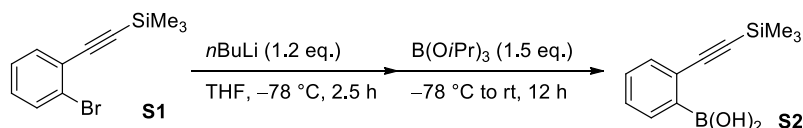

To a solution of **S1** (5.1 g, 20 mmol) in THF (40 mL) was added dropwise a solution of *n*BuLi (1.6 M in hexane, 15 mL, 24 mmol) at  $-78^\circ\text{C}$ . After stirred for 2.5 h, triisopropyl borate (6.9 mL, 30 mmol) was added to the solution in one portion at that temperature. The resulting mixture was then allowed to warm to room temperature and was stirred for 12 h. The reaction was quenched with 2N aq. HCl, and the mixture was stirred for 10 min before the extraction of the product with AcOEt. The combined organic layer was washed with brine, dried over Na<sub>2</sub>SO<sub>4</sub> and

evaporated. The crude mixture was purified by recrystallization from hexane to afford **S2** (3.0 g, 14 mmol, 70%) as a white crystal.

### Synthesis of **S3**

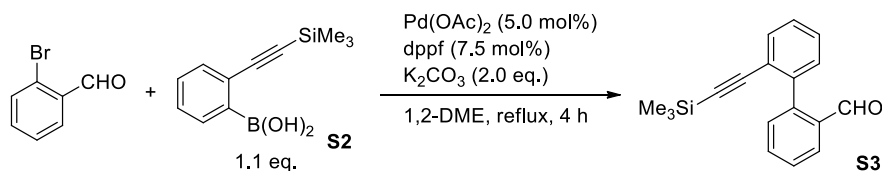

A mixture of palladium acetate (0.11 g, 0.50 mmol), DPPF (0.42 g, 0.75 mmol) and  $\text{K}_2\text{CO}_3$  (2.8 g, 20 mmol) in 1,2-DME (30.0 mL) was stirred at room temperature for 30 min. 2-Bromobenzaldehyde (1.2 mL, 10 mmol) and **S2** (2.4 g, 11 mmol) were sequentially added, and the resulting mixture was then heated at reflux for 4 h. After cooled to room temperature, the reaction was quenched with sat. aq.  $\text{NH}_4\text{Cl}$ , and the product was extracted with AcOEt. The combined organic layer was washed with brine, dried over  $\text{Na}_2\text{SO}_4$  and evaporated. The crude mixture was purified by column chromatography (hexane/AcOEt = 10:1) to yield **S3** (2.7 g, 9.8 mmol, 98%) as a yellow oil.

### Synthesis of **S4**

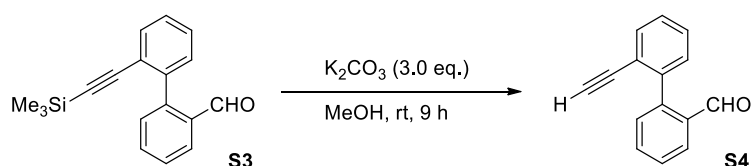

A mixture of **S3** (2.7 g, 9.8 mmol) and  $\text{K}_2\text{CO}_3$  (4.1 g, 29 mmol) in MeOH (20 mL) was stirred at room temperature for 9 h. Sat. aq.  $\text{NH}_4\text{Cl}$  was added, and the product was extracted with AcOEt. The combined organic layer was washed with brine, dried over  $\text{Na}_2\text{SO}_4$  and evaporated. The residue was purified by column chromatography (hexane/AcOEt = 10:1) to provide **S4** (1.9 g, 9.3 mmol, 95%) as a yellow oil.

### Synthesis of **1a**

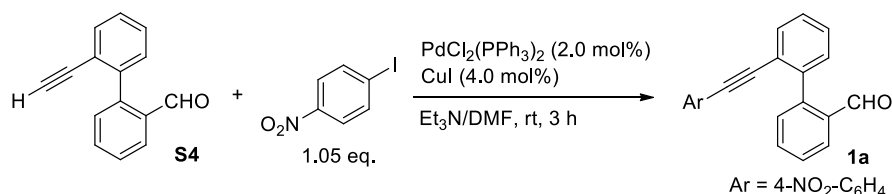

1-Iodo-4-nitrobenzene (0.52 g, 2.1 mmol) and a solution of **S4** (0.41 g, 2.0 mmol) in DMF (2.0 mL) were sequentially added to a solution of dichlorobis(triphenylphosphine)palladium (28 mg, 0.040 mmol) and copper iodide (15 mg, 0.080 mmol) in  $\text{Et}_3\text{N}$  (2.0 mL). The resulting mixture was stirred at ambient temperature for 3 h, and then sat. aq.  $\text{NH}_4\text{Cl}$  was added. The product was extracted with AcOEt, and the combined organic layer was washed with brine, dried over  $\text{Na}_2\text{SO}_4$  and evaporated. The crude product was purified by silica gel column chromatography (hexane/AcOEt = 5:1) to afford **1a** (0.47 g, 1.4 mmol, 72%) as a yellow solid.

### General Procedure for Intramolecular Cyclization Catalyzed by Phosphazene Base P2-*t*Bu.

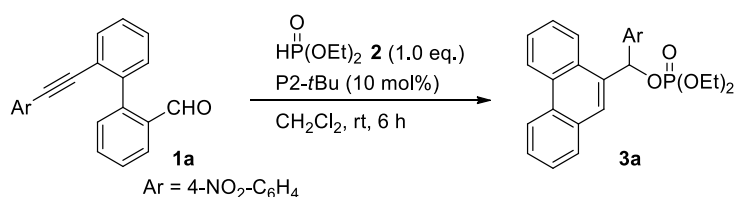

The reaction of **1a** with diethyl phosphite (**2**) is representative (Table 1, entry 15).

To a solution of **1a** (82 mg, 0.25 mmol) and diethyl phosphite (**2**) (32  $\mu$ L, 0.25 mmol) in CH<sub>2</sub>Cl<sub>2</sub> (10 mL) was added a solution of P2-*t*Bu in THF (2.0 M, 13  $\mu$ L, 0.025 mmol). The resulting mixture was then stirred at room temperature for 6 h. The reaction was quenched with sat. aq. NH<sub>4</sub>Cl, and the product was extracted with AcOEt. The combined organic layer was dried over Na<sub>2</sub>SO<sub>4</sub> and evaporated. The residue was purified by column chromatography (hexane/AcOEt = 3:2 to 1:1) to provide **4a** (99 mg, 0.21 mmol, 86%) as a yellow solid.

### Procedure for Transformation of **3a** by Friedel-Crafts Reaction (Scheme 4a).

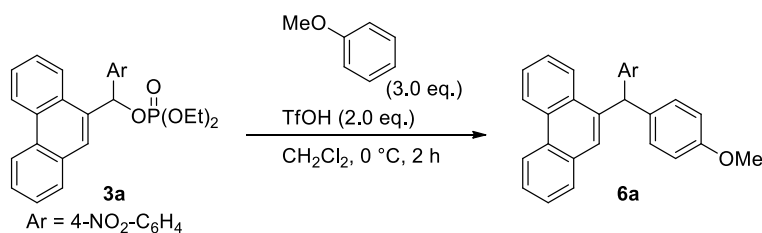

The reaction of **3a** with anisole is representative.

To a solution of **3a** (46 mg, 0.10 mmol) and anisole (33  $\mu$ L, 0.30 mmol) in CH<sub>2</sub>Cl<sub>2</sub> (1.0 mL) was added TfOH (30 mg, 0.20 mmol) at 0 °C. After stirred at that temperature for 2 h, the reaction was quenched with sat. aq. NaHCO<sub>3</sub>, and the product was extracted with AcOEt. The combined organic layer was washed with brine, dried over Na<sub>2</sub>SO<sub>4</sub> and evaporated. The crude mixture was purified by column chromatography (hexane/AcOEt = 10:1 to 5:1) to afford **6a** (37 mg, 0.088 mmol, 88%) as a white solid.

### Procedure for Transformation of **3a** by Pd-Catalyzed Cross-Coupling Reaction (Scheme 4b).

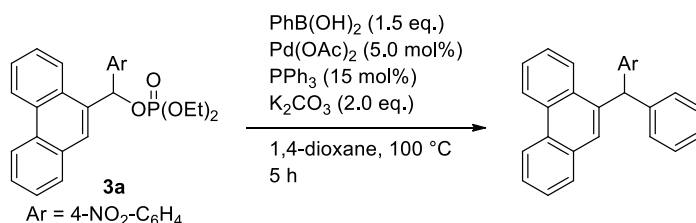

The reaction of **3a** with phenylboronic acid is representative.

A mixture of palladium acetate (1.1 mg, 5.0  $\mu$ mol), triphenylphosphine (3.9 mg, 0.015 mmol) and K<sub>2</sub>CO<sub>3</sub> (28 mg, 0.20 mmol) in 1,2-dioxane (0.50 mL) was stirred at room temperature for 30 min. A solution of **3a** (46 mg, 0.10 mmol) in 1,4-dioxane (0.50 mL) and phenylboronic acid (18 mg, 0.15 mmol) were sequentially added, and the

resulting mixture was then heated at 100 °C for 5 h. After cooled to room temperature, the reaction was quenched with sat. aq. NH<sub>4</sub>Cl, and the product was extracted with AcOEt. The combined organic layer was washed with brine, dried over Na<sub>2</sub>SO<sub>4</sub> and evaporated. The crude mixture was purified by column chromatography (hexane/AcOEt = 20:1 to 15:1) to provide **6b** (29 mg, 0.074 mmol, 74%) as a white solid.

## Analytical Data

### 2-Formyl-2'-(4-nitrophenyl)ethynyl-1,1'-biphenyl (1a) :

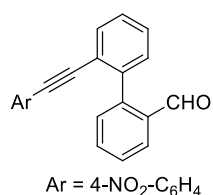

<sup>1</sup>H NMR (600 MHz, CDCl<sub>3</sub>) δ 7.28 (d, *J* = 9.0 Hz, 2H), 7.45 (dd, *J* = 7.8, 0.6 Hz, 1H), 7.46 (d, *J* = 7.8 Hz, 1H), 7.48 (ddd, *J* = 7.8, 7.8, 1.2 Hz, 1H), 7.53 (ddd, *J* = 7.8, 7.8, 1.2 Hz, 1H), 7.59 (dd, *J* = 7.8, 7.8 Hz, 1H), 7.68 (dd, *J* = 7.8, 0.6 Hz, 1H), 7.70 (ddd, *J* = 7.8, 7.8, 1.2 Hz, 1H), 8.10 (dd, *J* = 7.8, 1.2 Hz, 1H), 8.11 (d, *J* = 9.0 Hz, 2H), 9.92 (s, 1H); <sup>13</sup>C NMR (150 MHz, CDCl<sub>3</sub>) δ 91.6, 93.3, 122.6, 123.5, 127.0, 128.4, 128.5, 129.5, 130.3, 131.2, 131.9, 132.2, 133.6 (2C), 134.2, 140.8, 143.8, 147.0, 191.6; IR (ATR): 2843, 2755, 2217, 1695, 1596, 1519, 1343, 1198, 1107 cm<sup>-1</sup>; HRMS (ESI) Calcd for C<sub>21</sub>H<sub>13</sub>NO<sub>3</sub> [M+Na]<sup>+</sup> 350.0788, Found 350.0788.

### 5-Fluoro-2-formyl-2'-(4-nitrophenyl)ethynyl-1,1'-biphenyl (1b):

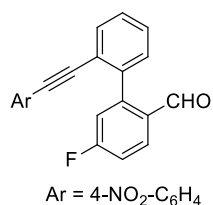

<sup>1</sup>H NMR (600 MHz, CDCl<sub>3</sub>) δ 7.15 (dd, *J* = 9.0, 2.4 Hz, 1H), 7.24-7.29 (m, 1H), 7.32 (d, *J* = 8.4 Hz, 2H), 7.45 (d, *J* = 7.8 Hz, 1H), 7.51 (ddd, *J* = 7.8, 7.8, 1.8 Hz, 1H), 7.54 (ddd, *J* = 7.8, 7.8, 1.8 Hz, 1H), 7.69 (d, *J* = 7.8 Hz, 1H), 8.11-8.15 (m, 1H), 8.13 (d, *J* = 8.4 Hz, 2H), 9.83 (s, 1H); <sup>13</sup>C NMR (150 MHz, CDCl<sub>3</sub>) δ 91.9, 92.7, 115.9 (d, *J* = 23.1 Hz), 118.1 (d, *J* = 23.1 Hz), 122.4, 123.6, 128.9, 129.3, 129.6, 129.9 (d, *J* = 10.1 Hz), 130.1, 130.8, 131.9, 132.4, 139.4, 146.5 (d, *J* = 8.6 Hz), 147.1, 165.6 (d, *J* = 254.3 Hz), 189.9; IR (ATR): 3078, 2849, 2758, 2218, 1693, 1597, 1578, 1518, 1343, 1191, 1107 cm<sup>-1</sup>; HRMS (ESI) Calcd for C<sub>21</sub>H<sub>12</sub>FNO<sub>3</sub> [M+Na]<sup>+</sup> 368.0693, Found 368.0693.

### 2-Formyl-5-methoxy-2'-(4-nitrophenyl)ethynyl-1,1'-biphenyl (1c):

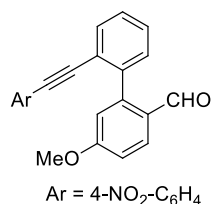

<sup>1</sup>H NMR (600 MHz, CDCl<sub>3</sub>) δ 3.91 (s, 3H), 6.89 (d, *J* = 2.4 Hz, 1H), 7.08 (dd, *J* = 8.4, 2.4 Hz, 1H), 7.31 (d, *J* = 9.0 Hz, 2H), 7.46 (dd, *J* = 7.2, 1.2 Hz, 1H), 7.48 (ddd, *J* = 7.8, 7.2, 1.2 Hz, 1H), 7.52 (ddd, *J* = 7.2, 7.2, 1.2 Hz, 1H), 7.67 (dd, *J* = 7.8, 1.2 Hz, 1H), 8.08 (d, *J* = 8.4 Hz, 1H), 8.12 (d, *J* = 9.0 Hz, 2H), 9.77 (s, 1H); <sup>13</sup>C NMR (150 MHz, CDCl<sub>3</sub>) δ 55.7, 91.6, 93.2, 114.3, 115.9, 122.5, 123.5, 127.8, 128.4, 129.4, 129.5, 129.6, 130.2, 131.9, 132.2, 140.8, 146.1, 147.0, 163.6, 190.3; IR (ATR): 2973, 2916, 2841, 2760, 2218, 1684, 1594, 1517, 1342, 1238, 1091, 933 cm<sup>-1</sup>; HRMS (ESI) Calcd for C<sub>22</sub>H<sub>15</sub>NO<sub>4</sub> [M+Na]<sup>+</sup> 380.0893, Found 380.0894.

### 2-Formyl-4-methoxy-2'-(4-nitrophenyl)ethynyl-1,1'-biphenyl (1d):

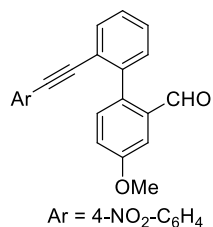

<sup>1</sup>H NMR (600 MHz, CDCl<sub>3</sub>) δ 3.94 (s, 3H), 7.25 (dd, *J* = 8.4, 3.0 Hz, 1H), 7.33 (d, *J* = 9.0 Hz, 2H), 7.38 (d, *J* = 8.4 Hz, 1H), 7.42 (dd, *J* = 7.8, 0.6 Hz, 1H), 7.45 (ddd, *J* = 7.8, 7.8, 1.2 Hz, 1H), 7.51 (ddd, *J* = 7.8, 7.8, 1.2 Hz, 1H), 7.58 (d, *J* = 3.0 Hz, 1H), 7.67 (dd, *J* = 7.8, 0.6 Hz, 1H), 8.13 (d, *J* = 9.0 Hz, 2H), 9.88 (s, 1H); <sup>13</sup>C NMR (150 MHz, CDCl<sub>3</sub>) δ 55.7, 91.5, 93.5, 109.6, 121.0, 122.8, 123.5, 128.1, 129.5, 129.6, 130.7, 132.0, 132.3, 132.6, 135.1, 136.7, 140.5, 147.0, 159.6, 191.5; IR (ATR): 3077, 2940, 2847, 2752, 2217, 1691, 1597, 1519, 1472, 1343, 1279, 1164 cm<sup>-1</sup>; HRMS (ESI) Calcd for C<sub>22</sub>H<sub>15</sub>NO<sub>4</sub> [M+Na]<sup>+</sup> 380.0893, Found 380.0893.

**3-Chloro-2-formyl-2'-(4-nitrophenyl)ethynyl-1,1'-biphenyl (1e):**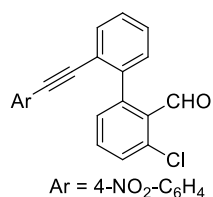

$^1\text{H}$  NMR (600 MHz,  $\text{CDCl}_3$ )  $\delta$  7.31 (dd,  $J = 4.2, 4.2$  Hz, 1H), 7.34 (d,  $J = 9.0$  Hz, 2H), 7.37 (dd,  $J = 7.8, 1.2$  Hz, 1H), 7.45 (ddd,  $J = 7.8, 7.8, 1.2$  Hz, 1H), 7.50 (ddd,  $J = 7.8, 7.8, 1.2$  Hz, 1H), 7.54-7.58 (m, 2H), 7.63 (dd,  $J = 7.8, 1.2$  Hz, 1H), 8.15 (d,  $J = 9.0$  Hz, 2H), 10.2 (s, 1H);  $^{13}\text{C}$  NMR (150 MHz,  $\text{CDCl}_3$ )  $\delta$  91.7, 93.4, 121.4, 123.6, 128.2, 129.4, 129.5, 130.1, 130.6, 131.7, 131.9, 132.0, 132.2, 133.0, 135.3, 141.7, 144.1, 147.0, 190.0; IR (ATR): 3109, 3068, 2851, 2763, 2217, 1704, 1594  $\text{cm}^{-1}$ ; HRMS (ESI) Calcd for  $\text{C}_{21}\text{H}_{12}\text{ClNO}_3$   $[\text{M}+\text{Na}]^+$  384.0398, Found 384.0398.

**5'-Chloro-2-formyl-2'-(4-nitrophenyl)ethynyl-1,1'-biphenyl (1f):**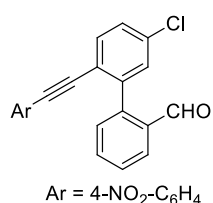

$^1\text{H}$  NMR (600 MHz,  $\text{CDCl}_3$ )  $\delta$  7.27 (d,  $J = 8.4$  Hz, 2H), 7.42 (d,  $J = 7.8$  Hz, 1H), 7.47 (s, 1H), 7.45-7.48 (m, 1H), 7.60 (d,  $J = 7.8$  Hz, 1H), 7.61 (dd,  $J = 7.8, 7.8$  Hz, 1H), 7.72 (dd,  $J = 7.8, 7.8$  Hz, 1H), 8.10 (d,  $J = 7.8$  Hz, 1H), 8.11 (d,  $J = 8.4$  Hz, 2H), 9.92 (s, 1H);  $^{13}\text{C}$  NMR (150 MHz,  $\text{CDCl}_3$ )  $\delta$  92.1, 92.4, 121.2, 123.6, 127.3, 128.7, 129.0, 129.1, 130.3, 131.0, 131.9, 133.2, 133.8, 134.1, 135.6, 142.2, 142.5, 147.1, 191.1; IR (ATR): 2985, 2917, 2845, 2215, 1697, 1596, 1519, 1343, 1236  $\text{cm}^{-1}$ ; HRMS (ESI) Calcd for  $\text{C}_{21}\text{H}_{12}\text{ClNO}_3$   $[\text{M}+\text{Na}]^+$  384.0398, Found 384.0398.

**2-Formyl-2'-(4-nitrophenyl)ethynyl-5'-trifluoromethyl-1,1'-biphenyl (1g):**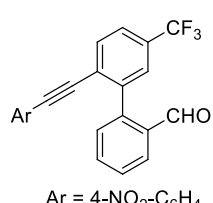

$^1\text{H}$  NMR (600 MHz,  $\text{CDCl}_3$ )  $\delta$  7.30 (d,  $J = 8.4$  Hz, 2H), 7.44 (d,  $J = 7.2$  Hz, 1H), 7.64 (dd,  $J = 7.2, 7.2$  Hz, 1H), 7.72-7.76 (m, 3H), 7.79 (d,  $J = 7.8$  Hz, 1H), 8.11 (d,  $J = 7.8$  Hz, 1H), 8.13 (d,  $J = 8.4$  Hz, 2H), 9.91 (s, 1H);  $^{13}\text{C}$  NMR (150 MHz,  $\text{CDCl}_3$ )  $\delta$  91.6, 93.6, 123.5 (q,  $J = 271.5$  Hz), 123.6, 125.1, 126.3, 126.9, 127.6, 128.6, 129.2, 131.1, 131.2 (q,  $J = 31.7$  Hz), 132.1, 132.5, 133.9, 134.1, 141.7, 142.0, 147.4, 190.9; IR (ATR): 2848, 2754, 2223, 1697, 1612, 1596, 1520, 1173, 1125  $\text{cm}^{-1}$ ; HRMS (ESI) Calcd for  $\text{C}_{22}\text{H}_{12}\text{F}_3\text{NO}_3$   $[\text{M}+\text{Na}]^+$  418.0662, Found 418.0661.

**4',5'-Dioxymethylene-2-formyl-2'-(4-Nitrophenyl)ethynyl-1,1'-biphenyl (1h):**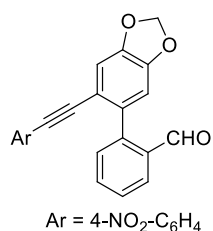

$^1\text{H}$  NMR (600 MHz,  $\text{CDCl}_3$ )  $\delta$  6.11 (s, 2H), 6.91 (s, 1H), 7.08 (s, 1H), 7.22 (d,  $J = 8.4$  Hz, 2H), 7.40 (dd,  $J = 7.8, 0.6$  Hz, 1H), 7.57 (ddd,  $J = 7.8, 7.8, 0.6$  Hz, 1H), 7.68 (ddd,  $J = 7.8, 7.8, 1.2$  Hz, 1H), 8.07 (dd,  $J = 7.8, 1.2$  Hz, 1H), 8.09 (d,  $J = 8.4$  Hz, 2H), 9.95 (s, 1H);  $^{13}\text{C}$  NMR (150 MHz,  $\text{CDCl}_3$ )  $\delta$  90.3, 93.7, 102.1, 110.5, 111.3, 115.9, 123.5, 127.0, 128.4, 129.7, 131.3, 131.6, 133.6, 134.5, 136.1, 143.5, 146.8, 147.7, 149.1, 191.6; IR (ATR): 2900, 2845, 2207, 1693, 1593, 1516, 1475, 1340, 1223, 1036  $\text{cm}^{-1}$ ; HRMS (ESI) Calcd for  $\text{C}_{22}\text{H}_{13}\text{NO}_5$   $[\text{M}+\text{Na}]^+$  394.0686, Found 394.0686.

**2-Formyl-1-[2-(4-nitrophenyl)ethynyl]phenylnaphthalene (1i):**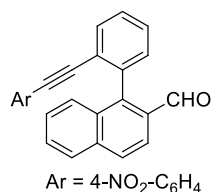

$^1\text{H}$  NMR (600 MHz,  $\text{CDCl}_3$ )  $\delta$  6.89 (d,  $J = 9.0$  Hz, 2H), 7.48 (ddd,  $J = 7.8, 6.6, 1.2$  Hz, 1H), 7.51 (dd,  $J = 6.6, 2.4$  Hz, 1H), 7.57-7.62 (m, 3H), 7.64 (ddd,  $J = 7.8, 6.6, 1.2$  Hz, 1H), 7.77 (dd,  $J = 6.6, 2.4$  Hz, 1H), 7.96-8.00 (m, 3H), 8.02 (d,  $J = 8.4$  Hz, 1H), 8.13 (d,  $J = 9.0$  Hz, 1H), 9.90 (s, 1H);  $^{13}\text{C}$  NMR (150 MHz,  $\text{CDCl}_3$ )  $\delta$  92.1, 92.9, 122.0, 123.4, 123.8, 127.1, 127.3, 128.3, 128.7, 128.86, 128.91, 129.1, 129.3, 131.4, 131.5, 131.8, 132.1 (2C), 136.1, 138.5, 144.5,



146.8, 192.1; IR (ATR): 3104, 3061, 2849, 2736, 2218, 1691, 1677, 1595, 1518, 1342, 1233, 1106  $\text{cm}^{-1}$ ; HRMS (ESI) Calcd for  $\text{C}_{25}\text{H}_{15}\text{NO}_3$   $[\text{M}+\text{Na}]^+$  400.0944, Found 400.0944.

**1-(2-Formyl)phenyl-2-(4-nitrophenyl)ethynynaphthalene (1j):**

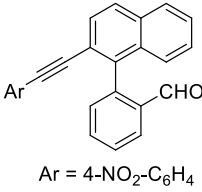  
Ar = 4- $\text{NO}_2$ - $\text{C}_6\text{H}_4$

$^1\text{H}$  NMR (600 MHz,  $\text{CDCl}_3$ )  $\delta$  7.21 (d,  $J$  = 9.0 Hz, 2H), 7.45-7.48 (m, 3H), 7.54-7.59 (m, 1H), 7.69 (ddd,  $J$  = 8.4, 8.4, 0.6 Hz, 1H), 7.70 (d,  $J$  = 8.4 Hz, 1H), 7.71 (ddd,  $J$  = 7.2, 7.2, 1.2 Hz, 1H), 7.94 (d,  $J$  = 7.8 Hz, 1H), 7.95 (d,  $J$  = 9.0 Hz, 1H), 8.10 (d,  $J$  = 9.0 Hz, 2H), 8.20 (dd,  $J$  = 7.8, 0.6 Hz, 1H), 9.66 (s, 1H);  $^{13}\text{C}$  NMR (150 MHz,  $\text{CDCl}_3$ )  $\delta$  92.6, 94.1, 120.4, 123.5, 126.4, 127.2, 127.4, 127.5, 127.6, 128.3, 128.69, 128.74, 129.6, 131.9, 132.0, 132.5, 133.3, 133.7, 135.1, 139.4, 142.3, 146.9, 191.4; IR (ATR): 3057, 2839, 2746, 2206, 1697, 1596, 1517, 1341, 1195, 1108, 854  $\text{cm}^{-1}$ ; HRMS (ESI) Calcd for  $\text{C}_{25}\text{H}_{15}\text{NO}_3$   $[\text{M}+\text{Na}]^+$  400.0944, Found 400.0944.

**2-(2-Formyl)phenyl-3-(4-nitrophenyl)ethynynaphthalene (1k):**

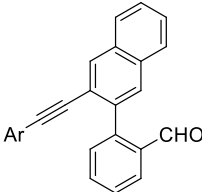  
Ar = 4- $\text{NO}_2$ - $\text{C}_6\text{H}_4$

$^1\text{H}$  NMR (600 MHz,  $\text{CDCl}_3$ )  $\delta$  7.29 (d,  $J$  = 8.4 Hz, 2H), 7.54 (d,  $J$  = 7.8 Hz, 1H), 7.59-7.64 (m, 3H), 7.73 (dd,  $J$  = 7.8, 7.8 Hz, 1H), 7.88-7.94 (m, 3H), 8.11-8.15 (m, 1H), 8.13 (d,  $J$  = 8.4 Hz, 2H), 8.23 (s, 1H), 9.96 (s, 1H);  $^{13}\text{C}$  NMR (150 MHz,  $\text{CDCl}_3$ )  $\delta$  91.8, 93.8, 120.2, 123.6, 127.0, 127.5, 127.8, 128.0, 128.1, 128.5, 129.6 (2C), 131.6, 131.9, 132.5, 132.7, 133.0, 133.6, 134.6, 137.0, 143.7, 147.0, 191.6; IR (ATR): 3057, 2923, 2851, 2752, 2213, 1693, 1595, 1516, 1340, 1236, 1091, 893  $\text{cm}^{-1}$ ; HRMS (ESI) Calcd for  $\text{C}_{25}\text{H}_{15}\text{NO}_3$   $[\text{M}+\text{Na}]^+$  400.0944, Found 400.0944.

**2-(2-Formyl)phenyl-1-(4-nitrophenyl)ethynynaphthalene (1l):**

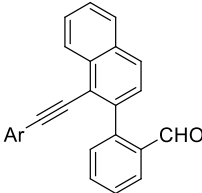  
Ar = 4- $\text{NO}_2$ - $\text{C}_6\text{H}_4$

$^1\text{H}$  NMR (600 MHz,  $\text{CDCl}_3$ )  $\delta$  7.39 (d,  $J$  = 9.0 Hz, 2H), 7.54 (d,  $J$  = 7.2 Hz, 1H), 7.58 (d,  $J$  = 8.4 Hz, 1H), 7.63 (dd,  $J$  = 7.8, 7.8 Hz, 1H), 7.65 (dd,  $J$  = 7.8, 7.8 Hz, 1H), 7.72 (dd,  $J$  = 7.2, 7.2 Hz, 1H), 7.74 (dd,  $J$  = 7.2, 7.2 Hz, 1H), 7.98 (d,  $J$  = 8.4 Hz, 1H), 8.02 (d,  $J$  = 8.4 Hz, 1H), 8.15 (d,  $J$  = 8.4 Hz, 1H), 8.16 (d,  $J$  = 9.0 Hz, 2H), 8.46 (d,  $J$  = 8.4 Hz, 1H), 9.95 (s, 1H);  $^{13}\text{C}$  NMR (150 MHz,  $\text{CDCl}_3$ )  $\delta$  91.6, 96.8, 119.9, 123.6, 126.3, 127.0, 127.3, 127.5, 128.1, 128.45, 128.51, 129.6, 129.7, 131.4, 131.9, 132.6, 132.8, 133.6, 134.4, 139.8, 144.4, 147.0, 191.6; IR (ATR): 3056, 2924, 2851, 2756, 2207, 1693, 1594, 1517, 1436, 1340, 1104  $\text{cm}^{-1}$ ; HRMS (ESI) Calcd for  $\text{C}_{25}\text{H}_{15}\text{NO}_3$   $[\text{M}+\text{Na}]^+$  400.0944, Found 400.0944.

**9-[Diethoxyphosphoryloxy(4-nitrophenyl)methyl]phenanthrene (3a):**

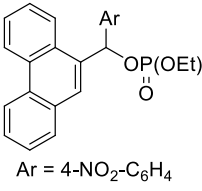  
Ar = 4- $\text{NO}_2$ - $\text{C}_6\text{H}_4$

$^1\text{H}$  NMR (600 MHz,  $\text{CDCl}_3$ )  $\delta$  1.05 (t,  $J$  = 7.2 Hz, 3H), 1.21 (t,  $J$  = 7.2 Hz, 3H), 3.86 (ddq,  $J$  = 10.2, 7.2, 7.2 Hz, 1H), 3.91 (ddq,  $J$  = 10.2, 7.2, 7.2 Hz, 1H), 3.99 (ddq,  $J$  = 10.2, 7.2, 7.2 Hz, 1H), 4.09 (ddq,  $J$  = 10.2, 7.2, 7.2 Hz, 1H), 7.11 (d,  $J$  = 8.4 Hz, 1H), 7.50 (dd,  $J$  = 7.8, 7.2 Hz, 1H), 7.65 (d,  $J$  = 8.4 Hz, 2H), 7.73 (dd,  $J$  = 7.8, 7.2 Hz, 1H), 7.62-7.68 (m, 2H), 7.91 (d,  $J$  = 7.8 Hz, 1H), 7.95 (d,  $J$  = 7.8 Hz, 1H), 8.00 (s, 1H), 8.18 (d,  $J$  = 8.4 Hz, 2H), 8.70 (d,  $J$  = 7.8 Hz, 1H), 8.74 (d,  $J$  = 8.4 Hz, 1H);  $^{31}\text{P}$  NMR (243 MHz,  $\text{CDCl}_3$ )  $\delta$  -0.77;  $^{13}\text{C}$  NMR (150 MHz,  $\text{CDCl}_3$ )  $\delta$  15.7 (d,  $J$  = 7.2 Hz), 15.9 (d,  $J$  = 7.2 Hz), 63.99 (d,  $J$  = 5.8 Hz), 64.04 (d,  $J$  = 7.1 Hz), 79.1, 122.5, 123.3, 123.7 (2C), 125.0, 126.7, 126.8, 127.1,

127.7, 127.8, 128.0, 128.5, 129.1, 130.7, 131.1, 132.1 (d,  $J = 2.9$  Hz), 146.9 (d,  $J = 5.7$  Hz), 147.5; IR (ATR): 3080, 3070, 2983, 2930, 2908, 2372, 2336, 1604, 1522, 1497, 1451, 1348, 1270, 1165, 1108, 1032, 998  $\text{cm}^{-1}$ ; HRMS (ESI) Calcd for  $\text{C}_{25}\text{H}_{24}\text{NO}_6\text{P}$   $[\text{M}+\text{Na}]^+$  488.1234, Found 488.1234.

**9-[Diethoxyphosphoryloxy(4-nitrophenyl)methyl]-3-fluorophenanthrene (3b)**

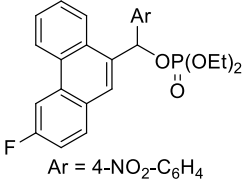  $^1\text{H}$  NMR (600 MHz,  $\text{CDCl}_3$ )  $\delta$  1.04 (t,  $J = 7.2$  Hz, 3H), 1.22 (t,  $J = 7.2$  Hz, 3H), 3.85 (ddq,  $J = 10.2, 7.2, 7.2$  Hz, 1H), 3.90 (ddq,  $J = 10.2, 7.2, 7.2$  Hz, 1H), 4.00 (ddq,  $J = 9.6, 7.2, 7.2$  Hz, 1H), 4.09 (ddq,  $J = 9.6, 7.2, 7.2$  Hz, 1H), 7.09 (d,  $J = 8.4$  Hz, 1H), 7.41 (ddd,  $J = 8.4, 8.4, 2.4$  Hz, 1H), 7.53 (d,  $J = 8.4$  Hz, 1H), 7.64 (d,  $J = 8.4$  Hz, 2H), 7.62-7.66 (m, 1H), 7.91-7.96 (m, 2H), 7.97 (s, 1H), 8.18 (d,  $J = 8.4$  Hz, 2H), 8.29 (dd,  $J = 10.8, 2.4$  Hz, 1H), 8.60 (d,  $J = 8.4$  Hz, 1H);  $^{31}\text{P}$  NMR (243 MHz,  $\text{CDCl}_3$ )  $\delta$  -0.77;  $^{13}\text{C}$  NMR (150 MHz,  $\text{CDCl}_3$ )  $\delta$  15.8 (d,  $J = 5.9$  Hz), 16.0 (d,  $J = 7.2$  Hz), 64.0 (d,  $J = 5.7$  Hz), 64.1 (d,  $J = 5.7$  Hz), 79.0, 107.9 (d,  $J = 21.6$  Hz), 116.2 (d,  $J = 24.5$  Hz), 123.6, 123.8, 125.1, 126.8, 127.4, 127.5, 127.8, 128.8, 130.5 (d,  $J = 4.4$  Hz), 131.2, 131.3, 131.5, 132.4 (d,  $J = 8.6$  Hz), 146.8 (d,  $J = 5.7$  Hz), 147.6, 162.2 (d,  $J = 245.6$  Hz); IR (ATR): 3082, 2985, 2909, 1630, 1605, 1523, 1504, 1452, 1348, 1271, 1178, 1032, 999, 899  $\text{cm}^{-1}$ ; HRMS (ESI) Calcd for  $\text{C}_{25}\text{H}_{23}\text{FNO}_6\text{P}$   $[\text{M}+\text{Na}]^+$  506.1139, Found 506.1139.

**9-[Diethoxyphosphoryloxy(4-nitrophenyl)methyl]-2-methoxyphenanthrene (3d):**

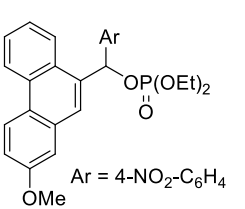  $^1\text{H}$  NMR (600 MHz,  $\text{CDCl}_3$ )  $\delta$  1.04 (t,  $J = 7.2$  Hz, 3H), 1.22 (t,  $J = 7.2$  Hz, 3H), 3.85 (ddq,  $J = 10.2, 7.2, 7.2$  Hz, 1H), 3.92 (ddq,  $J = 10.2, 7.2, 7.2$  Hz, 1H), 3.98 (s, 3H), 4.00 (ddq,  $J = 10.2, 7.2, 7.2$  Hz, 1H), 4.10 (ddq,  $J = 10.2, 7.2, 7.2$  Hz, 1H), 7.09 (d,  $J = 8.4$  Hz, 1H), 7.31 (d,  $J = 3.0$  Hz, 1H), 7.34 (dd,  $J = 9.0, 3.0$  Hz, 1H), 7.43 (dd,  $J = 7.8, 7.2$  Hz, 1H), 7.59 (dd,  $J = 7.8, 7.2$  Hz, 1H), 7.65 (d,  $J = 8.4$  Hz, 2H), 7.89 (d,  $J = 7.8$  Hz, 1H), 7.93 (s, 1H), 8.17 (d,  $J = 8.4$  Hz, 2H), 8.58 (d,  $J = 9.0$  Hz, 1H), 8.62 (d,  $J = 7.8$  Hz, 1H);  $^{31}\text{P}$  NMR (243 MHz,  $\text{CDCl}_3$ )  $\delta$  -0.79;  $^{13}\text{C}$  NMR (150 MHz,  $\text{CDCl}_3$ )  $\delta$  15.8 (d,  $J = 5.7$  Hz), 16.0 (d,  $J = 7.2$  Hz), 55.5, 64.0 (d,  $J = 5.9$  Hz), 64.1 (d,  $J = 5.7$  Hz), 79.0 (d,  $J = 3.0$  Hz), 109.0, 118.3, 122.9, 123.7, 124.2, 124.9, 125.0, 125.8, 126.8, 127.5, 127.6, 127.8, 131.3, 132.2, 132.8 (d,  $J = 2.9$  Hz), 147.0 (d,  $J = 5.7$  Hz), 147.6, 158.6; IR (ATR): 3080, 2983, 2937, 2909, 2840, 1605, 1522, 1347, 1269, 1231, 1033, 998  $\text{cm}^{-1}$ ; HRMS (ESI) Calcd for  $\text{C}_{26}\text{H}_{26}\text{NO}_7\text{P}$   $[\text{M}+\text{Na}]^+$  518.1339, Found 518.1339.

**1-Chloro-9-[diethoxyphosphoryloxy(4-nitrophenyl)methyl]phenanthrene (3e):**

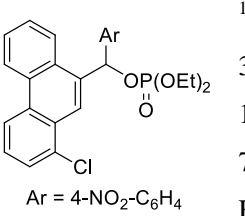  $^1\text{H}$  NMR (600 MHz,  $\text{CDCl}_3$ )  $\delta$  1.14 (t,  $J = 7.2$  Hz, 3H), 1.21 (t,  $J = 7.2$  Hz, 3H), 3.95-4.03 (m, 3H), 4.07 (ddq,  $J = 9.6, 7.2, 7.2$  Hz, 1H), 7.16 (d,  $J = 9.0$  Hz, 1H), 7.53 (dd,  $J = 7.8, 7.8$  Hz, 1H), 7.63 (dd,  $J = 7.8, 7.8$  Hz, 1H), 7.64-7.67 (m, 1H), 7.66 (d,  $J = 9.0$  Hz, 2H), 7.74 (d,  $J = 7.8$  Hz, 1H), 7.92 (d,  $J = 7.8$  Hz, 1H), 8.18 (d,  $J = 9.0$  Hz, 2H), 8.53 (s, 1H), 8.63 (d,  $J = 7.8$  Hz, 1H), 8.73 (d,  $J = 7.8$  Hz, 1H);  $^{31}\text{P}$  NMR (243 MHz,  $\text{CDCl}_3$ )  $\delta$  -0.91;  $^{13}\text{C}$  NMR (150 MHz,  $\text{CDCl}_3$ )  $\delta$  15.9 (d,  $J = 7.2$  Hz), 16.0 (d,  $J = 8.6$  Hz), 64.16 (d,  $J = 7.1$  Hz), 64.20 (d,  $J = 7.2$  Hz), 79.0, 121.6, 123.1, 123.7, 123.8, 125.1, 127.3, 127.5, 127.56, 127.60, 128.1, 128.2, 128.4, 130.8, 132.3, 133.2, 133.7 (d,  $J = 4.4$  Hz), 146.7 (d,  $J = 5.7$  Hz); IR (ATR): 3079, 2984, 2909, 1606, 1523, 1448, 1348, 1273, 1024, 999  $\text{cm}^{-1}$ ; HRMS (ESI) Calcd for  $\text{C}_{25}\text{H}_{23}\text{ClNO}_6\text{P}$   $[\text{M}+\text{Na}]^+$  522.0844, Found 522.0844.

### 3-Chloro-10-[diethoxyphosphoryloxy(4-nitrophenyl)methyl]phenanthrene (3f):

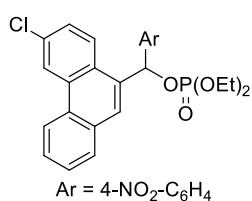

<sup>1</sup>H NMR (600 MHz, CDCl<sub>3</sub>) δ 1.05 (t, *J* = 7.2 Hz, 3H), 1.23 (t, *J* = 7.2 Hz, 3H), 3.86 (ddq, *J* = 9.6, 7.2, 7.2 Hz, 1H), 3.91 (ddq, *J* = 9.6, 7.2, 7.2 Hz, 1H), 4.01 (ddq, *J* = 10.2, 7.2, 7.2 Hz, 1H), 4.10 (ddq, *J* = 10.2, 7.2, 7.2 Hz, 1H), 7.05 (d, *J* = 9.0 Hz, 1H), 7.44 (dd, *J* = 9.0, 1.2 Hz, 1H), 7.62 (d, *J* = 9.0 Hz, 2H), 7.69 (dd, *J* = 7.8, 7.8 Hz, 1H), 7.74 (dd, *J* = 7.8, 7.8 Hz, 1H), 7.87 (d, *J* = 9.0 Hz, 1H), 7.95 (d, *J* = 7.8 Hz, 1H), 7.97 (s, 1H), 8.18 (d, *J* = 9.0 Hz, 2H), 8.61 (d, *J* = 9.0 Hz, 1H), 8.69 (d, *J* = 1.2 Hz, 1H); <sup>31</sup>P NMR (243 MHz, CDCl<sub>3</sub>) δ -0.73; <sup>13</sup>C NMR (150 MHz, CDCl<sub>3</sub>) δ 15.8 (d, *J* = 7.1 Hz), 16.0 (d, *J* = 7.2 Hz), 64.1 (d, *J* = 5.9 Hz), 64.2 (d, *J* = 5.7 Hz), 79.2, 122.7, 123.1, 123.8, 126.6, 126.9, 127.3, 127.7, 127.8, 128.1, 128.5, 129.2, 129.8, 131.1, 131.9 (d, *J* = 4.4 Hz), 132.5, 133.1, 146.7 (d, *J* = 5.9 Hz), 147.7; IR (ATR): 3071, 2984, 2928, 2909, 2866, 2854, 1599, 1522, 1496, 1348, 1269, 1032, 998 cm<sup>-1</sup>; HRMS (ESI) Calcd for C<sub>25</sub>H<sub>23</sub>ClNO<sub>6</sub>P [M+Na]<sup>+</sup> 522.0844, Found 522.0844; CCDC No. 1546787. A single crystal for single-crystal X-ray diffraction analysis was obtained by recrystallization from hexane/AcOEt.

### Figure S1. ORTEP diagram of 3f.

Hydrogens are omitted for clarity.

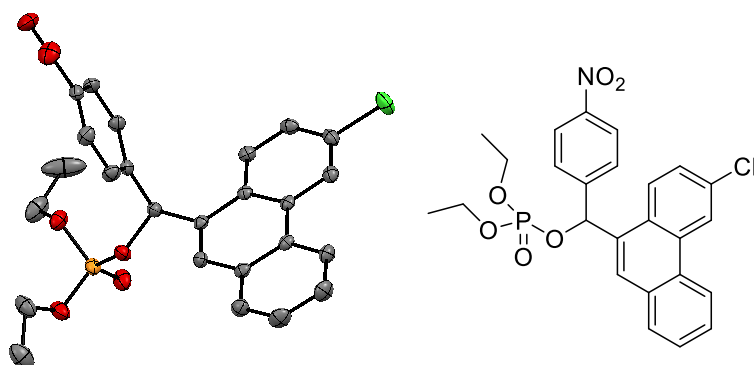

### 10-[Diethoxyphosphoryloxy(4-nitrophenyl)methyl]-3-trifluoromethylphenanthrene (3g):

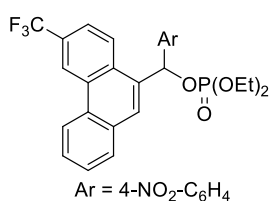

<sup>1</sup>H NMR (600 MHz, CDCl<sub>3</sub>) δ 1.05 (t, *J* = 7.2 Hz, 3H), 1.24 (t, *J* = 7.2 Hz, 3H), 3.86 (ddq, *J* = 9.6, 7.2, 7.2 Hz, 1H), 3.91 (ddq, *J* = 9.6, 7.2, 7.2 Hz, 1H), 4.02 (ddq, *J* = 9.6, 7.2, 7.2 Hz, 1H), 4.11 (ddq, *J* = 9.6, 7.2, 7.2 Hz, 1H), 7.11 (d, *J* = 8.4 Hz, 1H), 7.64 (d, *J* = 9.0 Hz, 2H), 7.69 (d, *J* = 8.4 Hz, 1H), 7.73 (dd, *J* = 7.8, 7.8 Hz, 1H), 7.80 (dd, *J* = 7.8, 7.8 Hz, 1H), 8.00 (d, *J* = 7.8 Hz, 1H), 8.05 (d, *J* = 8.4 Hz, 1H), 8.11 (s, 1H), 8.20 (d, *J* = 9.0 Hz, 2H), 8.72 (d, *J* = 7.8 Hz, 1H), 9.00 (s, 1H); <sup>31</sup>P NMR (243 MHz, CDCl<sub>3</sub>) δ -0.71; <sup>13</sup>C NMR (150 MHz, CDCl<sub>3</sub>) δ 15.8 (d, *J* = 7.2 Hz), 16.0 (d, *J* = 7.2 Hz), 64.1 (d, *J* = 5.7 Hz), 64.2 (d, *J* = 5.9 Hz), 79.0, 120.8 (q, *J* = 2.9 Hz), 122.6, 122.7 (q, *J* = 2.9 Hz), 123.8, 124.2 (q, *J* = 270.0 Hz), 126.0, 127.7, 128.0, 128.45, 128.47 (q, *J* = 33.0 Hz), 129.4, 130.4, 130.47, 130.54, 130.9, 131.0, 131.8 (d, *J* = 4.4 Hz), 146.5 (d, *J* = 7.2 Hz), 147.7; IR (ATR): 2984, 2908, 1734, 1605, 1524, 1349, 1321, 1277, 1124, 1034, 1000 cm<sup>-1</sup>; HRMS (ESI) Calcd for C<sub>26</sub>H<sub>23</sub>F<sub>3</sub>NO<sub>6</sub>P [M+Na]<sup>+</sup> 556.1107, Found 556.1107.

**10-[Diethoxyphosphoryloxy(4-nitrophenyl)methyl]-2,3-dioxymethylenephenanthrene (3h):**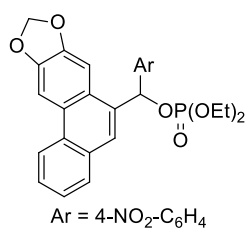

$^1\text{H}$  NMR (600 MHz,  $\text{CDCl}_3$ )  $\delta$  1.05 (t,  $J = 7.2$  Hz, 3H), 1.23 (t,  $J = 7.2$  Hz, 3H), 3.86 (ddq,  $J = 9.6, 7.2, 7.2$  Hz, 1H), 3.91 (ddq,  $J = 9.6, 7.2, 7.2$  Hz, 1H), 4.01 (ddq,  $J = 9.6, 7.2, 7.2$  Hz, 1H), 4.11 (ddq,  $J = 9.6, 7.2, 7.2$  Hz, 1H), 6.05 (s, 1H), 6.06 (s, 1H), 6.97 (d,  $J = 8.4$  Hz, 1H), 7.25 (s, 1H), 7.59 (dd,  $J = 7.8, 7.8$  Hz, 1H), 7.61 (d,  $J = 9.0$  Hz, 2H), 7.66 (dd,  $J = 7.8, 7.8$  Hz, 1H), 7.91 (s, 1H), 7.92 (d,  $J = 7.8$  Hz, 1H), 8.05 (s, 1H), 8.17 (d,  $J = 9.0$  Hz, 2H), 8.46 (d,  $J = 7.8$  Hz, 1H);  $^{31}\text{P}$  NMR (243 MHz,  $\text{CDCl}_3$ )  $\delta$  -0.74;  $^{13}\text{C}$  NMR (150 MHz,  $\text{CDCl}_3$ )  $\delta$  15.8 (d,  $J = 7.2$  Hz), 16.0 (d,  $J = 5.9$  Hz), 64.0 (d,  $J = 5.7$  Hz), 64.1 (d,  $J = 4.4$  Hz), 79.8, 101.4, 101.6, 103.0, 122.3, 123.8, 124.9, 126.3, 126.8, 127.4, 127.7, 127.8, 129.1, 130.2, 130.6, 131.6 (d,  $J = 3.0$  Hz), 146.9 (d,  $J = 5.7$  Hz), 147.6, 147.7, 148.0; IR (ATR): 2985, 2907, 1605, 1523, 1503, 1474, 1348, 1266, 1244, 1217, 1033, 999  $\text{cm}^{-1}$ ; HRMS (ESI) Calcd for  $\text{C}_{25}\text{H}_{24}\text{NO}_8\text{P}$   $[\text{M}+\text{Na}]^+$  532.1131, Found 532.1131.

**5-[Diethoxyphosphoryloxy(4-nitrophenyl)methyl]benzo[c]phenanthrene (3i):**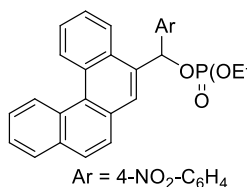

$^1\text{H}$  NMR (600 MHz,  $\text{CDCl}_3$ )  $\delta$  1.04 (t,  $J = 7.2$  Hz, 3H), 1.21 (t,  $J = 7.2$  Hz, 3H), 3.86 (ddq,  $J = 10.2, 7.2, 7.2$  Hz, 1H), 3.91 (ddq,  $J = 10.2, 7.2, 7.2$  Hz, 1H), 4.00 (ddq,  $J = 9.6, 7.2, 7.2$  Hz, 1H), 4.10 (ddq,  $J = 9.6, 7.2, 7.2$  Hz, 1H), 7.21 (d,  $J = 8.4$  Hz, 1H), 7.54 (dd,  $J = 7.8, 7.2$  Hz, 1H), 7.64-7.72 (m, 3H), 7.67 (d,  $J = 8.4$  Hz, 2H), 7.87 (d,  $J = 8.4$  Hz, 1H), 7.96 (d,  $J = 8.4$  Hz, 1H), 8.05 (d,  $J = 7.8$  Hz, 1H), 8.06 (d,  $J = 7.8$  Hz, 1H), 8.07 (s, 1H), 8.19 (d,  $J = 8.4$  Hz, 2H), 9.05 (d,  $J = 8.4$  Hz, 1H), 9.13 (d,  $J = 8.4$  Hz, 1H);  $^{31}\text{P}$  NMR (243 MHz,  $\text{CDCl}_3$ )  $\delta$  -0.73;  $^{13}\text{C}$  NMR (150 MHz,  $\text{CDCl}_3$ )  $\delta$  15.8 (d,  $J = 5.7$  Hz), 16.0 (d,  $J = 7.2$  Hz), 64.06 (d,  $J = 5.9$  Hz), 64.11 (d,  $J = 7.2$  Hz), 78.7 (d,  $J = 3.0$  Hz), 123.8, 124.5, 126.1, 126.2, 126.4, 126.5, 126.7, 127.7 (2C), 128.0, 128.1 (2C), 128.3, 128.6, 128.8, 129.7, 129.8, 131.1, 132.5 (d,  $J = 2.9$  Hz), 133.9, 147.0 (d,  $J = 4.4$  Hz), 147.6; IR (ATR): 2976, 2911, 1526, 1347, 1236, 1090, 1034, 932, 887  $\text{cm}^{-1}$ ; HRMS (ESI) Calcd for  $\text{C}_{29}\text{H}_{26}\text{NO}_6\text{P}$   $[\text{M}+\text{Na}]^+$  538.1390, Found 538.1390.

**6-[Diethoxyphosphoryloxy(4-nitrophenyl)methyl]benzo[c]phenanthrene (3j):**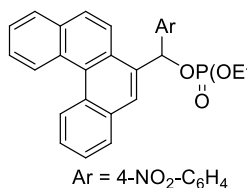

$^1\text{H}$  NMR (600 MHz,  $\text{CDCl}_3$ )  $\delta$  1.00 (t,  $J = 7.2$  Hz, 3H), 1.21 (t,  $J = 7.2$  Hz, 3H), 3.83 (ddq,  $J = 9.6, 7.2, 7.2$  Hz, 1H), 3.88 (ddq,  $J = 9.6, 7.2, 7.2$  Hz, 1H), 3.99 (ddq,  $J = 9.6, 7.2, 7.2$  Hz, 1H), 4.10 (ddq,  $J = 9.6, 7.2, 7.2$  Hz, 1H), 7.18 (d,  $J = 8.4$  Hz, 1H), 7.61-7.65 (m, 1H), 7.64 (d,  $J = 9.0$  Hz, 2H), 7.66-7.70 (m, 2H), 7.73 (dd,  $J = 7.8, 7.8$  Hz, 1H), 7.79 (d,  $J = 9.0$  Hz, 1H), 7.88 (d,  $J = 9.0$  Hz, 1H), 7.96 (d,  $J = 7.8$  Hz, 1H), 8.07 (d,  $J = 7.8$  Hz, 1H), 8.12 (s, 1H), 8.17 (d,  $J = 9.0$  Hz, 1H), 9.06 (d,  $J = 8.4$  Hz, 1H), 9.07 (d,  $J = 7.8$  Hz, 1H);  $^{31}\text{P}$  NMR (243 MHz,  $\text{CDCl}_3$ )  $\delta$  -0.73;  $^{13}\text{C}$  NMR (150 MHz,  $\text{CDCl}_3$ )  $\delta$  15.8 (d,  $J = 7.2$  Hz), 16.0 (d,  $J = 7.2$  Hz), 64.06 (d,  $J = 5.7$  Hz), 64.13 (d,  $J = 5.9$  Hz), 79.3, 122.2, 123.8, 126.3, 126.5, 126.6, 127.0, 127.6 (2C), 127.9, 128.2, 128.27, 128.31, 128.4, 128.8, 129.0, 130.2, 130.5, 132.0 (d,  $J = 4.4$  Hz), 132.2, 132.9, 147.2 (d,  $J = 5.7$  Hz), 147.6; IR (ATR): 3054, 2985, 2907, 1601, 1522, 1490, 1347, 1270, 1093, 1029, 1004  $\text{cm}^{-1}$ ; HRMS (ESI) Calcd for  $\text{C}_{29}\text{H}_{26}\text{NO}_6\text{P}$   $[\text{M}+\text{Na}]^+$  538.1390, Found 538.1390.

**6-[Diethoxyphosphoryloxy(4-nitrophenyl)methyl]benzo[a]anthracene (3k):**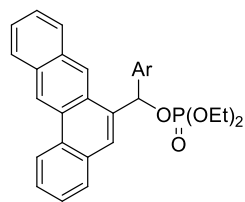Ar = 4-NO<sub>2</sub>-C<sub>6</sub>H<sub>4</sub>

<sup>1</sup>H NMR (600 MHz, CDCl<sub>3</sub>) δ 1.05 (t, *J* = 7.2 Hz, 3H), 1.22 (t, *J* = 7.2 Hz, 3H), 3.90 (ddq, *J* = 10.2, 7.2, 7.2 Hz, 1H), 3.95 (ddq, *J* = 10.2, 7.2, 7.2 Hz, 1H), 4.01 (ddq, *J* = 10.2, 7.2, 7.2 Hz, 1H), 4.10 (ddq, *J* = 10.2, 7.2, 7.2 Hz, 1H), 7.20 (d, *J* = 8.4 Hz, 1H), 7.52 (ddd, *J* = 8.4, 8.4, 1.2 Hz, 1H), 7.56 (ddd, *J* = 8.4, 8.4, 1.2 Hz, 1H), 7.67 (dd, *J* = 8.4, 8.4 Hz, 1H), 7.72-7.78 (m, 1H), 7.75 (d, *J* = 9.0 Hz, 2H), 7.89 (s, 1H), 7.90 (d, *J* = 8.4 Hz, 1H), 7.91 (d, *J* = 3.6 Hz, 1H), 8.09 (d, *J* = 8.4 Hz, 1H), 8.19 (d, *J* = 9.0 Hz, 2H), 8.41 (s, 1H), 8.84 (d, *J* = 8.4 Hz, 1H), 9.22 (s, 1H); <sup>31</sup>P NMR (243 MHz, CDCl<sub>3</sub>) δ -0.61; <sup>13</sup>C NMR (150 MHz, CDCl<sub>3</sub>) δ 15.8 (d, *J* = 5.7 Hz), 16.0 (d, *J* = 7.2 Hz), 64.05 (d, *J* = 5.7 Hz), 64.09 (d, *J* = 4.4 Hz), 79.0, 122.3, 122.8, 123.7, 124.0, 126.2, 126.3, 126.9, 127.4, 127.9, 127.98, 128.02, 128.1, 128.3, 129.2, 129.3, 130.5, 131.0, 131.47, 131.52, 132.3 (d, *J* = 4.4 Hz), 146.9 (d, *J* = 5.9 Hz), 147.6; IR (ATR): 3057, 2984, 2932, 2908, 2867, 1606, 1522, 1347, 1269, 1031, 1000, 970 cm<sup>-1</sup>; HRMS (ESI) Calcd for C<sub>29</sub>H<sub>26</sub>NO<sub>6</sub>P [M+Na]<sup>+</sup> 538.1390, Found 538.1390.

**5-[Diethoxyphosphoryloxy(4-nitrophenyl)methyl]chrysene (3l):**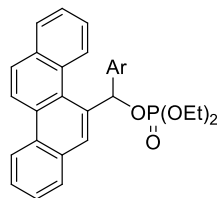Ar = 4-NO<sub>2</sub>-C<sub>6</sub>H<sub>4</sub>

<sup>1</sup>H NMR (600 MHz, CDCl<sub>3</sub>) δ 0.81 (t, *J* = 7.2 Hz, 3H), 1.04 (t, *J* = 6.6 Hz, 3H), 3.62-3.77 (m, 3H), 3.89-3.97 (m, 1H), 7.44 (dd, *J* = 7.2, 7.2 Hz, 1H), 7.58 (dd, *J* = 7.2, 7.2 Hz, 1H), 7.70-7.73 (m, 1H), 7.77 (dd, *J* = 7.8, 7.8 Hz, 1H), 7.79-7.83 (m, 2H), 7.99 (d, *J* = 7.8 Hz, 1H), 8.01 (d, *J* = 9.0 Hz, 2H), 8.10-8.23 (m, 1H), 8.22 (d, *J* = 9.0 Hz, 2H), 8.31 (s, 1H), 8.75 (d, *J* = 9.0 Hz, 1H), 8.78 (d, *J* = 8.4 Hz, 1H); <sup>31</sup>P NMR (243 MHz, CDCl<sub>3</sub>) δ -1.1; <sup>13</sup>C NMR (150 MHz, CDCl<sub>3</sub>) δ 15.6 (d, *J* = 7.2 Hz), 15.8 (d, *J* = 7.2 Hz), 63.9 (d, *J* = 5.7 Hz), 63.9 (d, *J* = 7.2 Hz), 78.7, 121.4, 123.2, 123.8, 126.0, 126.4, 127.0, 127.4, 127.5, 127.7, 128.1, 128.7, 129.2, 129.3 (2C), 129.8, 130.3 (2C), 131.2, 133.2, 133.7, 147.5 (d, *J* = 7.2 Hz), 147.8; IR (ATR): 3593, 3056, 2983, 2907, 1604, 1522, 1347, 1270, 1166, 1106, 1032, 1004, 982 cm<sup>-1</sup>; HRMS (ESI) Calcd for C<sub>29</sub>H<sub>26</sub>NO<sub>6</sub>P [M+Na]<sup>+</sup> 538.1390, Found 538.1390.

**9-[Dimethoxyphosphoryloxy(4-nitrophenyl)methyl]phenanthrene (3m):**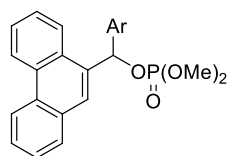Ar = 4-NO<sub>2</sub>-C<sub>6</sub>H<sub>4</sub>

<sup>1</sup>H NMR (600 MHz, CDCl<sub>3</sub>) δ 3.52 (d, *J* = 10.8 Hz, 3H), 3.70 (d, *J* = 11.4 Hz, 3H), 7.12 (d, *J* = 9.0 Hz, 1H), 7.50 (ddd, *J* = 8.4, 7.2, 1.2 Hz, 1H), 7.62-7.68 (m, 4H), 7.73 (ddd, *J* = 7.8, 7.2, 1.2 Hz, 1H), 7.90 (d, *J* = 7.8 Hz, 1H), 7.96 (dd, *J* = 7.8, 1.2 Hz, 1H), 8.01 (s, 1H), 8.18 (d, *J* = 9.0 Hz, 2H), 8.69 (d, *J* = 7.8 Hz, 1H), 8.74 (d, *J* = 8.4 Hz, 1H); <sup>31</sup>P NMR (243 MHz, CDCl<sub>3</sub>) δ 1.65; <sup>13</sup>C NMR (150 MHz, CDCl<sub>3</sub>) δ 54.39 (d, *J* = 5.7 Hz), 54.44 (d, *J* = 5.7 Hz), 79.4, 122.6, 123.4, 123.8, 124.9, 126.86, 126.90, 127.2, 127.8, 127.9, 128.0, 128.5, 129.2, 130.7, 130.8, 131.2, 132.0 (d, *J* = 3.0 Hz), 146.8 (d, *J* = 5.7 Hz), 147.7; IR (ATR): 2956, 2918, 2853, 1606, 1523, 1451, 1348, 1272, 1187, 1042, 1000, 854 cm<sup>-1</sup>; HRMS (ESI) Calcd for C<sub>23</sub>H<sub>20</sub>NO<sub>6</sub>P [M+Na]<sup>+</sup> 460.0920, Found 460.0920.

**9-[Diisopropoxyphosphoryloxy(4-nitrophenyl)methyl]phenanthrene (3n):**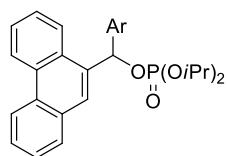Ar = 4-NO<sub>2</sub>-C<sub>6</sub>H<sub>4</sub>

δ 1.00 (d, *J* = 6.0 Hz, 3H), 1.139 (d, *J* = 6.0 Hz, 3H), 1.143 (d, *J* = 6.0 Hz, 3H), 1.29 (d, *J* = 6.0 Hz, 3H), 4.47 (dsep, *J* = 7.2, 6.0 Hz, 1H), 4.61 (dsep, *J* = 7.2, 6.0 Hz, 1H), 7.10 (d, *J* = 8.4 Hz, 1H), 7.49 (ddd, *J* = 8.4, 7.2, 1.2 Hz, 1H), 7.62 (ddd, *J* = 8.4, 7.2, 1.2 Hz, 1H), 7.65 (ddd, *J* = 8.4, 7.2, 1.2 Hz, 1H), 7.66 (d, *J* = 9.0 Hz, 2H), 7.71 (ddd, *J* = 8.4, 7.2, 1.2 Hz, 1H), 7.93 (dd,

$J = 8.4, 1.2$  Hz, 1H), 7.95 (dd,  $J = 8.4, 1.2$  Hz, 1H), 8.01 (s, 1H), 8.16 (d,  $J = 9.0$  Hz, 2H), 8.69 (d,  $J = 8.4$  Hz, 1H), 8.73 (d,  $J = 8.4$  Hz, 1H);  $^{31}\text{P}$  NMR (243 MHz,  $\text{CDCl}_3$ )  $\delta$  -2.42;  $^{13}\text{C}$  NMR (150 MHz,  $\text{CDCl}_3$ )  $\delta$  23.2 (d,  $J = 5.9$  Hz), 23.4 (d,  $J = 5.9$  Hz), 23.4 (d,  $J = 5.9$  Hz), 23.5 (d,  $J = 4.4$  Hz), 72.8 (d,  $J = 5.7$  Hz), 72.9 (d,  $J = 5.7$  Hz), 78.9, 122.5, 123.3, 123.6, 125.0, 126.6, 126.7, 127.0, 127.6, 127.85, 127.90, 128.6, 129.0, 130.66, 130.72, 131.1, 132.4 (d,  $J = 4.4$  Hz), 147.2 (d,  $J = 5.7$  Hz), 147.5; IR (ATR): 3064, 2980, 2936, 2871, 1604, 1522, 1452, 1347, 1258, 1107, 989  $\text{cm}^{-1}$ ; HRMS (ESI) Calcd for  $\text{C}_{27}\text{H}_{28}\text{NO}_6\text{P}$   $[\text{M}+\text{Na}]^+$  516.1546, Found 516.1546.

### 2-Diethoxyphosphoryl(hydroxy)methyl-2'-(4-nitrophenyl)ethynyl-1,1'-biphenyl (4a):

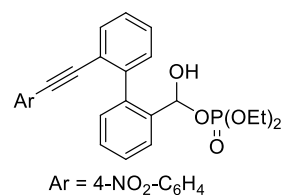

Mixture of diastereomers. The ratio is 74:26.

$^1\text{H}$  NMR (600 MHz,  $\text{CDCl}_3$ )  $\delta$  0.98 (t,  $J = 7.2$  Hz, 0.78H), 1.14 (t,  $J = 7.2$  Hz, 0.78H), 1.18 (t,  $J = 7.2$  Hz, 2.22H), 1.21 (t,  $J = 7.2$  Hz, 2.22H), 3.00 (dd,  $J = 12.6, 5.4$  Hz, 0.74H), 3.20 (dd,  $J = 6.0, 6.0$  Hz, 0.26H), 3.78 (ddq,  $J = 9.6, 7.2, 7.2$  Hz, 0.26H), 3.86 (ddq,  $J = 9.6, 7.2, 7.2$  Hz, 0.26H), 3.88-4.03 (m, 3.48H), 4.97 (dd,  $J = 11.4, 6.0$  Hz, 0.26H), 5.03 (dd,  $J = 10.8, 5.4$  Hz, 0.74H), 7.23 (d,  $J = 8.4$  Hz, 0.52H), 7.24 (d,  $J = 6.6$  Hz, 0.74 H), 7.31 (d,  $J = 8.4$  Hz, 1.48H), 7.39-7.53 (m, 5.26H), 7.63 (d,  $J = 6.6$  Hz, 0.74H), 7.68 (d,  $J = 7.2$  Hz, 0.26H), 7.89 (d,  $J = 7.8$  Hz, 0.74H), 8.02 (d,  $J = 7.8$  Hz, 0.26H), 8.08 (d,  $J = 8.4$  Hz, 1.48H), 8.10 (d,  $J = 8.4$  Hz, 0.52H);  $^{31}\text{P}$  NMR (243 MHz,  $\text{CDCl}_3$ )  $\delta$  22.9, 22.6;  $^{13}\text{C}$  NMR (150 MHz,  $\text{CDCl}_3$ )  $\delta$  16.2 (d,  $J = 4.2$  Hz), 16.27 (d,  $J = 7.2$  Hz), 16.32 (d,  $J = 5.7$  Hz), 62.66 (d,  $J = 7.2$  Hz), 62.70 (d,  $J = 4.2$  Hz), 63.0 (d,  $J = 7.2$  Hz), 63.1 (d,  $J = 7.1$  Hz), 67.0 (d,  $J = 159.5$  Hz), 67.7 (d,  $J = 158.0$  Hz), 91.0, 91.4, 93.5, 94.6, 121.3, 122.1, 123.3, 123.5, 127.5, 127.56, 127.59, 127.8 (d,  $J = 2.9$  Hz), 128.0, 128.1, 128.2, 128.7 (d,  $J = 2.9$  Hz), 129.1, 129.2, 129.8, 129.9, 130.0, 130.1, 130.9, 131.0, 131.7, 131.8, 132.2, 132.6, 134.7, 135.2, 139.7 (d,  $J = 8.6$  Hz), 140.1 (d,  $J = 10.1$  Hz), 143.1, 143.6, 146.8 (2C); IR (ATR): 3283, 3061, 2982, 2218, 1594, 1518, 1342, 1228, 1106, 1041, 1023, 971  $\text{cm}^{-1}$ ; HRMS (ESI) Calcd for  $\text{C}_{25}\text{H}_{24}\text{NO}_6\text{P}$   $[\text{M}+\text{Na}]^+$  488.1234, Found 488.1234.

### 2-Diethoxyphosphoryloxymethyl-2'-(4-nitrophenyl)ethynyl-1,1'-biphenyl (5a):

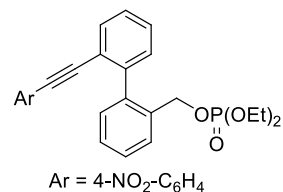

$^1\text{H}$  NMR (600 MHz,  $\text{CDCl}_3$ )  $\delta$  1.20 (t,  $J = 7.2$  Hz, 3H), 1.22 (t,  $J = 7.2$  Hz, 3H), 3.91-4.03 (m, 4H), 4.90 (dd,  $J = 12.0, 6.6$  Hz, 1H), 5.00 (dd,  $J = 12.0, 6.6$  Hz, 1H), 7.21 (d,  $J = 9.0$  Hz, 2H), 7.32 (dd,  $J = 7.8, 1.2$  Hz, 1H), 7.36 (dd,  $J = 7.8, 1.2$  Hz, 1H), 7.42 (ddd,  $J = 7.8, 7.8, 1.2$  Hz, 1H), 7.43 (ddd,  $J = 7.8, 7.8, 1.2$  Hz, 1H), 7.46 (ddd,  $J = 7.8, 7.8, 1.8$  Hz, 1H), 7.48 (ddd,  $J = 7.8, 7.8, 1.8$  Hz, 1H), 7.64 (dd,  $J = 7.8, 1.8$  Hz, 1H), 7.65 (dd,  $J = 7.8, 1.8$  Hz, 1H), 8.10 (d,  $J = 9.0$  Hz, 2H);  $^{13}\text{C}$  NMR (150 MHz,  $\text{CDCl}_3$ )  $\delta$  16.0 (d,  $J = 7.2$  Hz), 63.7 (d,  $J = 5.9$  Hz), 66.6 (d,  $J = 5.7$  Hz), 91.0, 93.7, 121.8, 123.5, 127.8, 128.0, 128.18, 128.23, 129.3, 129.8, 129.9, 130.2, 131.9, 132.0, 134.3 (d,  $J = 7.2$  Hz), 139.7, 143.1, 146.8; IR (ATR): 2983, 2908, 2217, 1594, 1519, 1441, 1343, 1273, 1096, 1029, 981  $\text{cm}^{-1}$ ; HRMS (ESI) Calcd for  $\text{C}_{25}\text{H}_{24}\text{NO}_6\text{P}$   $[\text{M}+\text{Na}]^+$  488.1234, Found 488.1234.

### 9-[(4-Methoxyphenyl)(4-nitrophenyl)methyl]phenanthrene (6a):

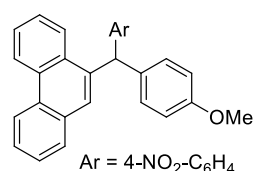

$^1\text{H}$  NMR (600 MHz,  $\text{CDCl}_3$ )  $\delta$  3.81 (s, 3H), 6.29 (s, 1H), 6.87 (d,  $J = 8.4$  Hz, 2H), 7.06 (d,  $J = 8.4$  Hz, 2H), 7.10 (s, 1H), 7.33 (d,  $J = 9.0$  Hz, 2H), 7.51 (dd,  $J = 8.4, 7.8$  Hz, 1H), 7.55 (dd,  $J = 7.8, 7.2$  Hz, 1H), 7.64 (dd,  $J = 8.4, 8.4$  Hz, 1H), 7.65 (dd,  $J = 7.8, 7.2$  Hz, 1H), 7.68

(d,  $J = 7.8$  Hz, 1H), 7.93 (d,  $J = 8.4$  Hz, 1H), 8.16 (d,  $J = 9.0$  Hz, 2H), 8.68 (d,  $J = 7.8$  Hz, 1H), 8.75 (d,  $J = 7.8$  Hz, 1H);  $^{13}\text{C}$  NMR (150 MHz,  $\text{CDCl}_3$ )  $\delta$  52.5, 55.2, 114.2, 122.4, 123.3, 123.7, 124.8, 126.5, 126.81, 126.84, 126.9, 128.68, 128.74, 129.9, 130.4, 130.6, 130.7, 130.9, 131.1, 133.8, 137.0, 146.6, 151.7, 158.5; IR (ATR): 3076, 2933, 2836, 1606, 1510, 1346, 1249, 1179, 1111, 1036  $\text{cm}^{-1}$ ; HRMS (ESI) Calcd for  $\text{C}_{28}\text{H}_{21}\text{NO}_3$   $[\text{M}+\text{Na}]^+$  442.1414, Found 442.1413.

**9-[(4-Nitrophenyl)(phenyl)methyl]phenanthrene (6b):**

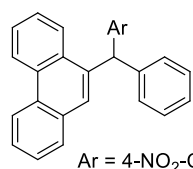

$^1\text{H}$  NMR (600 MHz,  $\text{CDCl}_3$ )  $\delta$  6.34 (s, 1H), 7.10 (s, 1H), 7.15 (d,  $J = 8.4$  Hz, 2H), 7.30 (dd,  $J = 7.8, 7.8$  Hz, 1H), 7.32-7.36 (m, 5H), 7.51 (dd,  $J = 7.8, 7.2$  Hz, 1H), 7.55 (dd,  $J = 7.8, 7.2$  Hz, 1H), 7.63 (dd,  $J = 7.8, 7.2$  Hz, 1H), 7.65 (dd,  $J = 7.8, 7.2$  Hz, 1H), 7.67 (d,  $J = 7.8$  Hz, 1H), 7.93 (d,  $J = 7.8$  Hz, 1H), 8.16 (d,  $J = 8.4$  Hz, 2H), 8.67 (d,  $J = 7.8$  Hz, 1H), 8.75 (d,  $J = 7.8$  Hz, 1H);  $^{13}\text{C}$  NMR (150 MHz,  $\text{CDCl}_3$ )  $\delta$  53.3, 122.4, 123.3, 123.7, 124.8, 126.5, 126.8, 126.89, 126.94, 127.2, 128.78, 128.85 (2c), 129.7, 130.0, 130.5, 130.7, 131.0, 131.1, 136.7, 141.8, 146.7, 151.3; IR (ATR): 3077, 3061, 3028, 2927, 2853, 1600, 1518, 1494, 1345, 1110  $\text{cm}^{-1}$ ; HRMS (ESI) Calcd for  $\text{C}_{27}\text{H}_{19}\text{NO}_2$   $[\text{M}+\text{Na}]^+$  412.1308, Found 412.1308.

**9-[(4-Nitrophenyl)(4-trifluoromethylphenyl)methyl]phenanthrene (6c):**

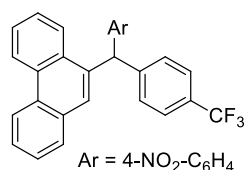

$^1\text{H}$  NMR (600 MHz,  $\text{CDCl}_3$ )  $\delta$  6.40 (s, 1H), 7.07 (s, 1H), 7.28 (d,  $J = 8.4$  Hz, 2H), 7.34 (d,  $J = 9.0$  Hz, 2H), 7.52 (dd,  $J = 8.4, 7.2$  Hz, 1H), 7.57 (dd,  $J = 7.8, 7.2$  Hz, 1H), 7.60 (d,  $J = 8.4$  Hz, 2H), 7.66 (dd,  $J = 8.4, 7.8$  Hz, 1H), 7.67 (dd,  $J = 8.4, 7.2$  Hz, 1H), 7.69 (d,  $J = 7.2$  Hz, 1H), 7.87 (d,  $J = 8.4$  Hz, 1H), 8.19 (d,  $J = 9.0$  Hz, 2H), 8.69 (d,  $J = 8.4$  Hz, 1H), 8.77 (d,  $J = 8.4$  Hz, 1H);  $^{13}\text{C}$  NMR (150 MHz,  $\text{CDCl}_3$ )  $\delta$  53.0, 122.5, 123.4, 123.9, 124.0 (q,  $J = 270$  Hz), 124.5, 125.8 (q,  $J = 2.9$  Hz), 126.7, 126.99, 127.03, 127.2, 128.8, 129.0, 129.5 (q,  $J = 31.7$  Hz), 129.99, 130.02, 130.4, 130.5, 130.96, 131.04, 135.8, 145.9, 146.9, 150.1; IR (ATR): 3077, 2921, 1597, 1519, 1346, 1324, 1165, 1124, 1112, 1068, 1018  $\text{cm}^{-1}$ ; HRMS (ESI) Calcd for  $\text{C}_{28}\text{H}_{18}\text{F}_3\text{NO}_2$   $[\text{M}+\text{Na}]^+$  480.1182, Found 480.1182.

**9-[(4-Nitrophenyl)(tosylamido)methyl]phenanthrene (7):**

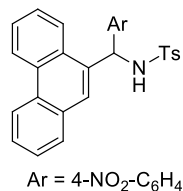

$^1\text{H}$  NMR (600 MHz,  $\text{CDCl}_3$ )  $\delta$  2.24 (s, 3H), 5.46 (d,  $J = 7.2$  Hz, 1H), 6.30 (d,  $J = 7.2$  Hz, 1H), 6.96 (d,  $J = 7.8$  Hz, 2H), 7.24 (s, 1H), 7.48 (d,  $J = 9.0$  Hz, 2H), 7.45-7.51 (m, 3H), 7.57 (ddd,  $J = 7.8, 7.2, 1.2$  Hz, 1H), 7.60-7.69 (m, 4H), 8.08 (d,  $J = 9.0$  Hz, 2H), 8.62 (d,  $J = 8.4$  Hz, 1H), 8.70 (d,  $J = 8.4$  Hz, 1H);  $^{13}\text{C}$  NMR (150 MHz,  $\text{CDCl}_3$ )  $\delta$  21.3, 59.0, 122.4, 123.6, 123.8, 123.9, 126.9, 127.0, 127.1, 127.2, 127.6, 128.36, 128.44, 128.5, 128.8, 129.4, 130.3, 130.6, 131.2, 131.9, 136.7, 143.8, 147.36, 147.38; IR (ATR): 3269, 2959, 2925, 2853, 1599, 1520, 1450, 1346, 1158, 1090  $\text{cm}^{-1}$ ; HRMS (ESI) Calcd for  $\text{C}_{28}\text{H}_{22}\text{N}_2\text{O}_4\text{S}$   $[\text{M}+\text{Na}]^+$  505.1193, Found 505.1193.

**9-[(4-Methoxyphenylsulfanyl)(4-nitrophenyl)methyl]phenanthrene (8):**

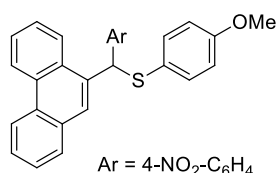

<sup>1</sup>H NMR (600 MHz, CDCl<sub>3</sub>)  $\delta$  3.75 (s, 3H), 6.10 (s, 1H), 6.76 (d,  $J$  = 9.0 Hz, 2H), 7.29 (d,  $J$  = 9.0 Hz, 2H), 7.54 (d,  $J$  = 9.0 Hz, 2H), 7.55 (dd,  $J$  = 7.8, 7.8 Hz, 1H), 7.63 (dd,  $J$  = 7.8, 7.2 Hz, 1H), 7.64 (dd,  $J$  = 7.8, 7.2 Hz, 1H), 7.68 (dd,  $J$  = 7.8, 7.2 Hz, 1H), 7.92 (d,  $J$  = 7.2 Hz, 1H), 7.98 (d,  $J$  = 7.8 Hz, 1H), 8.06 (s, 1H), 8.09 (d,  $J$  = 9.0 Hz, 2H), 8.67 (d,  $J$  = 7.8 Hz, 1H), 8.74 (d,  $J$  = 7.8 Hz, 1H); <sup>13</sup>C NMR (150 MHz, CDCl<sub>3</sub>)  $\delta$  55.3, 55.9, 114.7, 122.5, 123.5, 123.7, 124.1, 125.1, 126.6, 126.8, 127.0, 127.3, 128.0, 128.9, 129.4, 129.8, 130.2, 131.1 (2C), 133.0, 134.8, 146.9, 148.7, 159.8; IR (ATR): 3075, 2938, 2836, 1592, 1519, 1493, 1345, 1287, 1248, 1173, 1105, 1031 cm<sup>-1</sup>; HRMS (ESI) Calcd for C<sub>28</sub>H<sub>21</sub>NO<sub>3</sub>S [M+Na]<sup>+</sup> 474.1134, Found 474.1134.



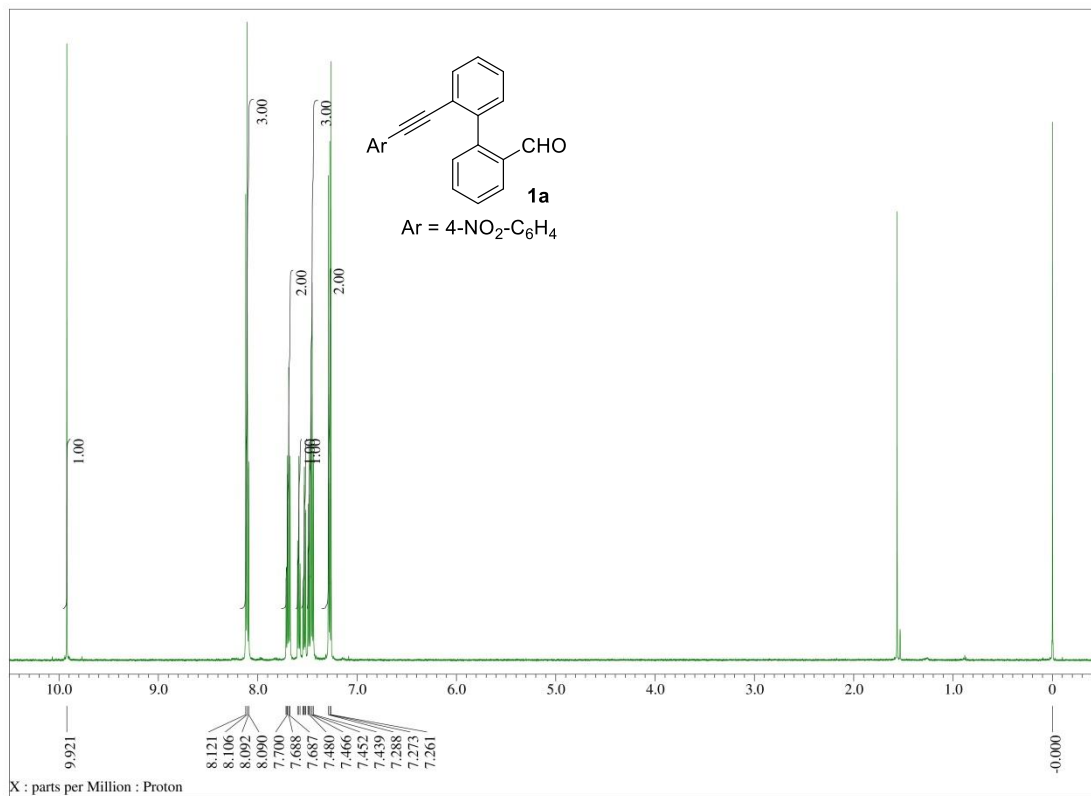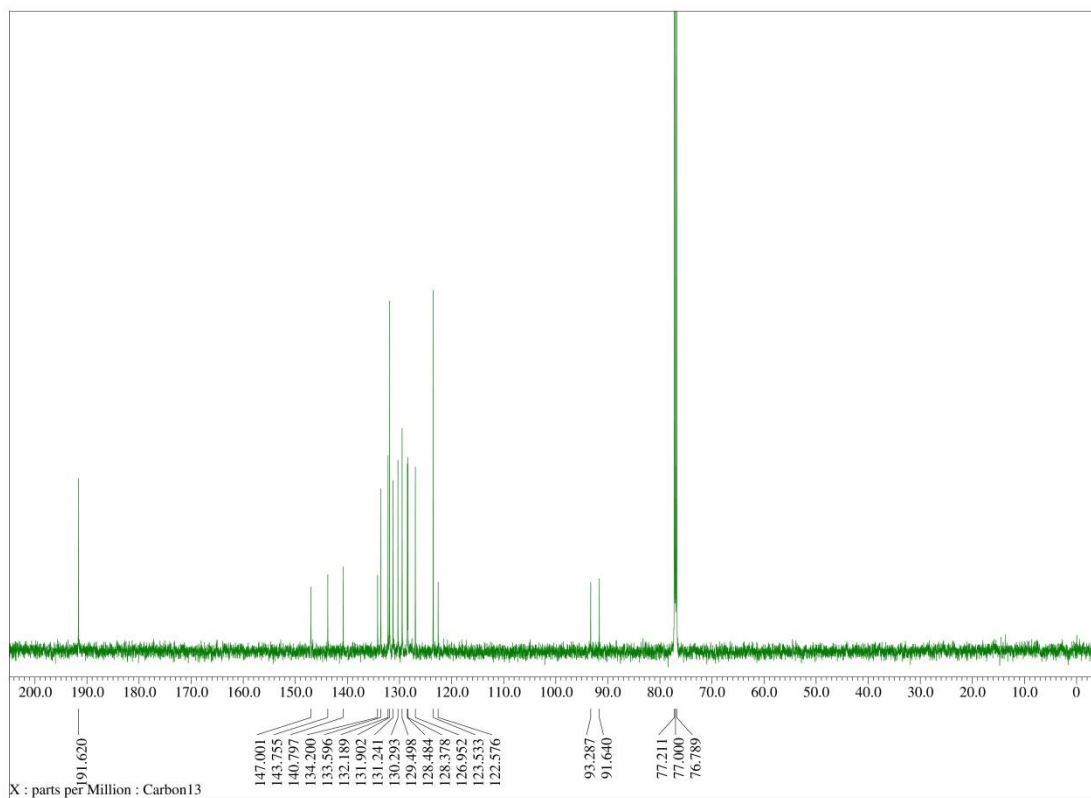

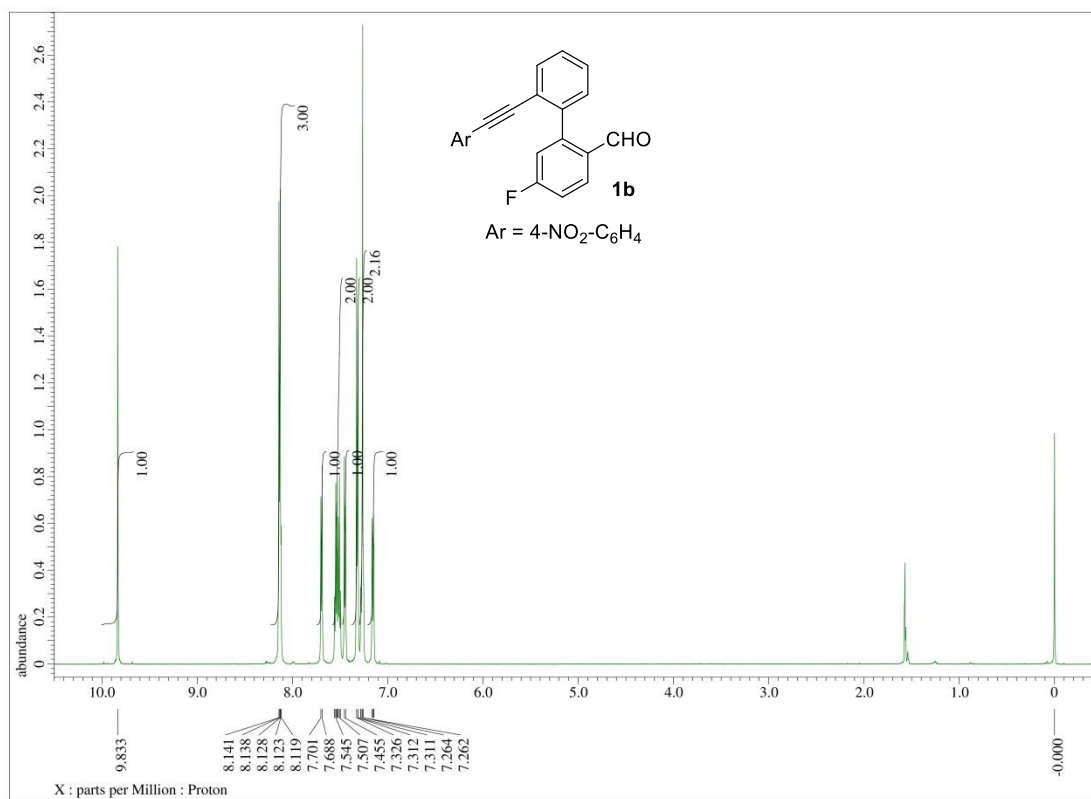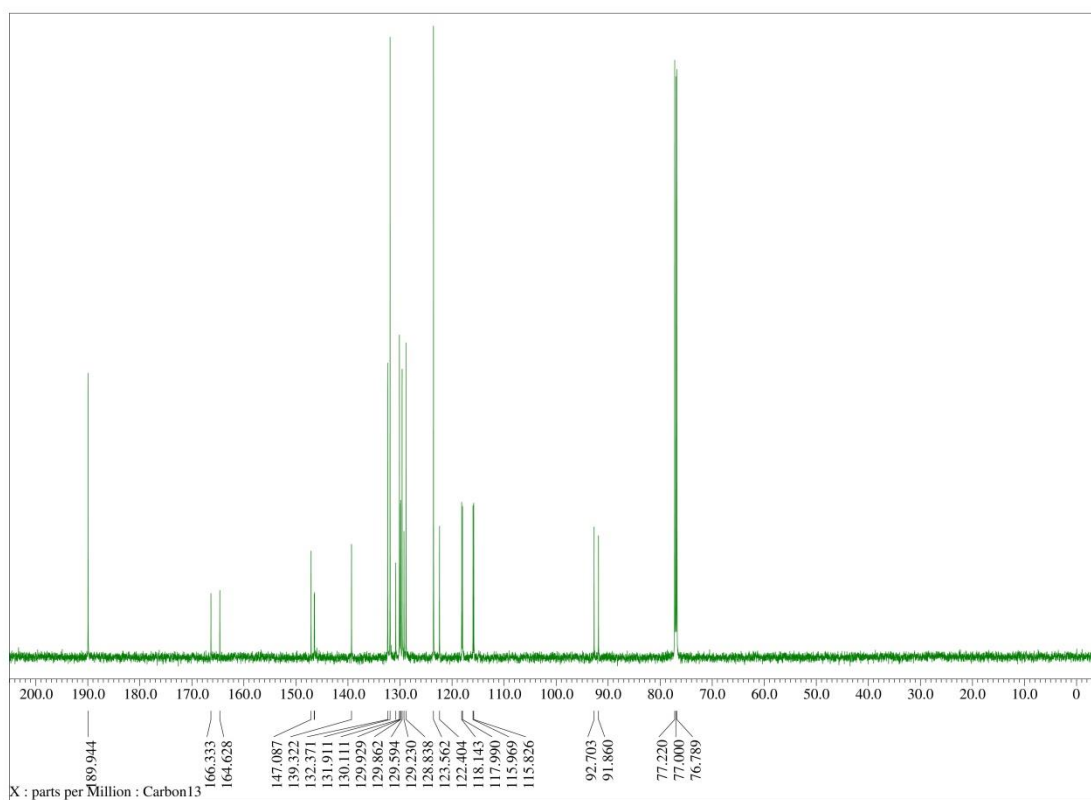

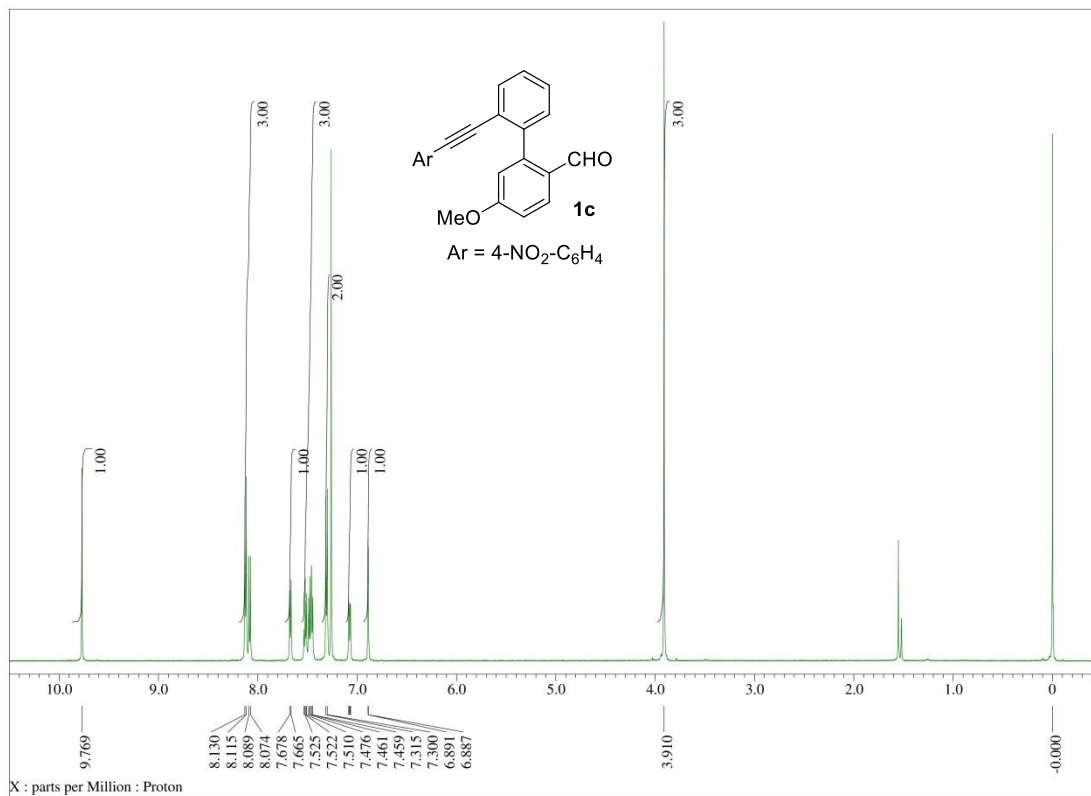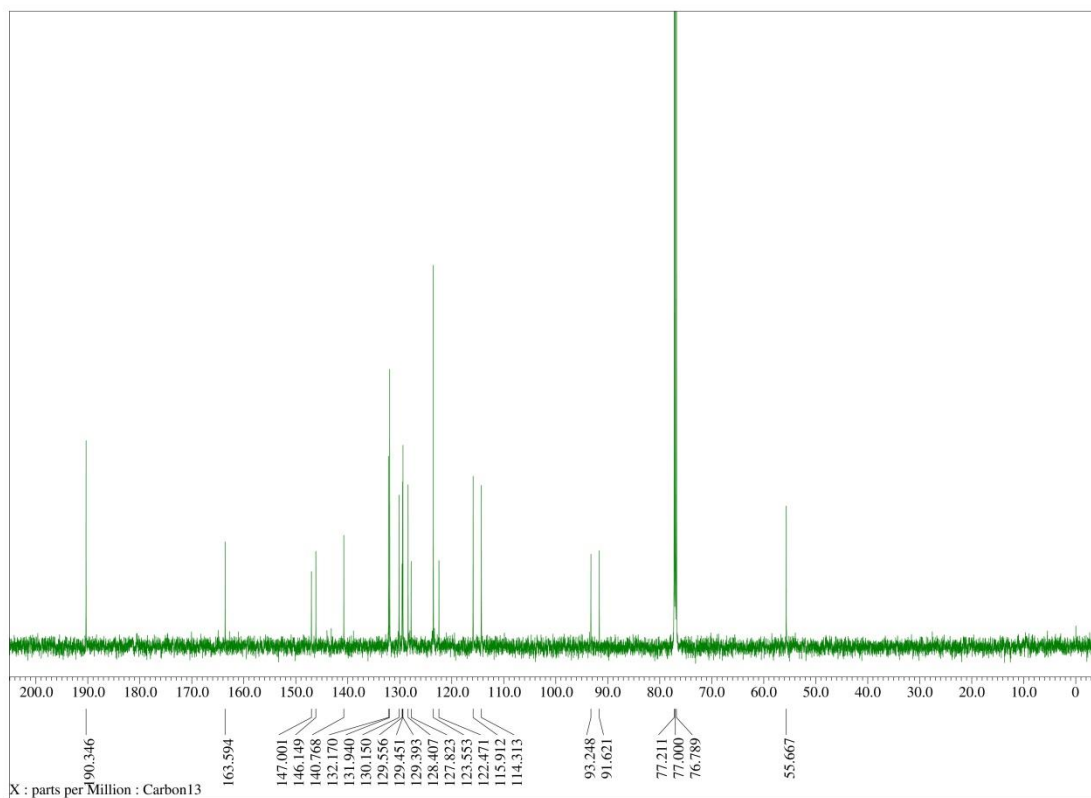

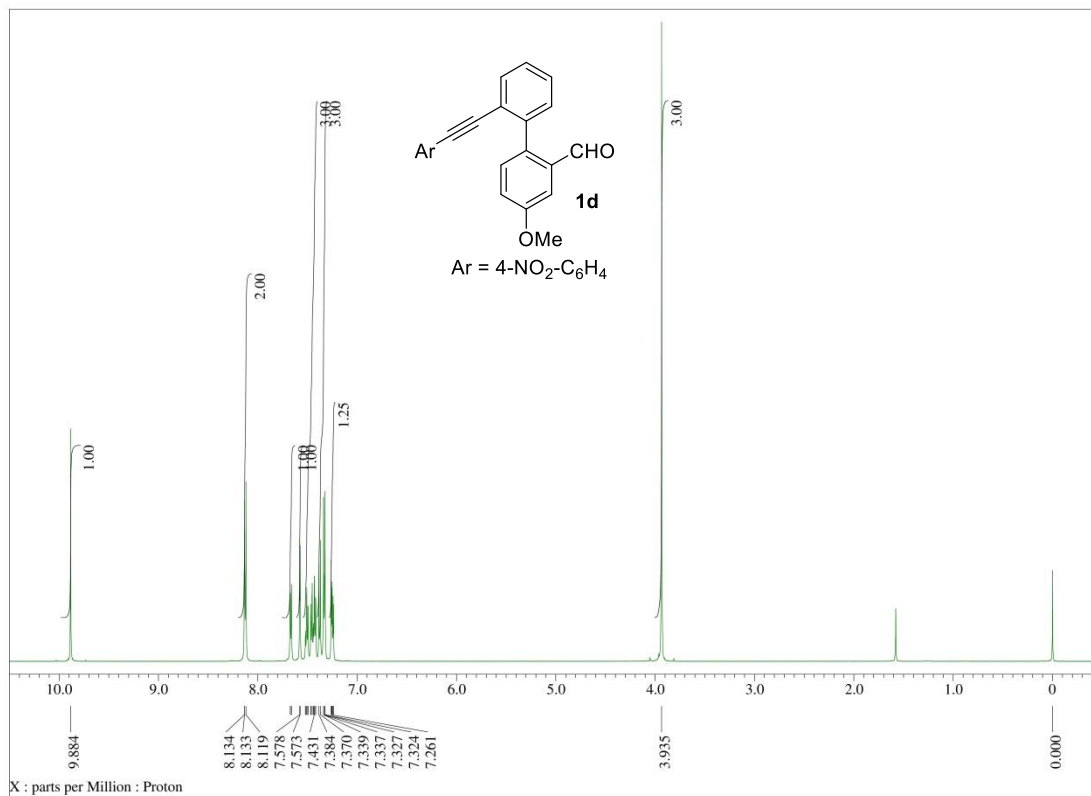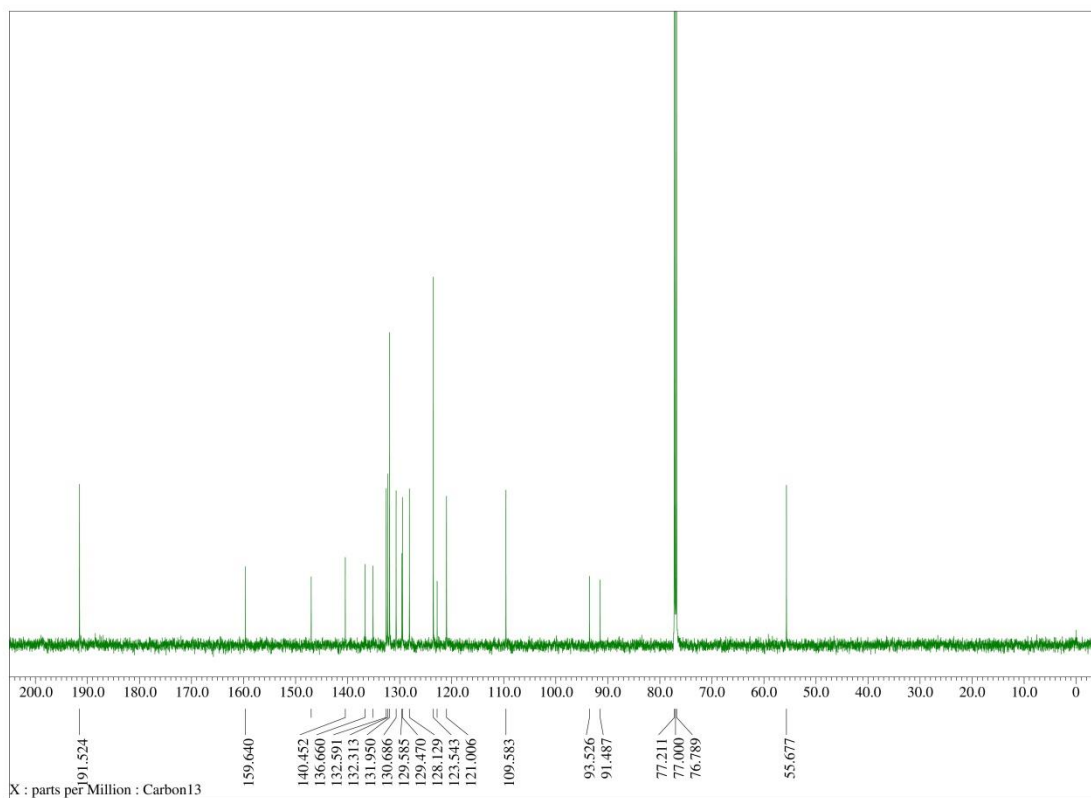

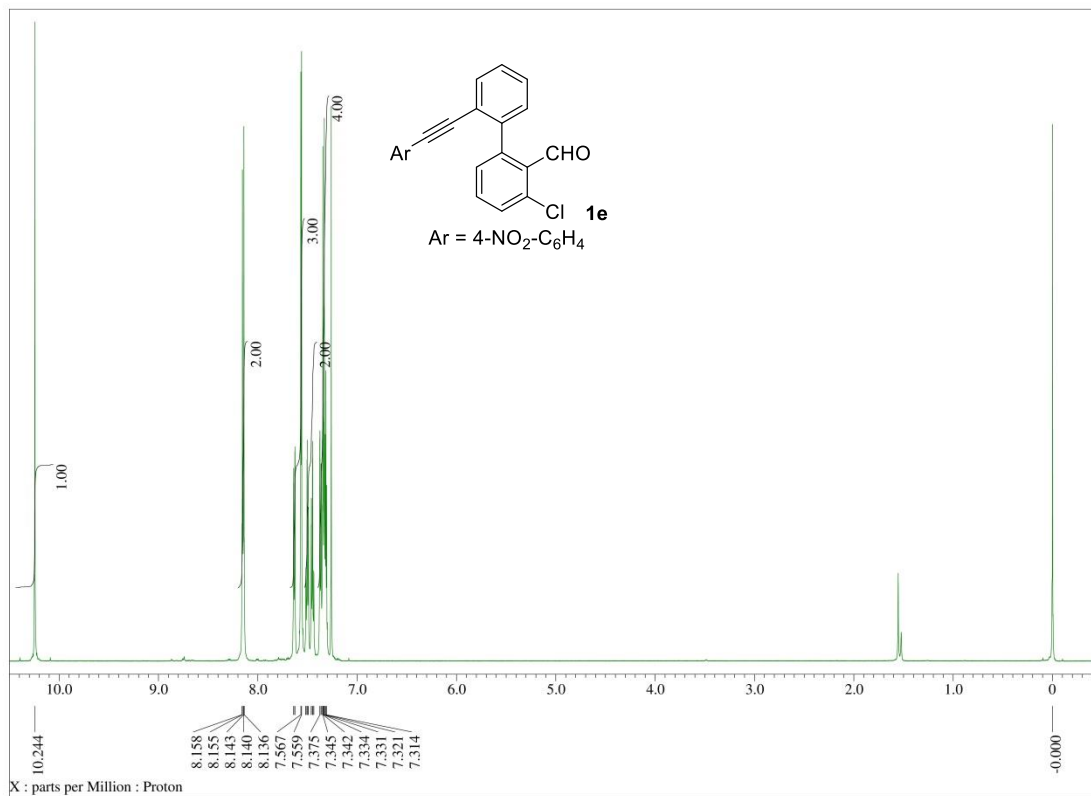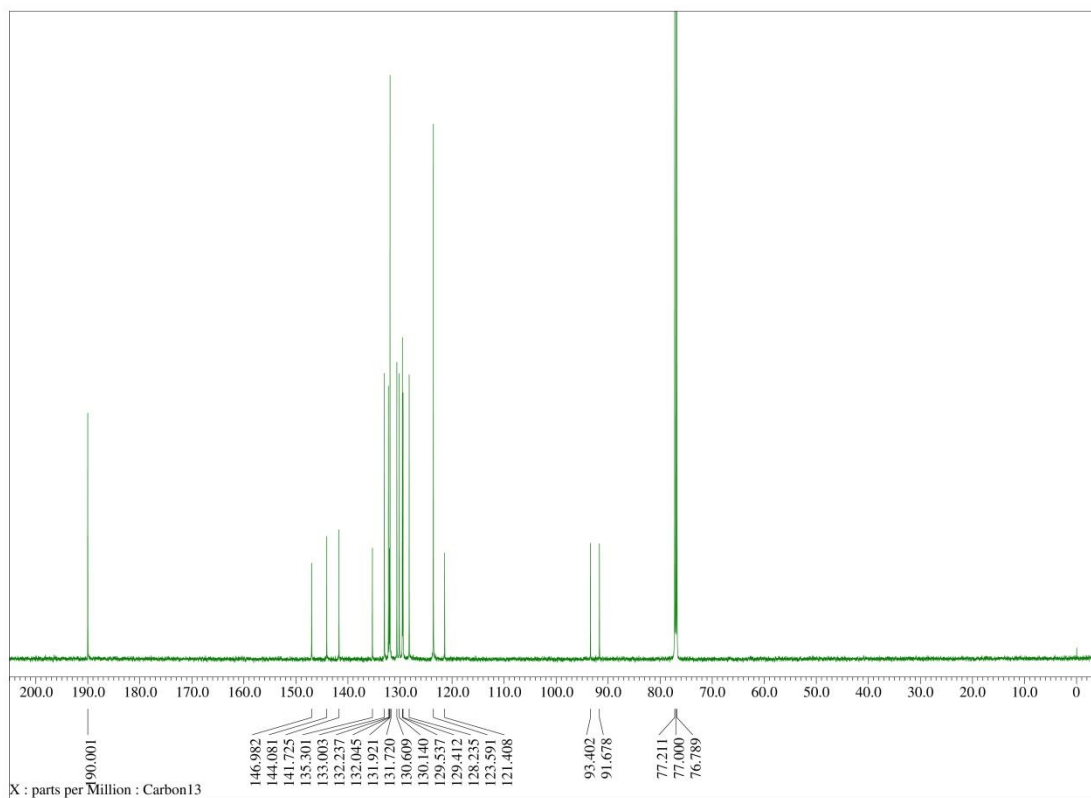

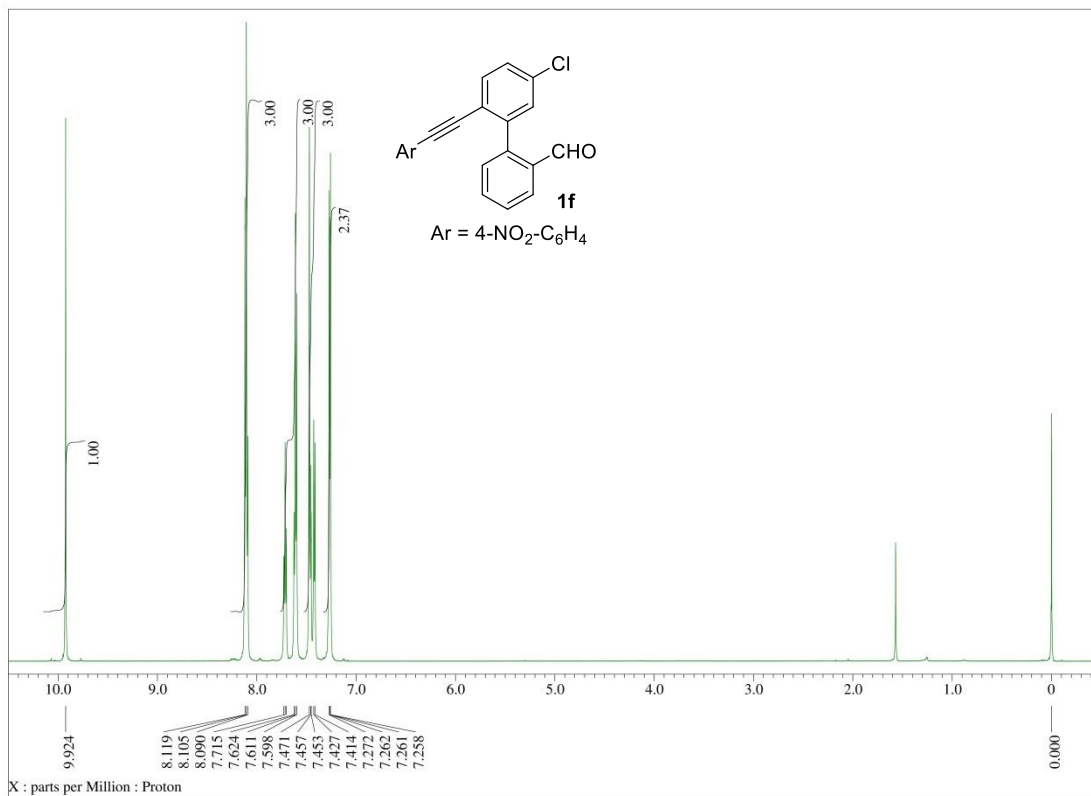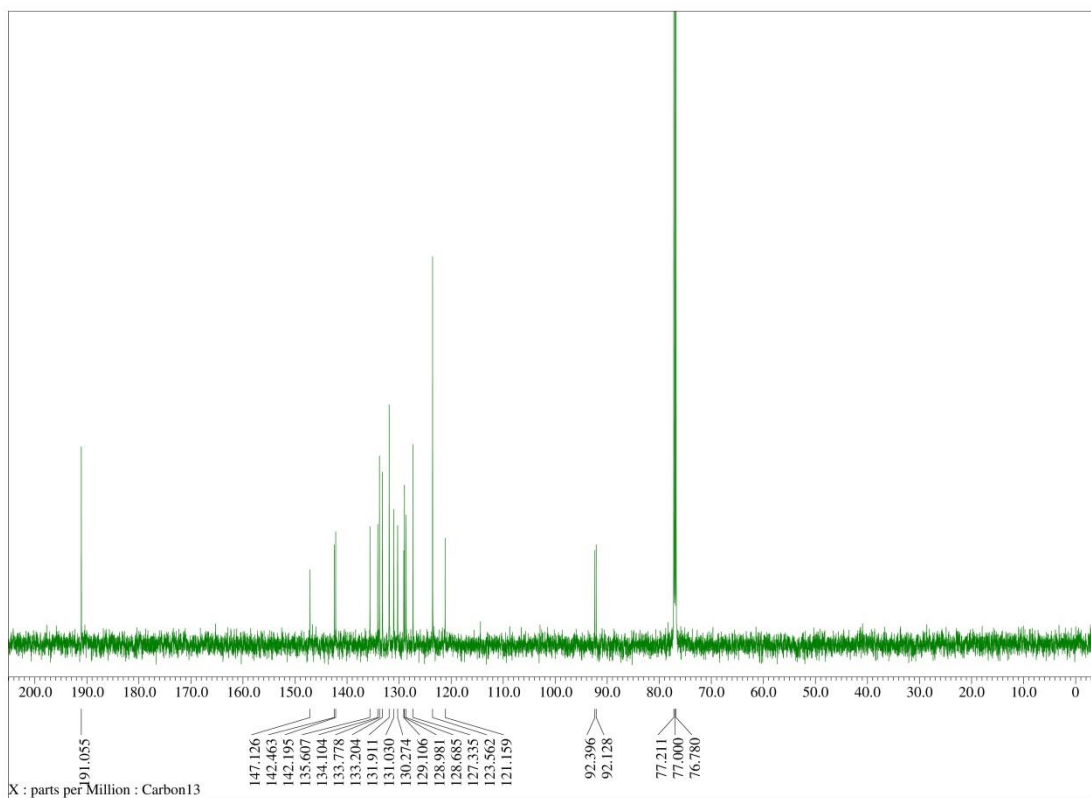

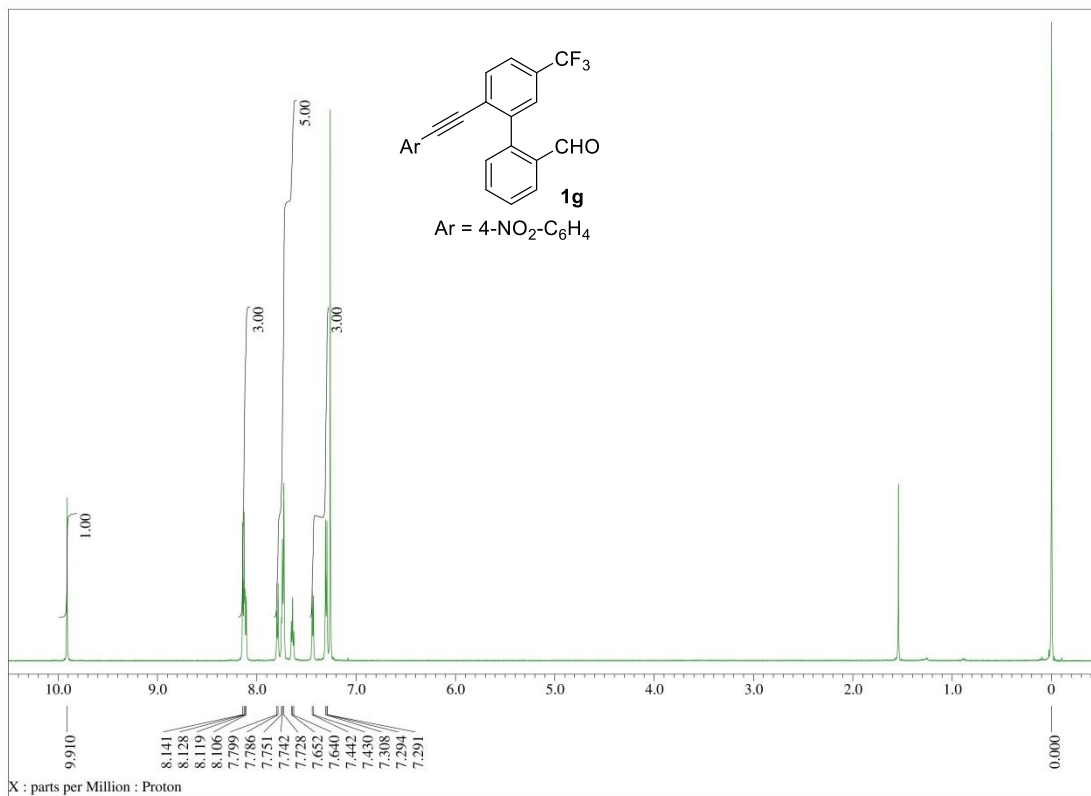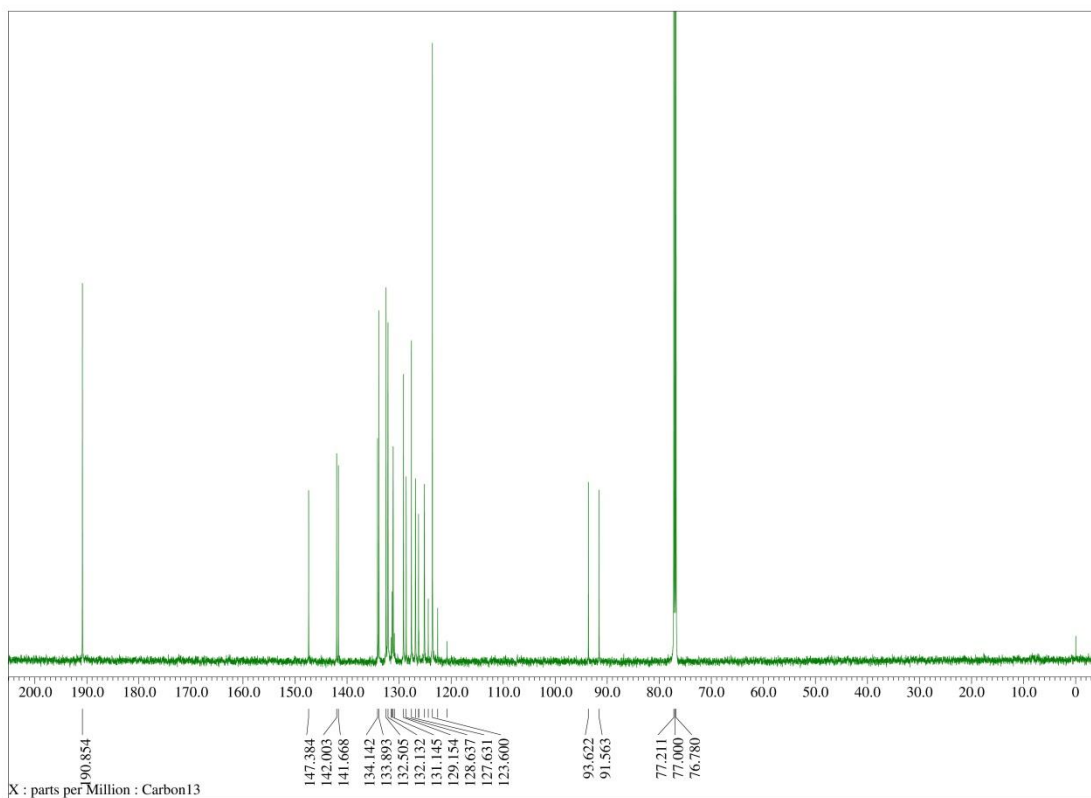

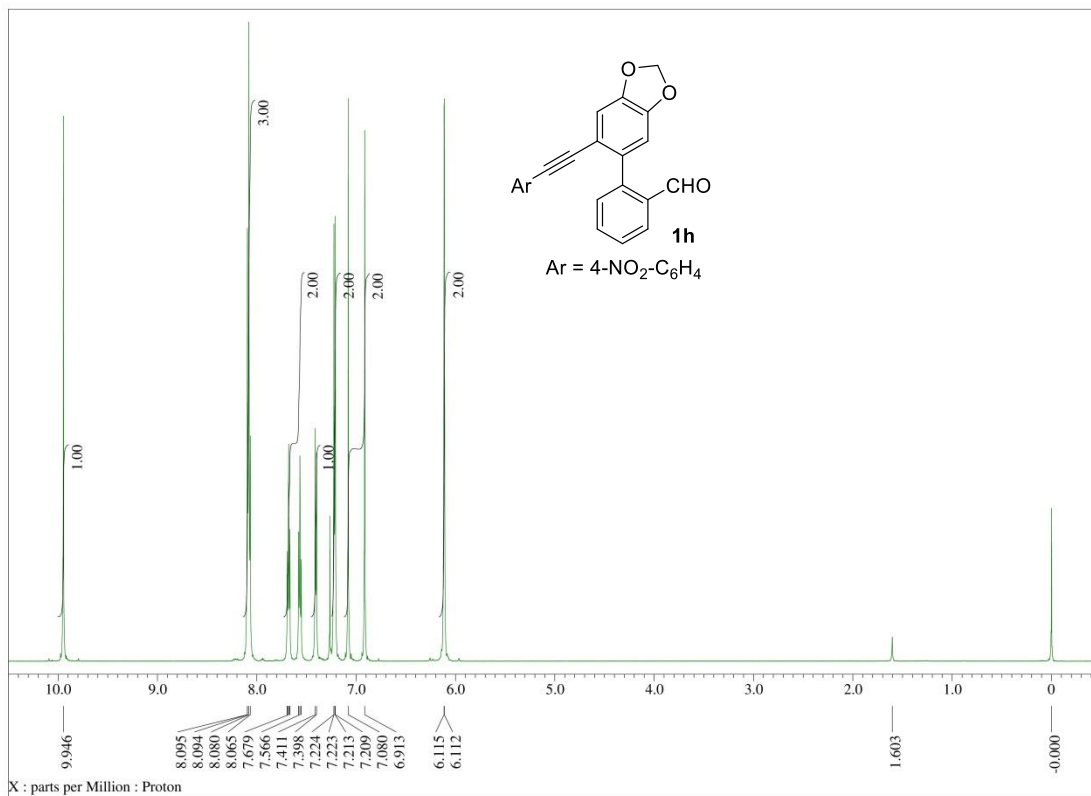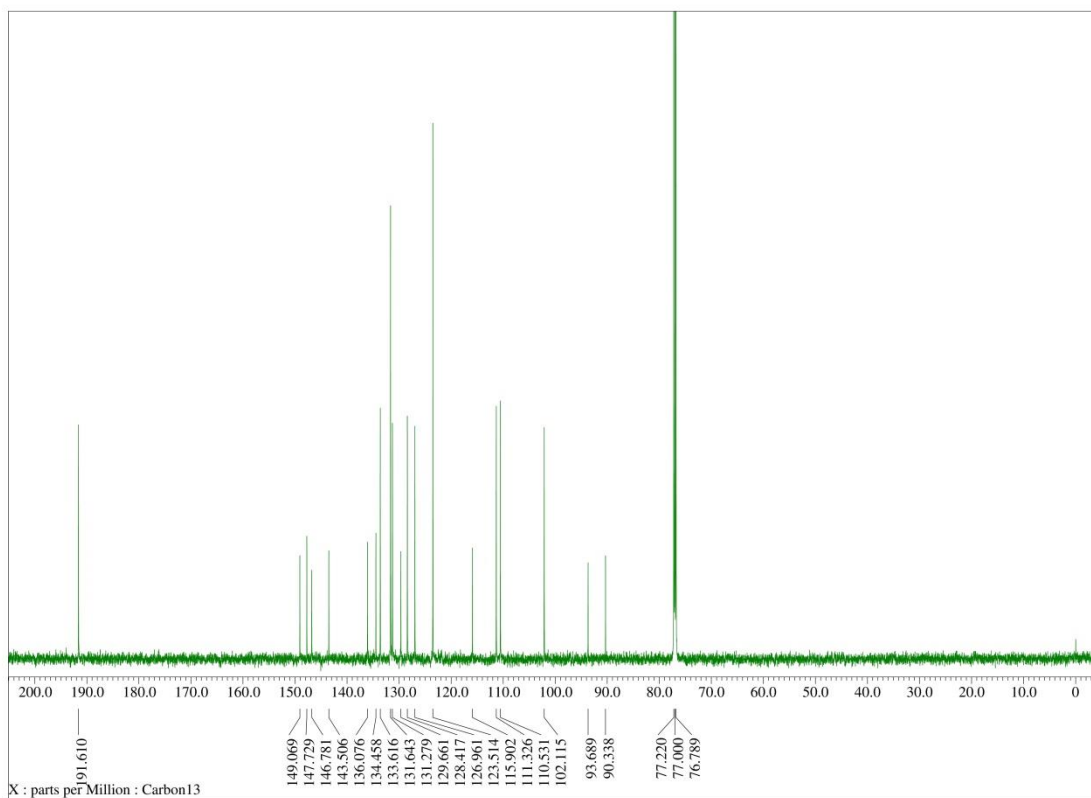



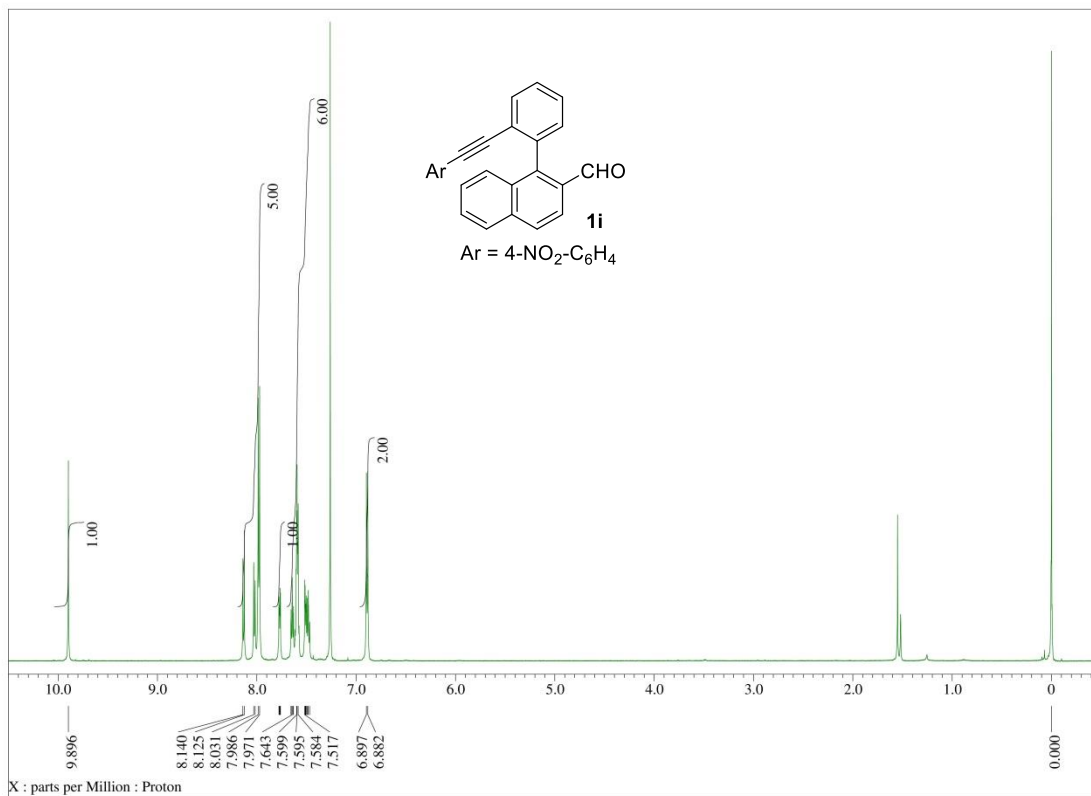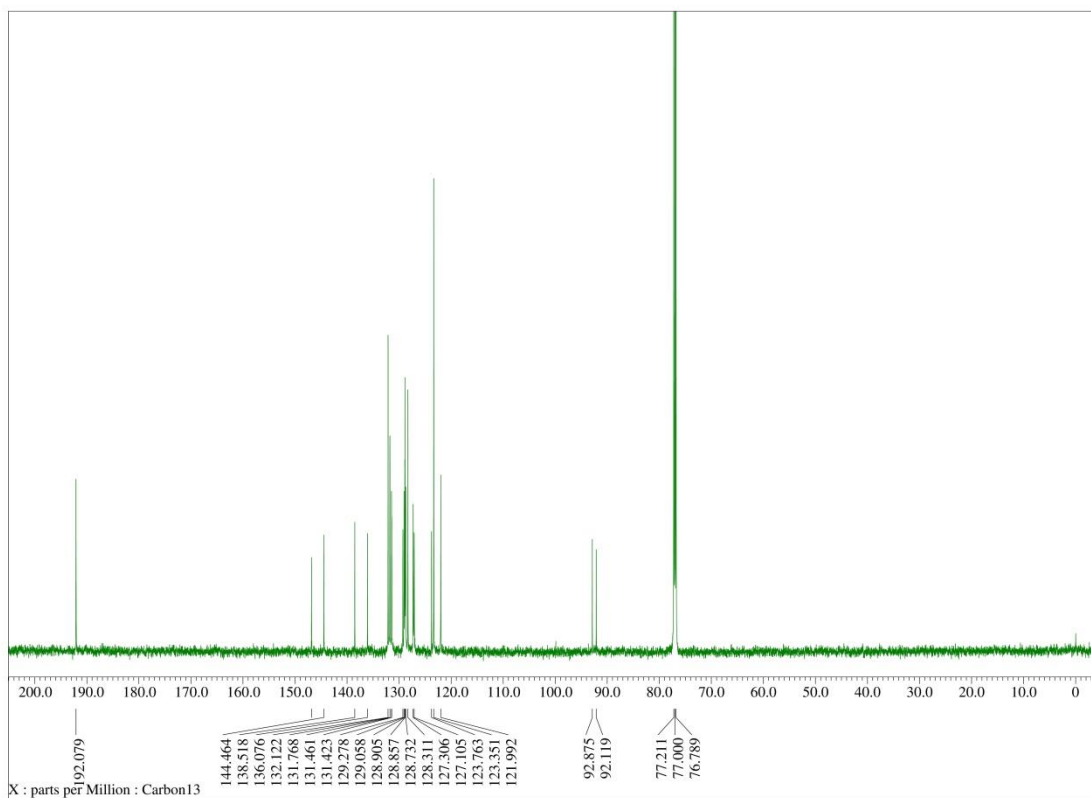

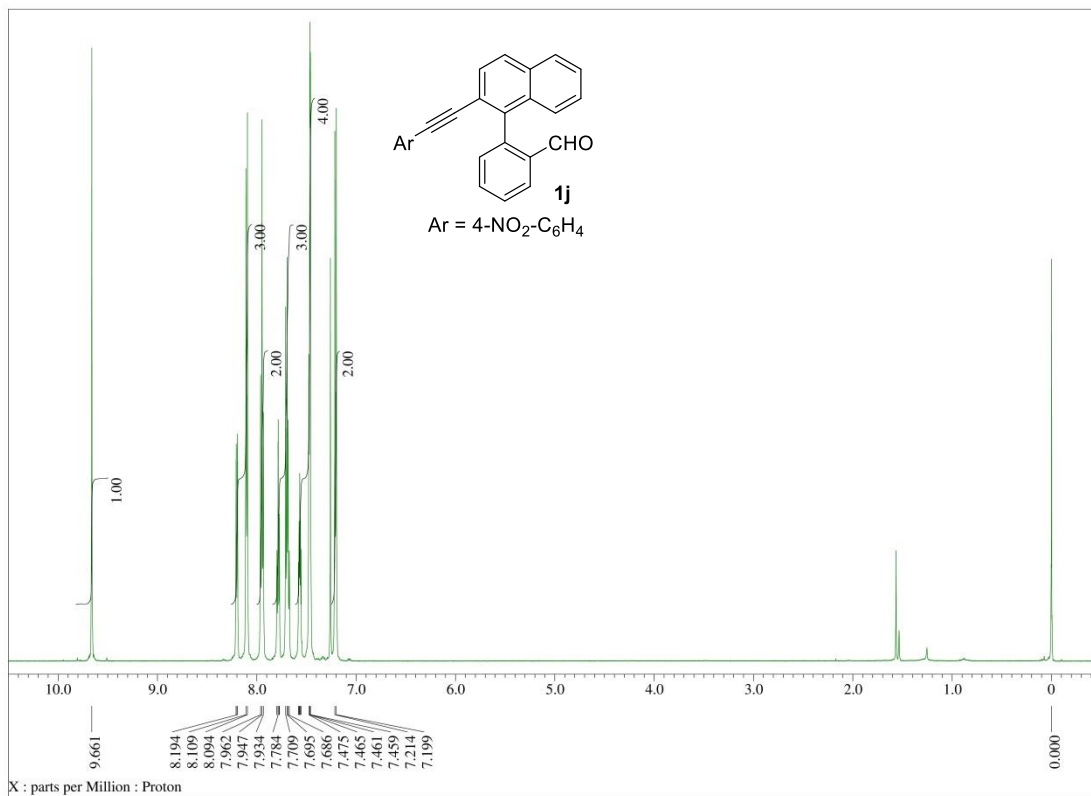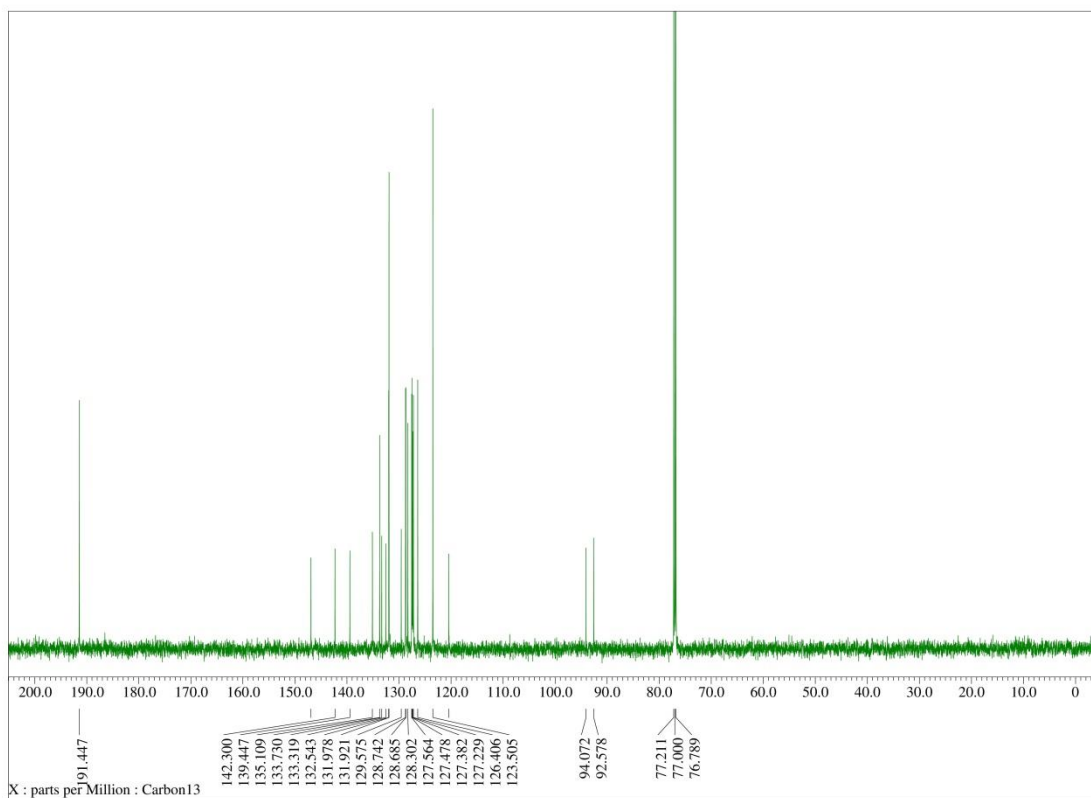

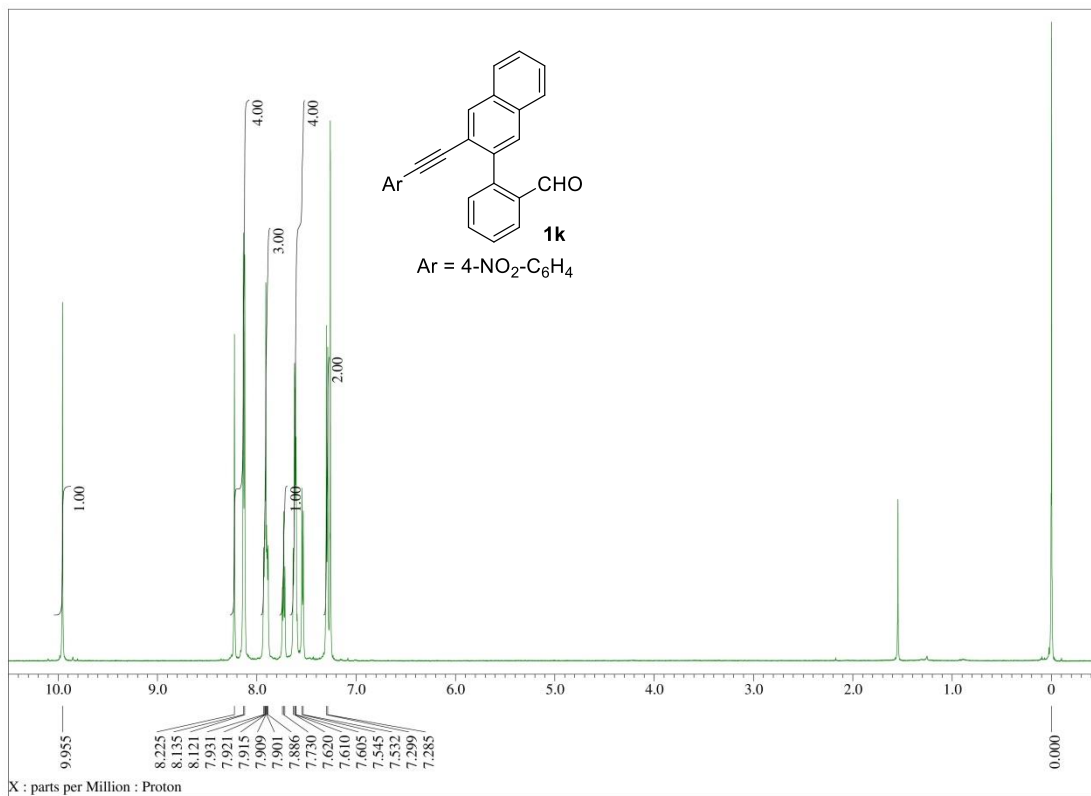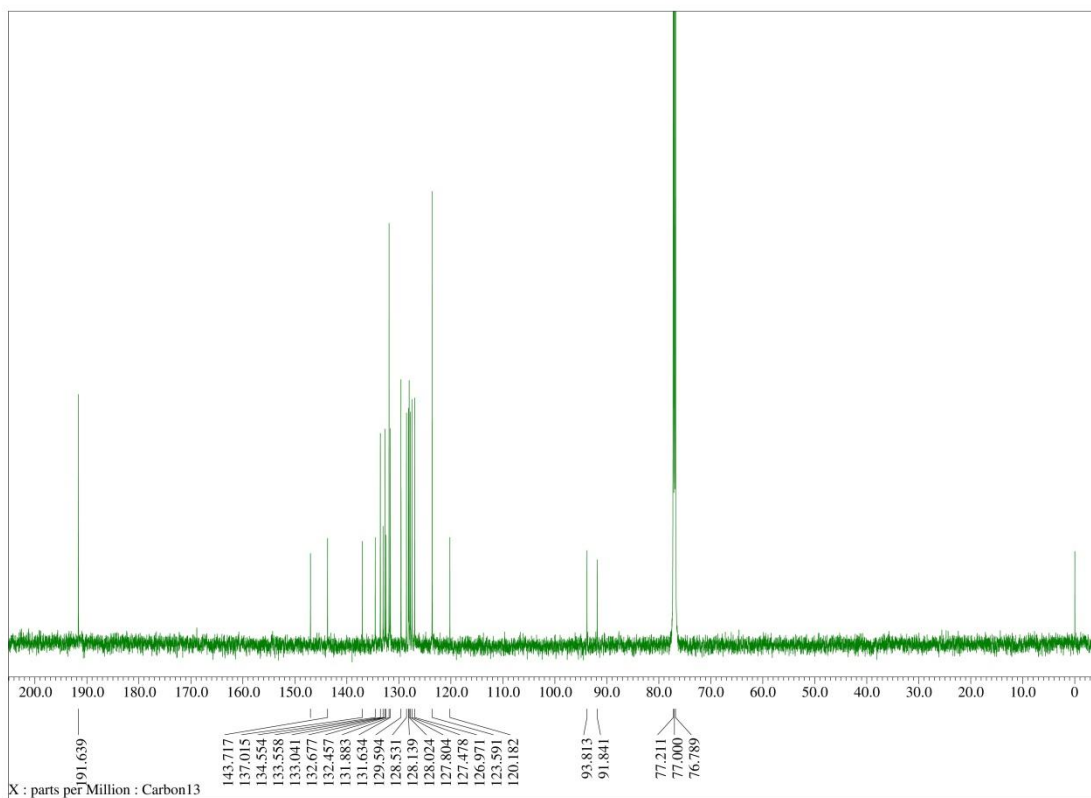

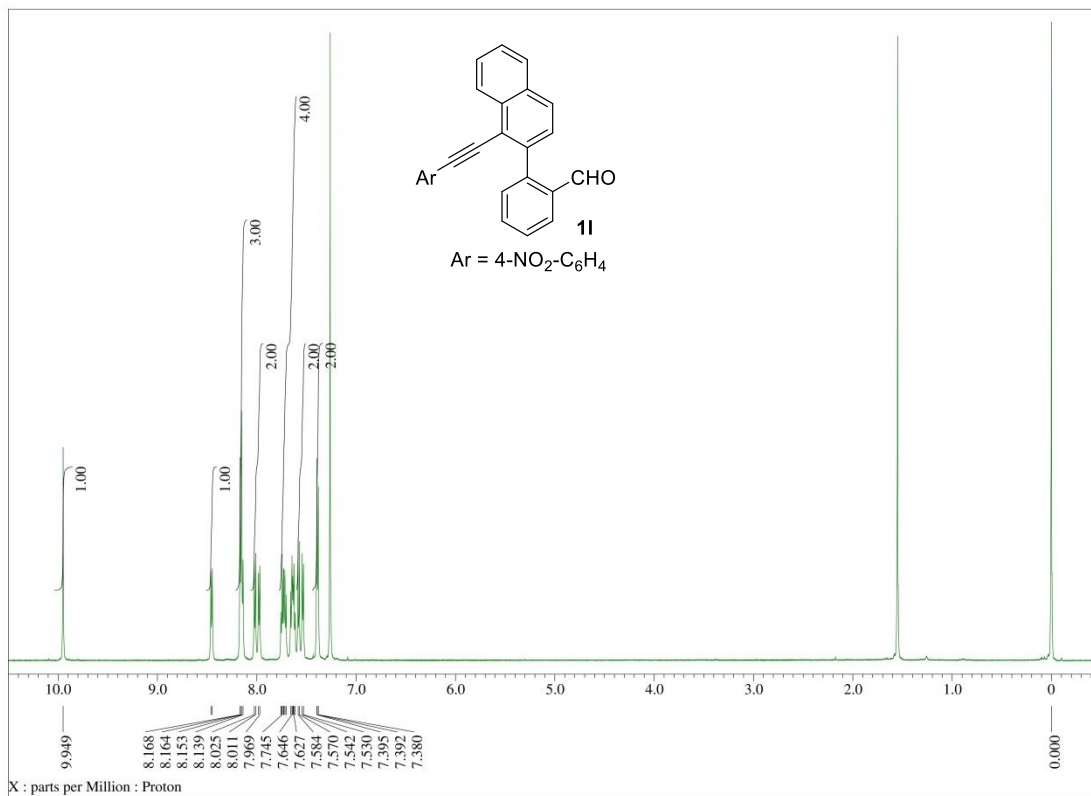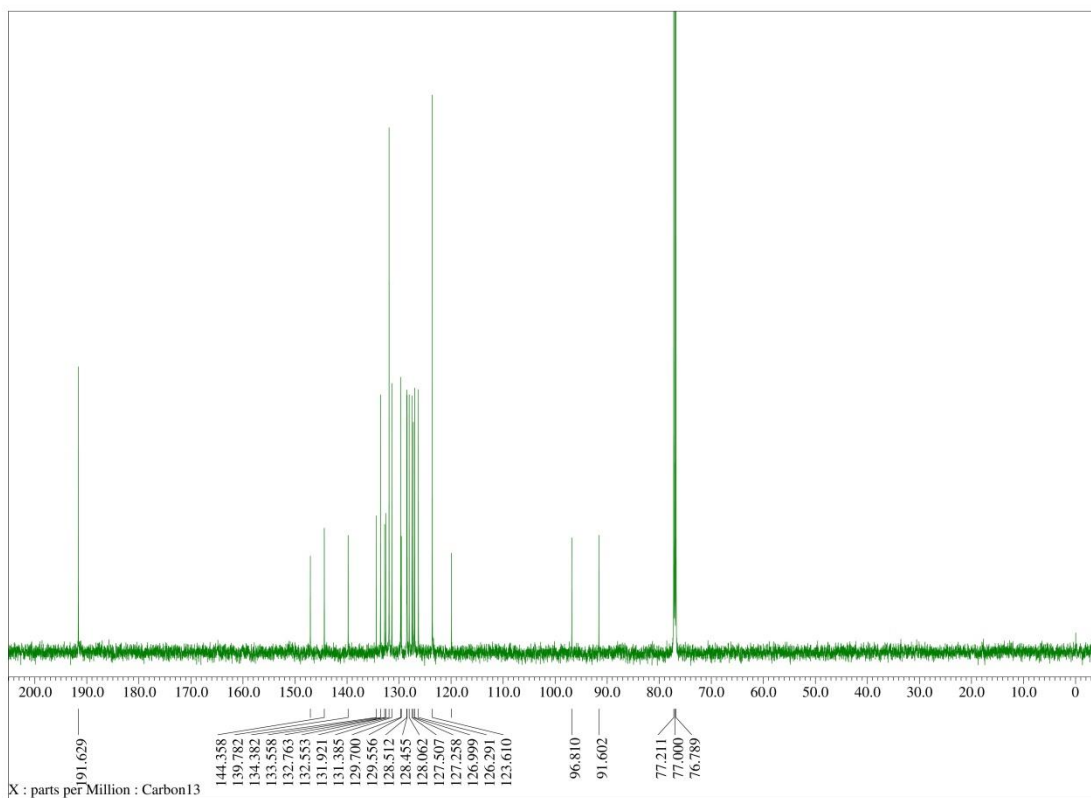

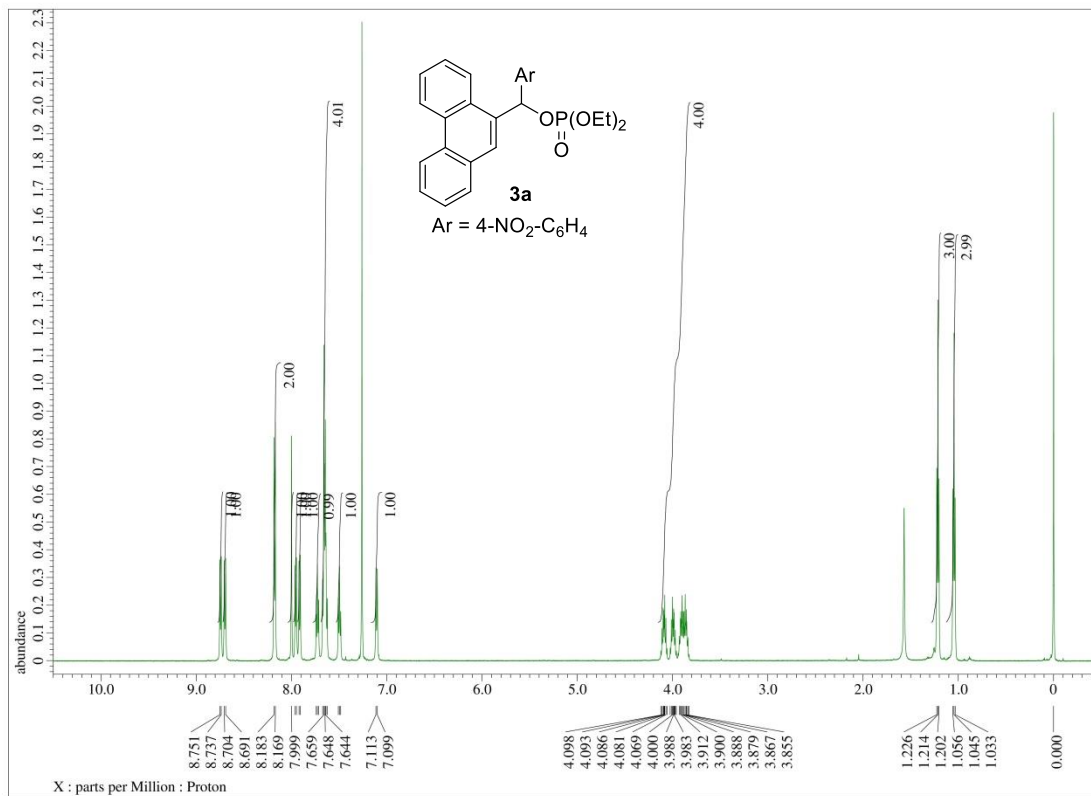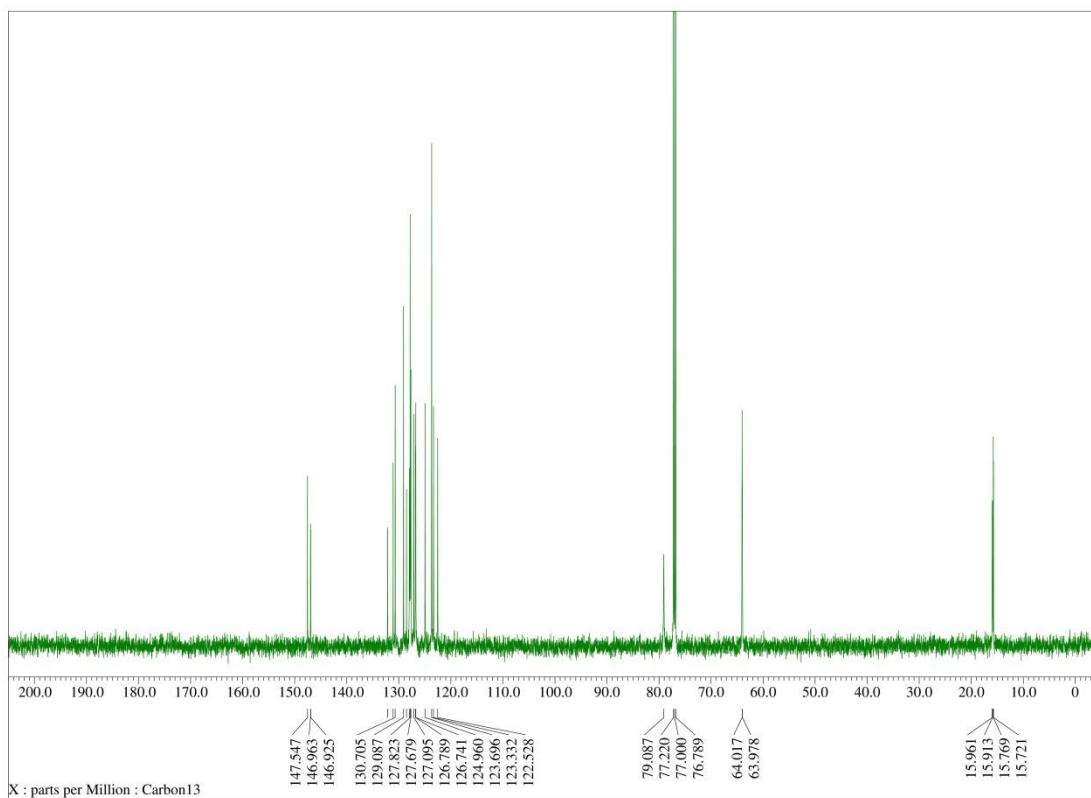

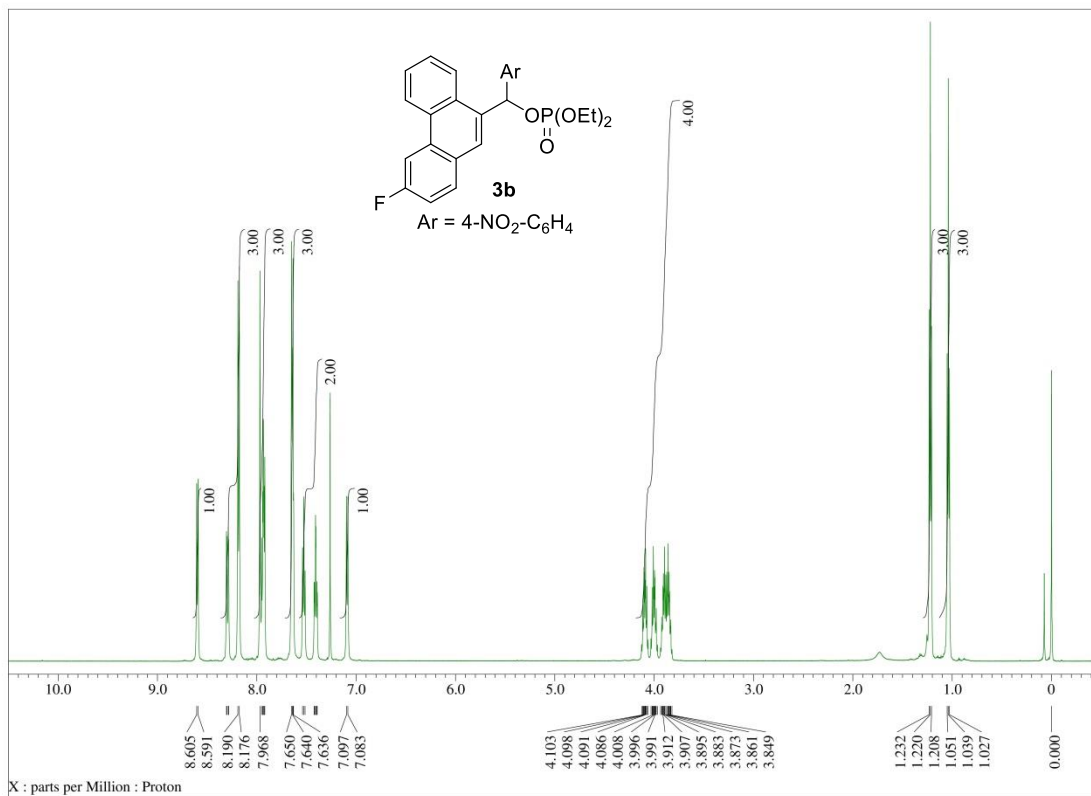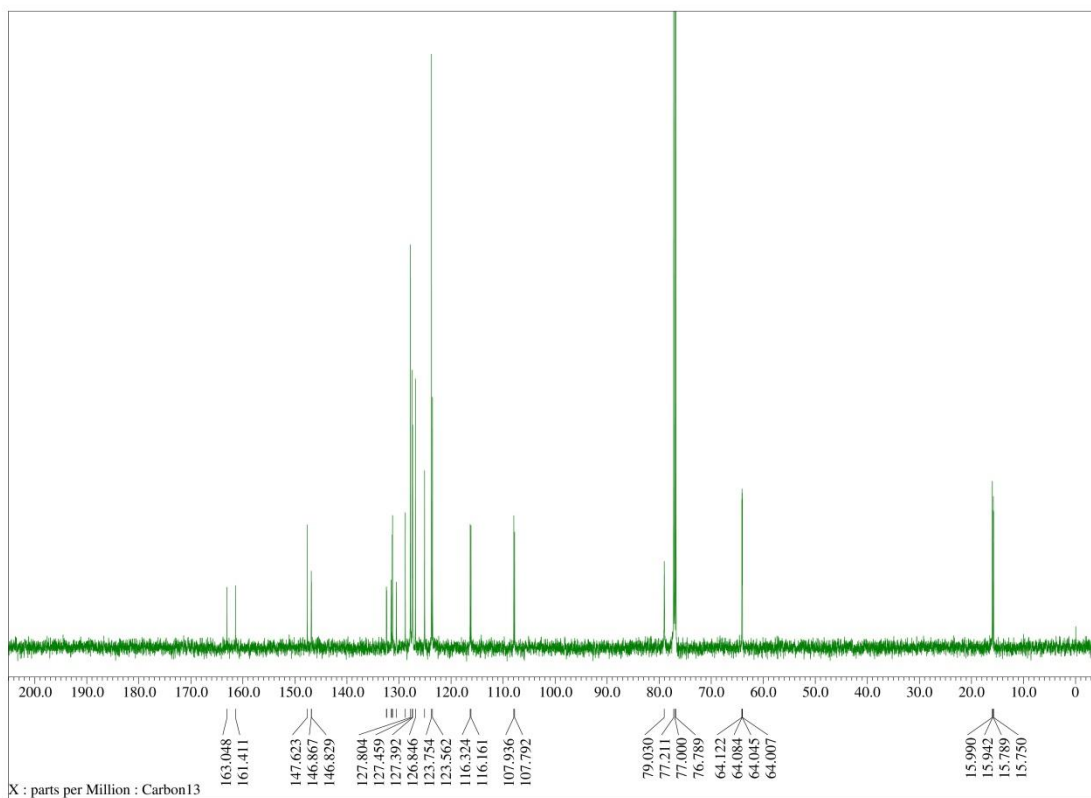

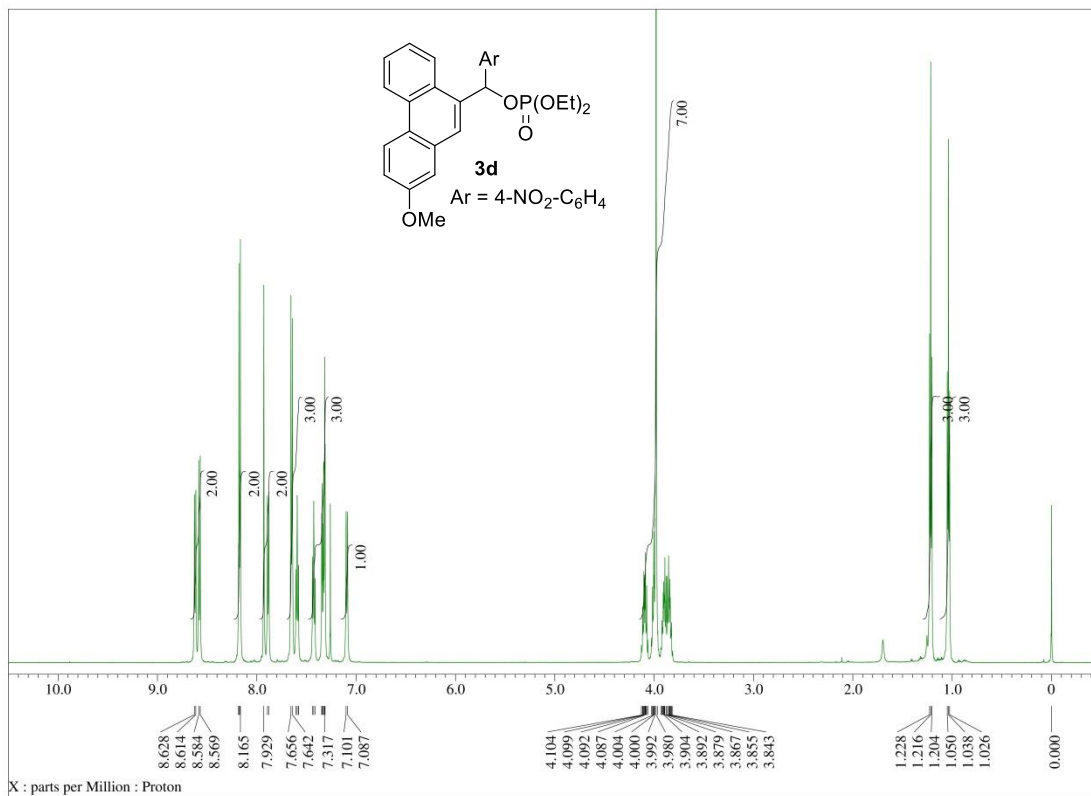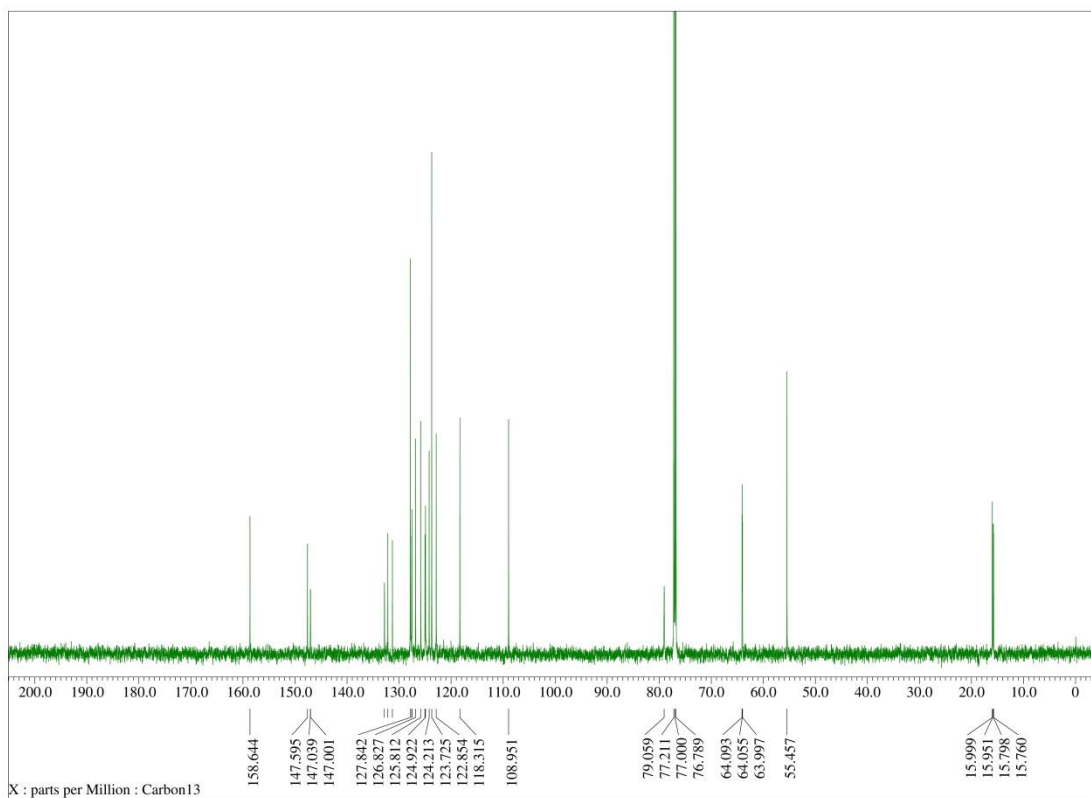

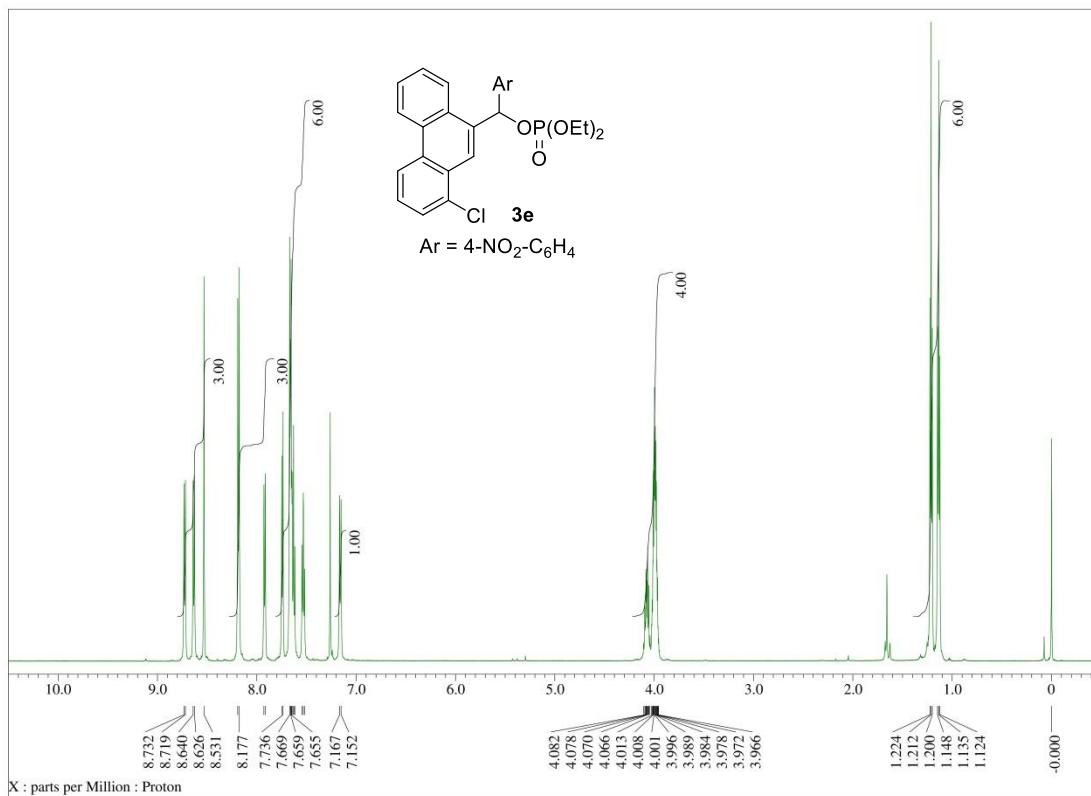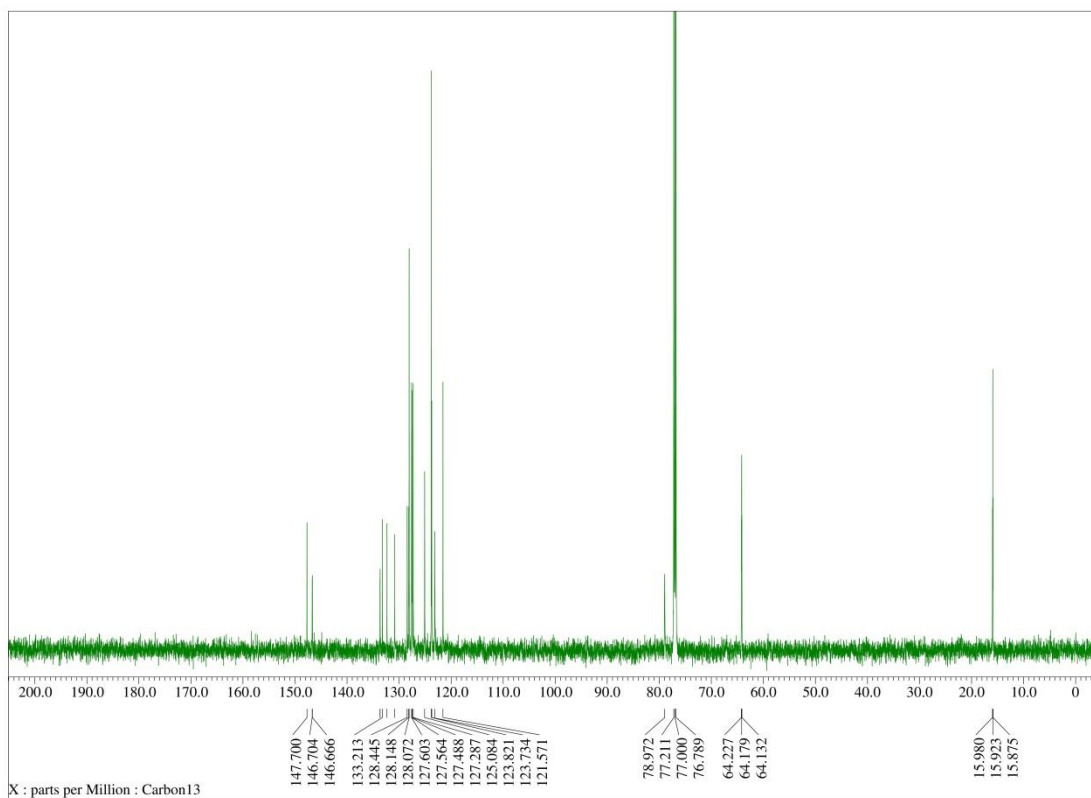



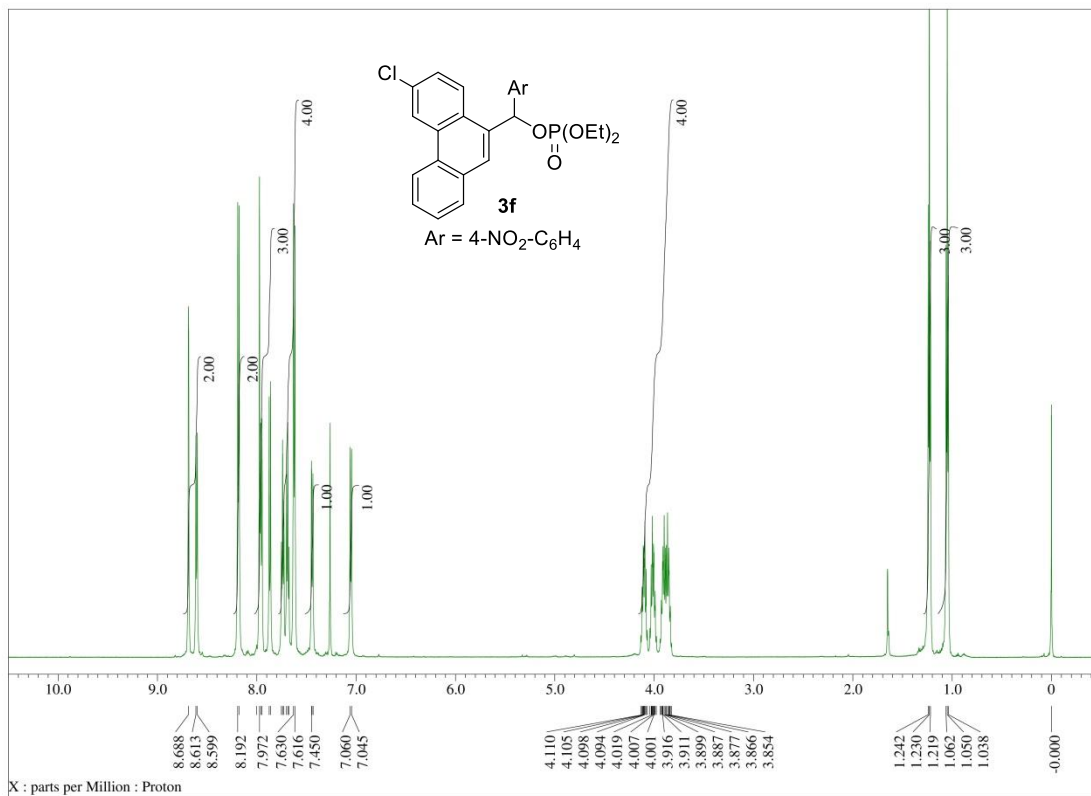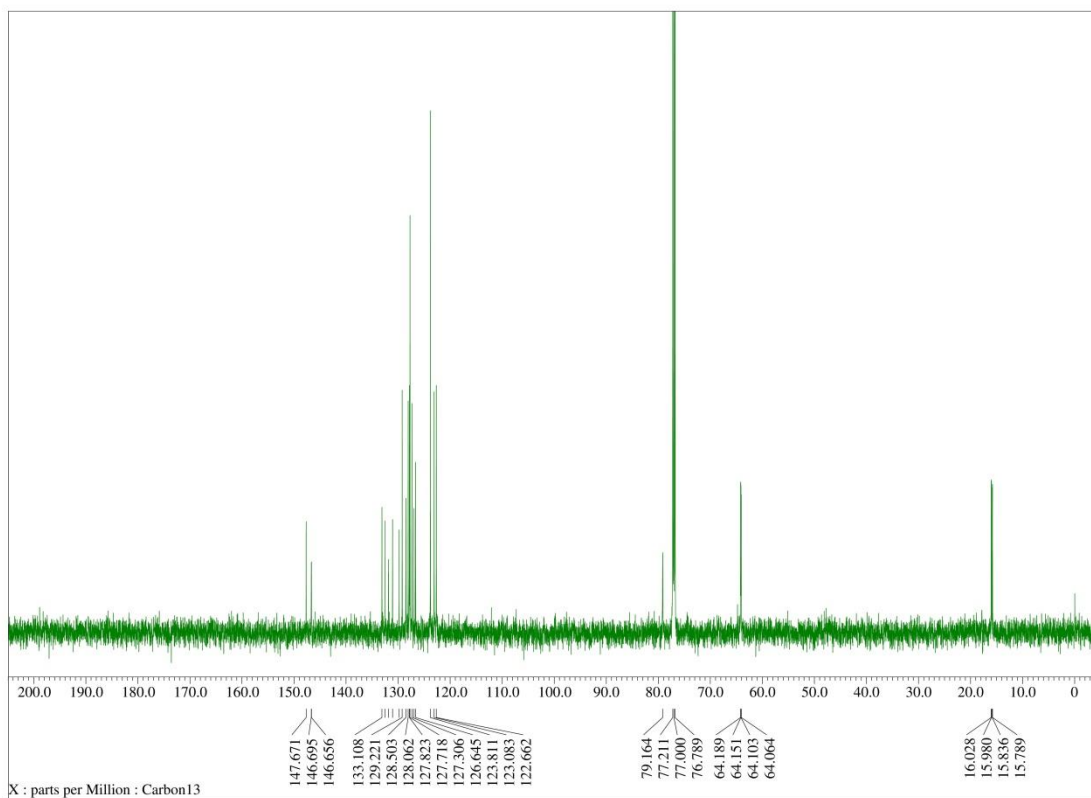

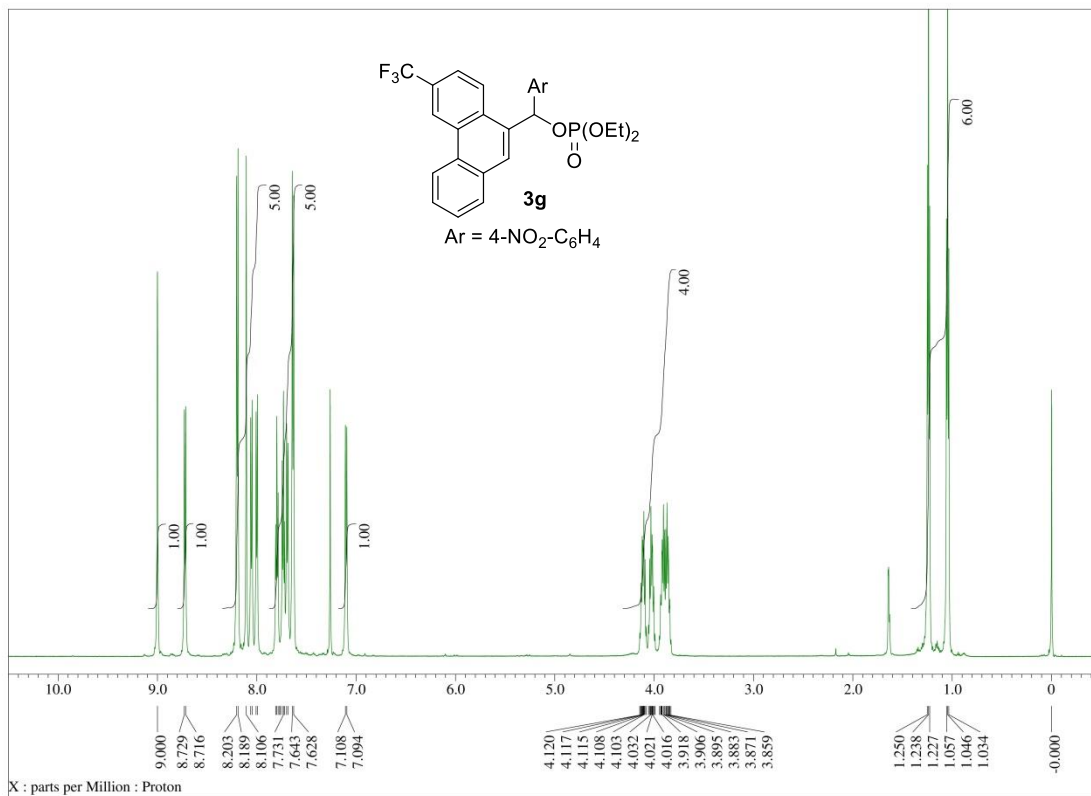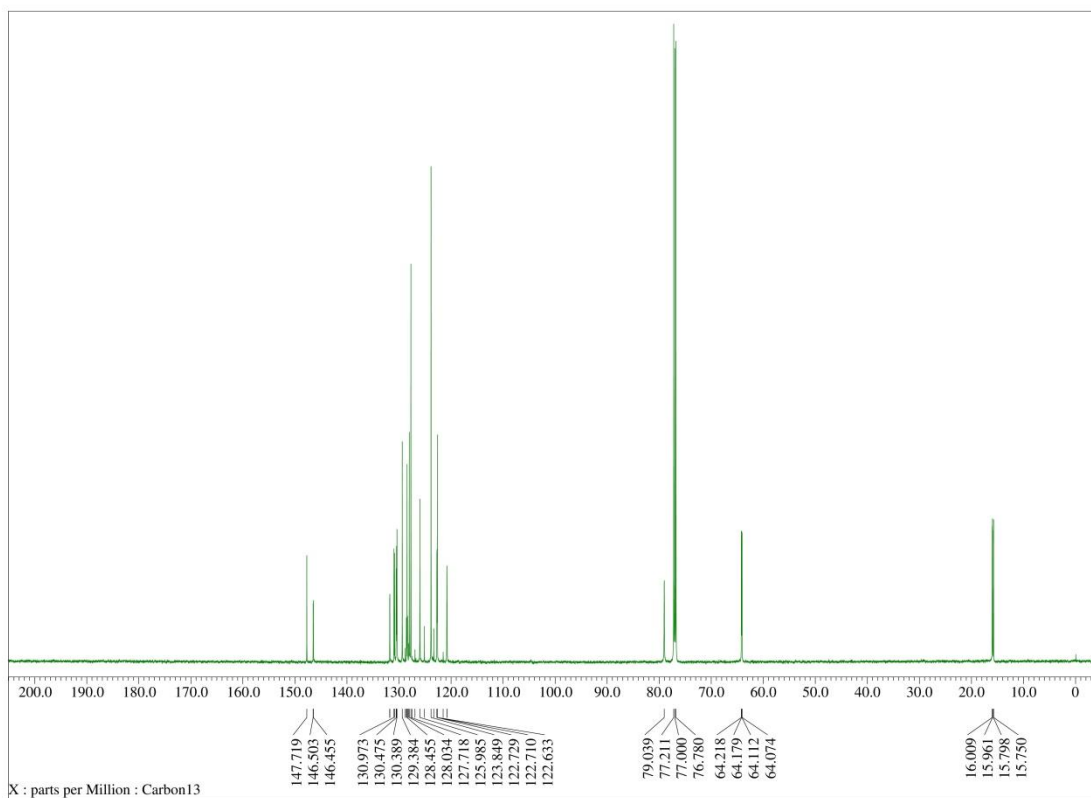

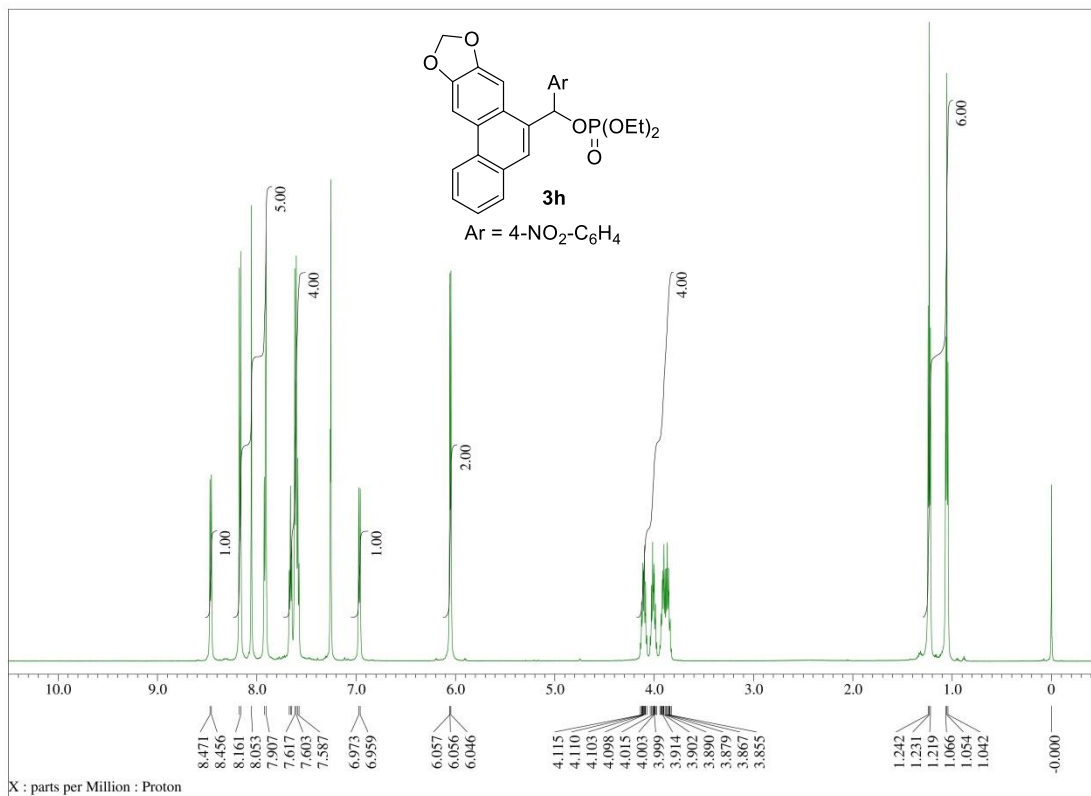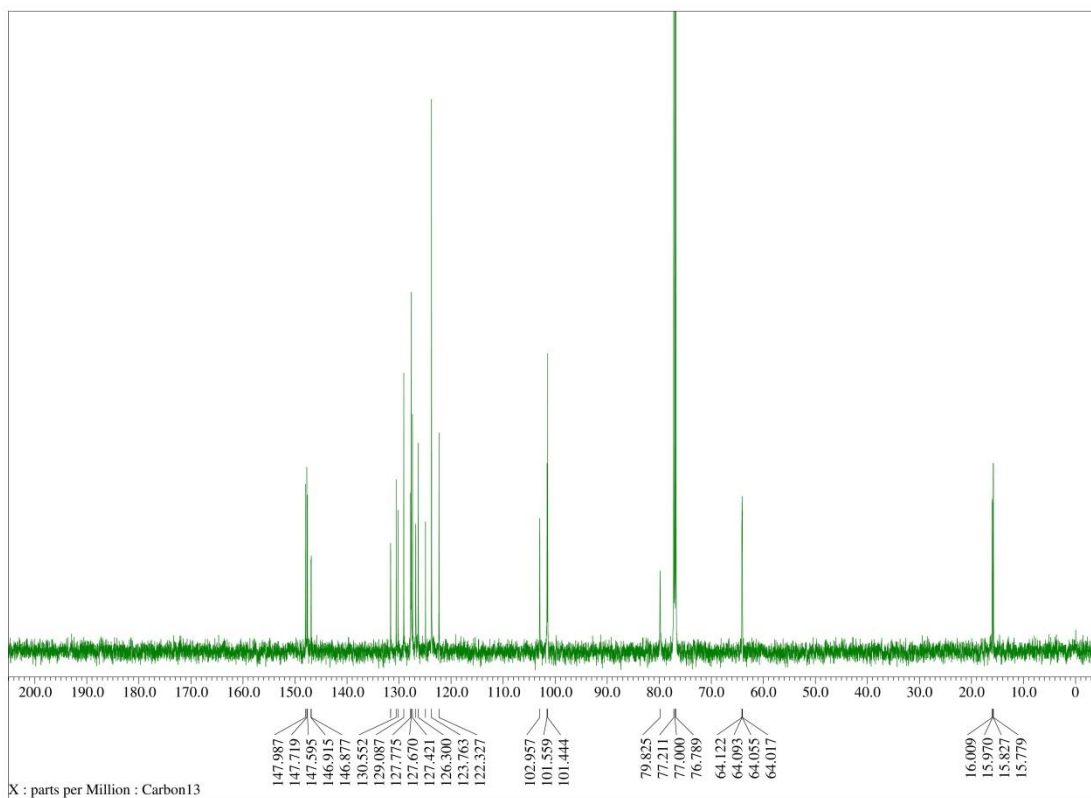

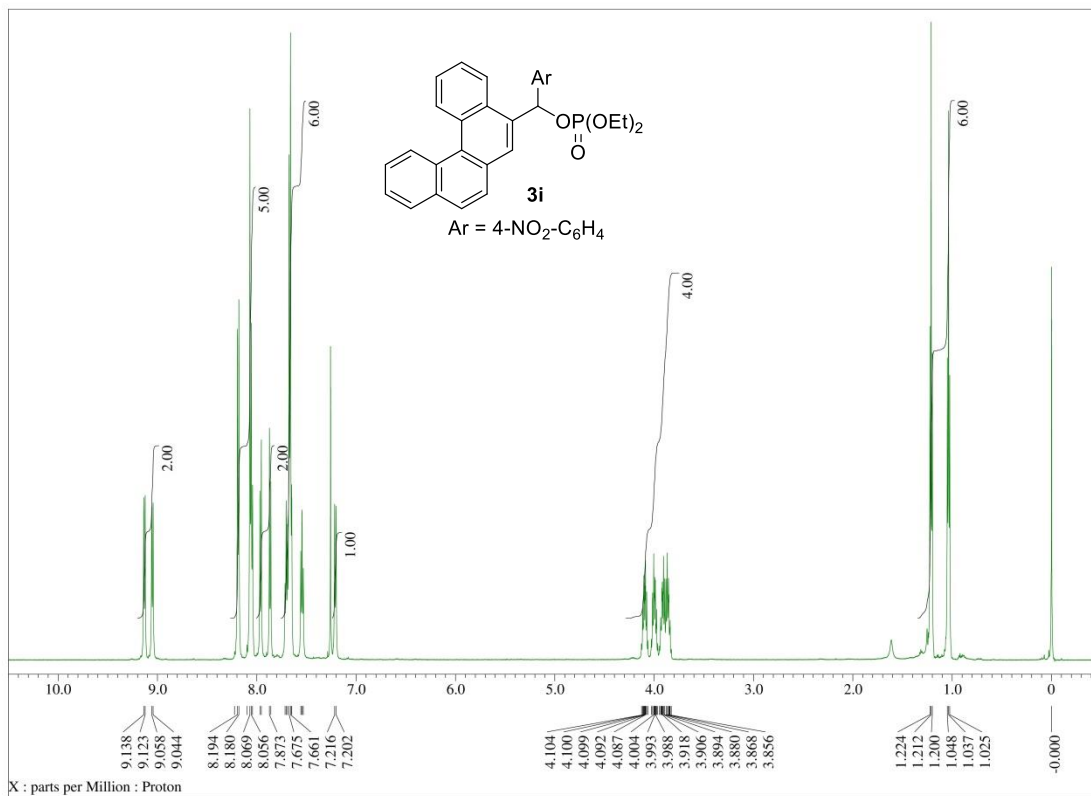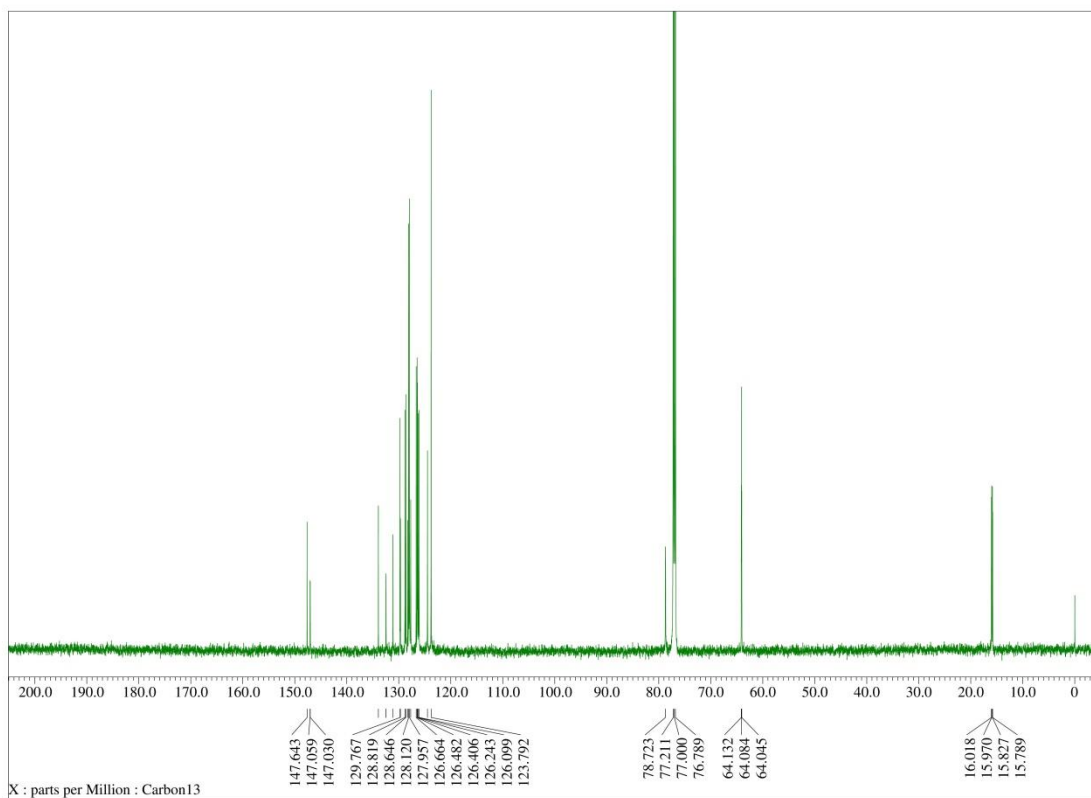

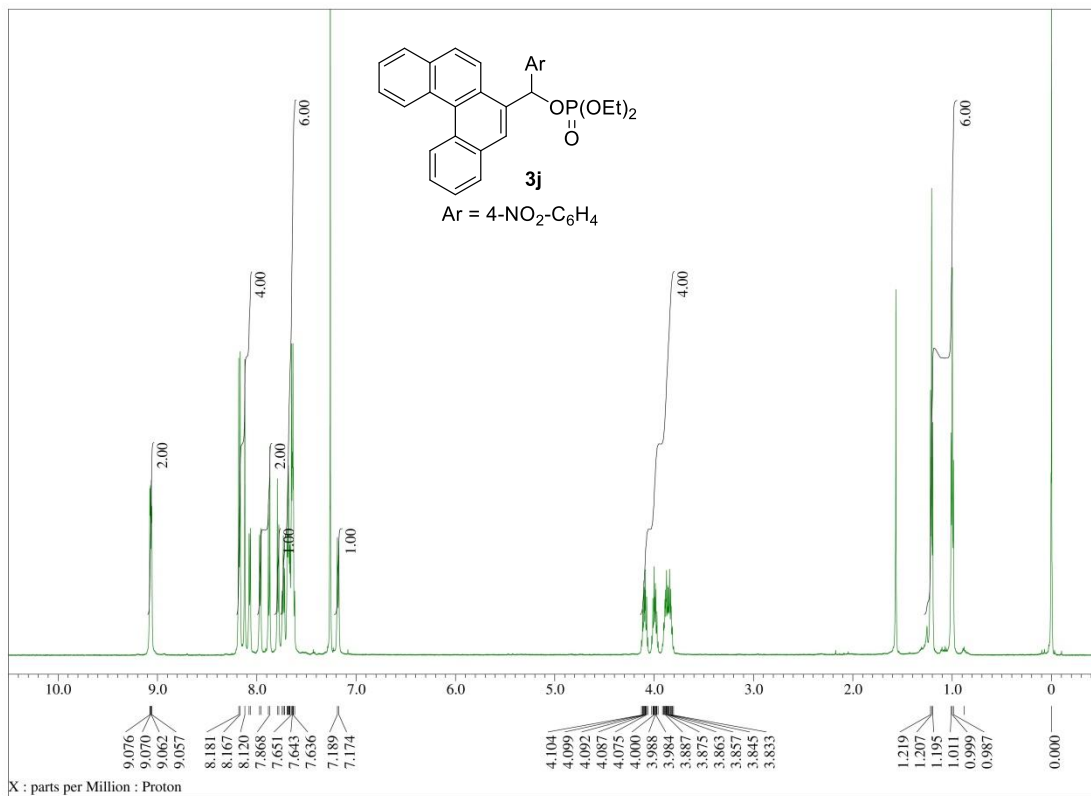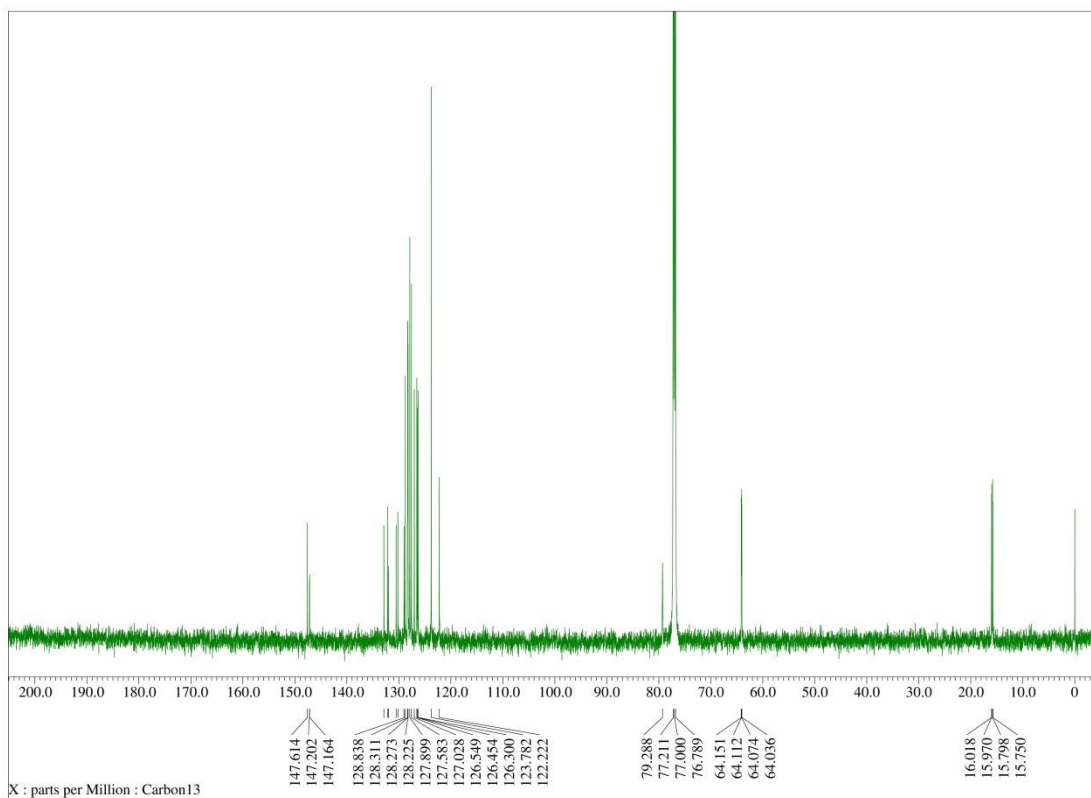

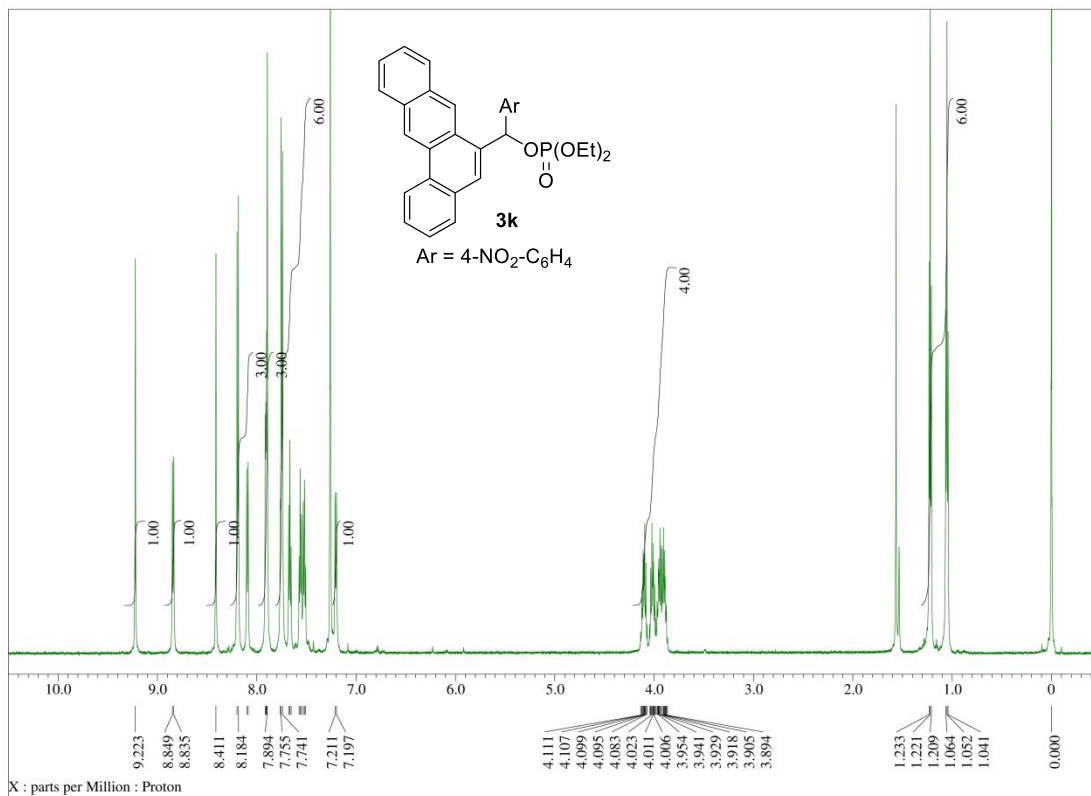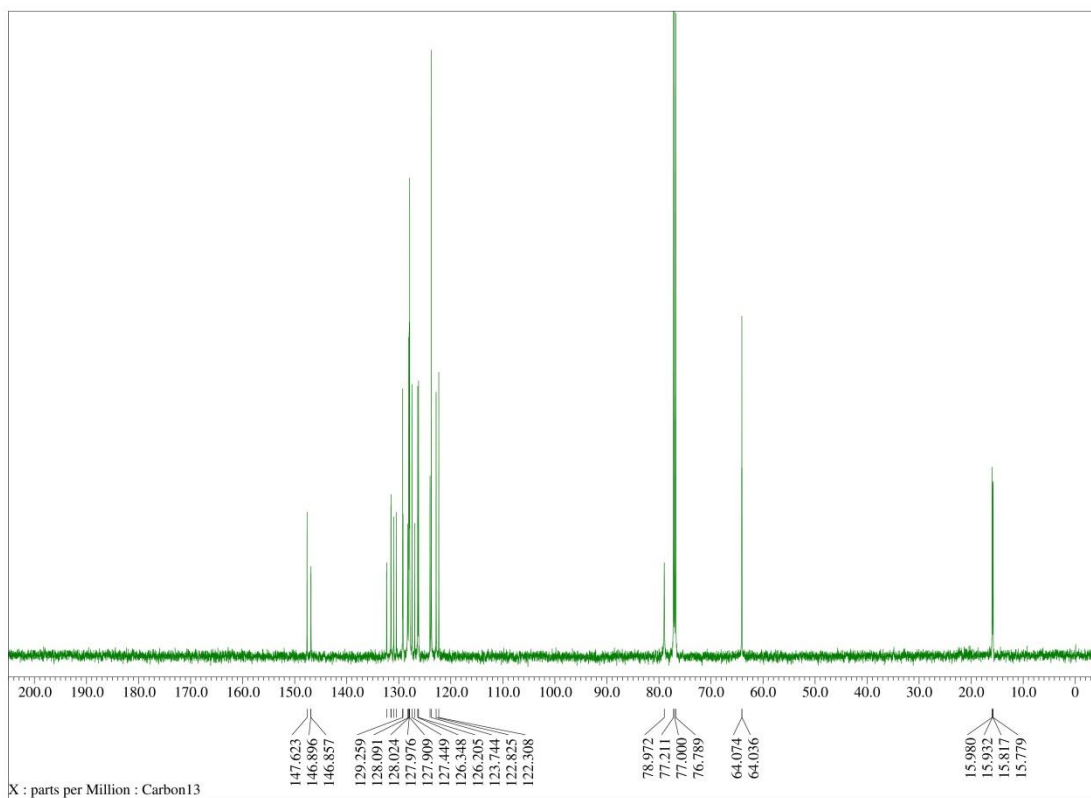

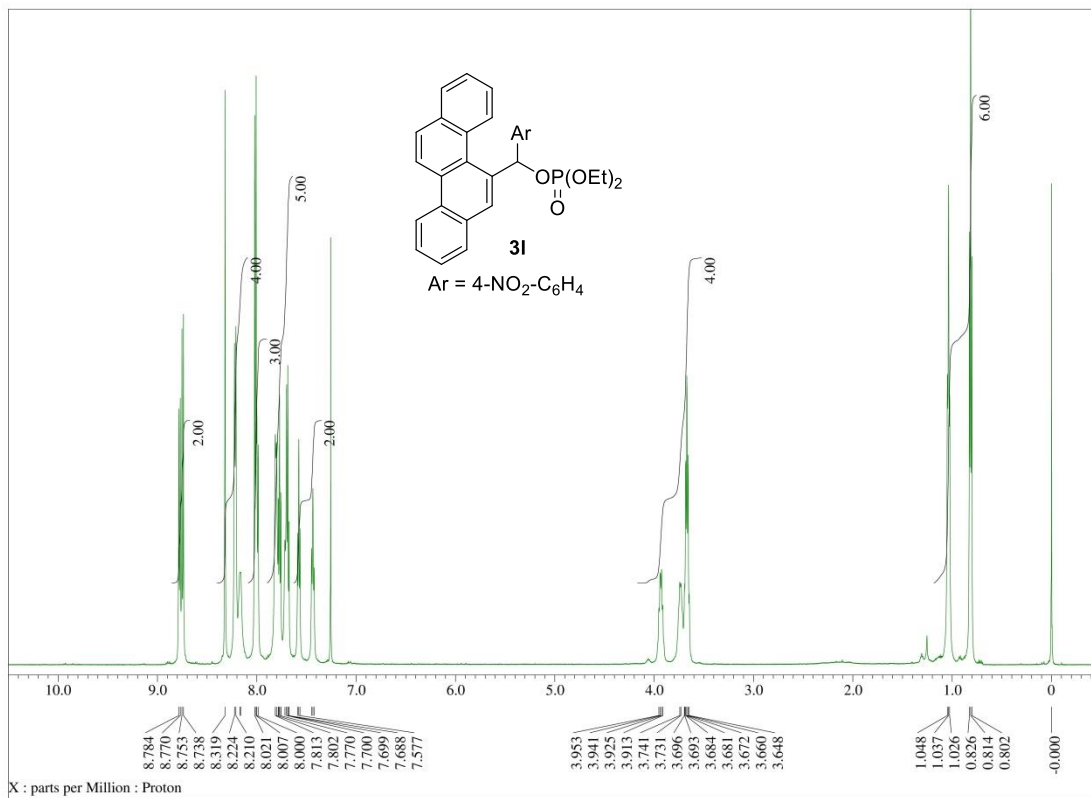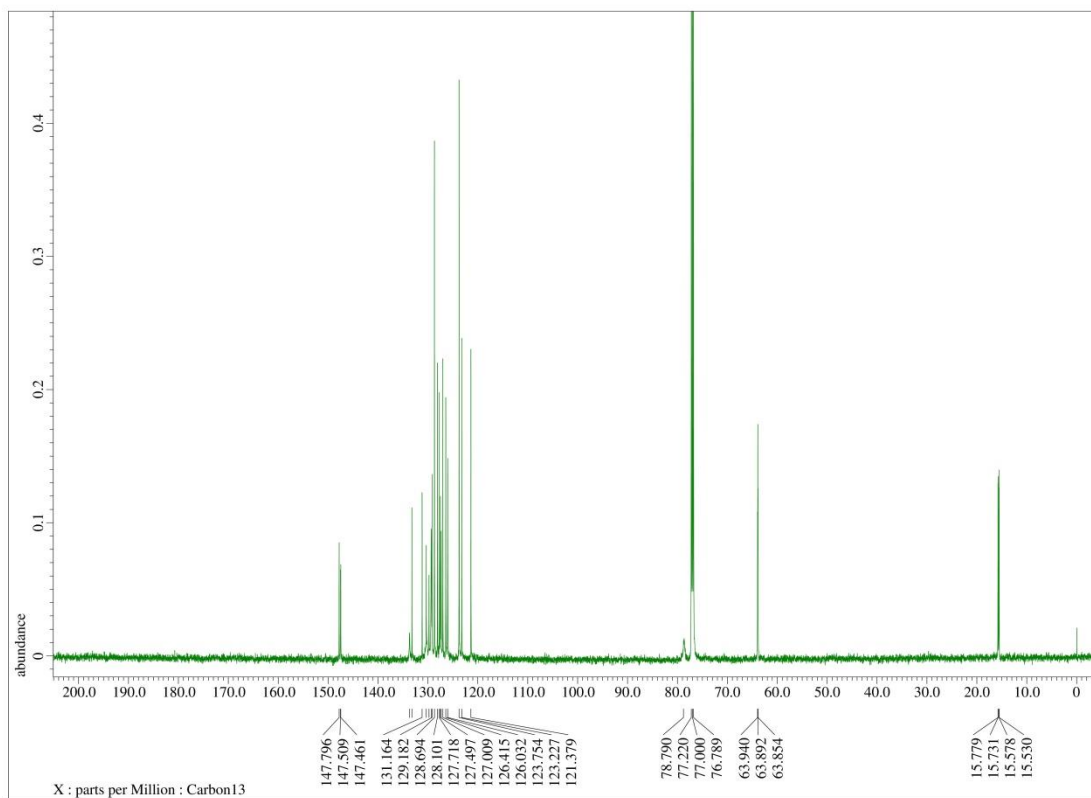

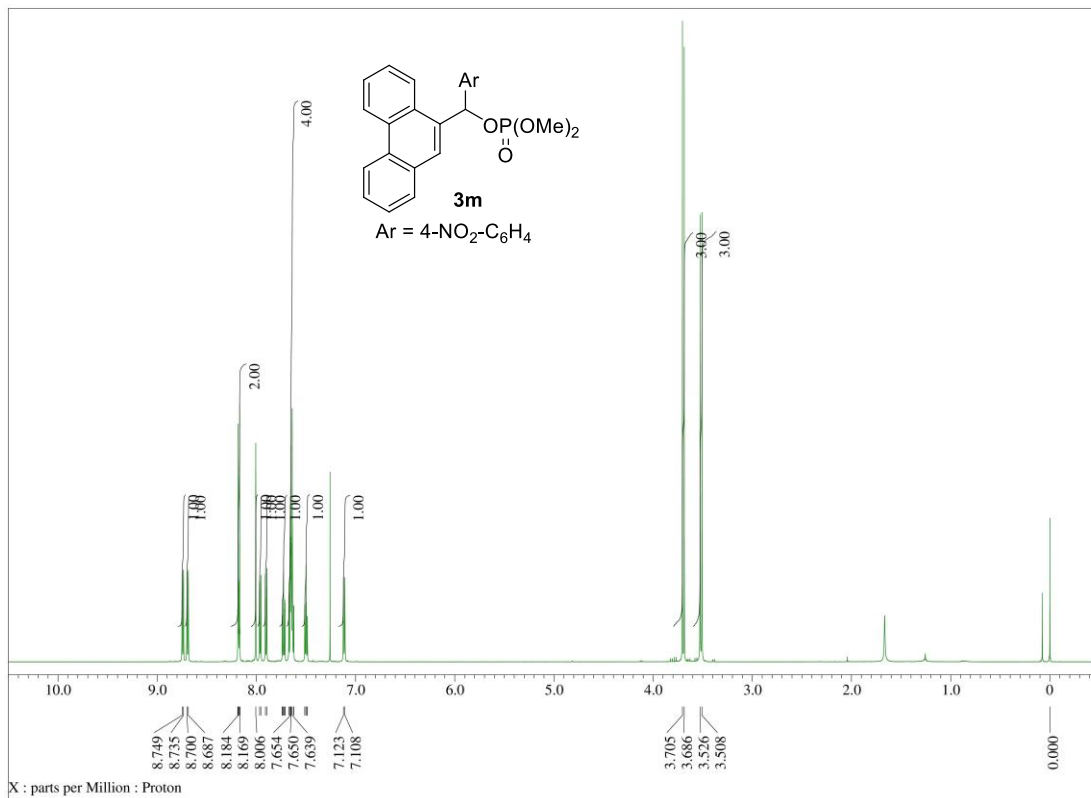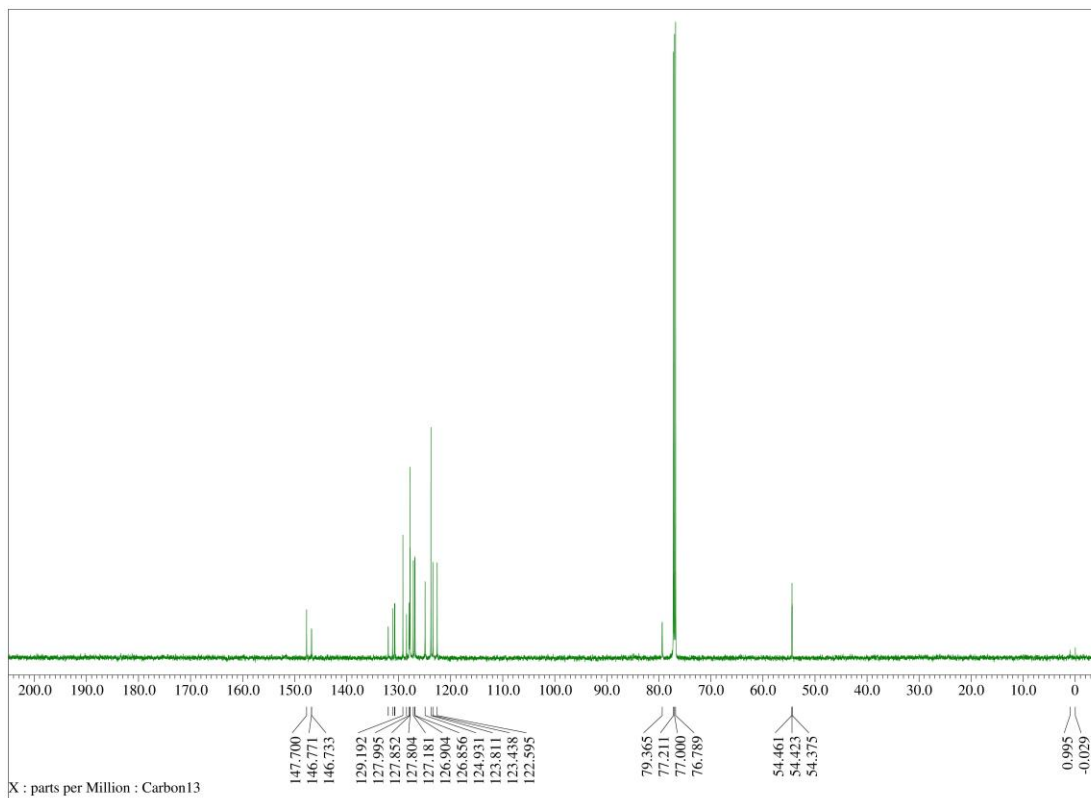



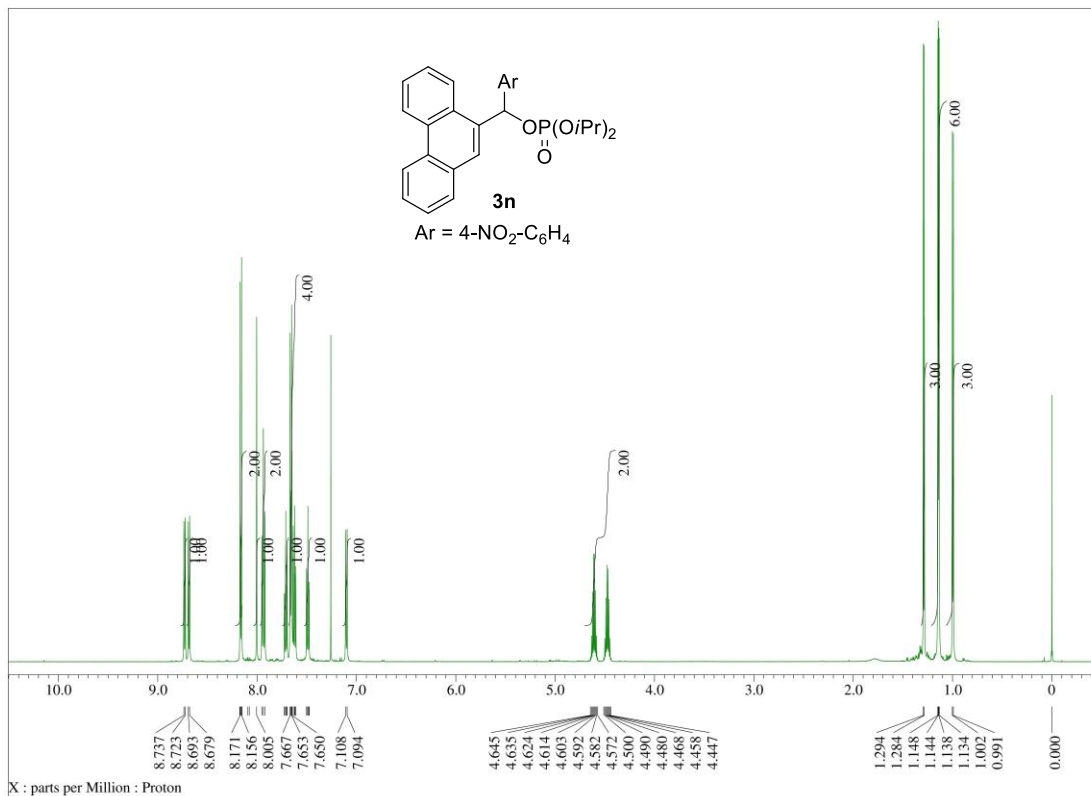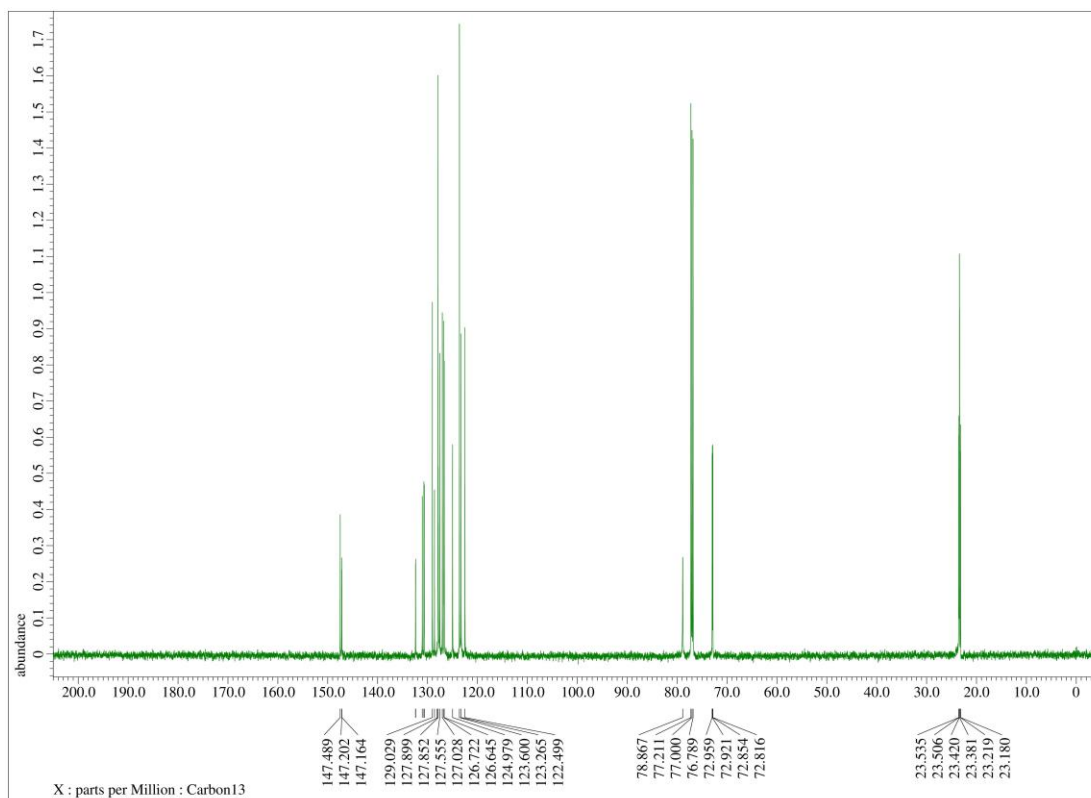

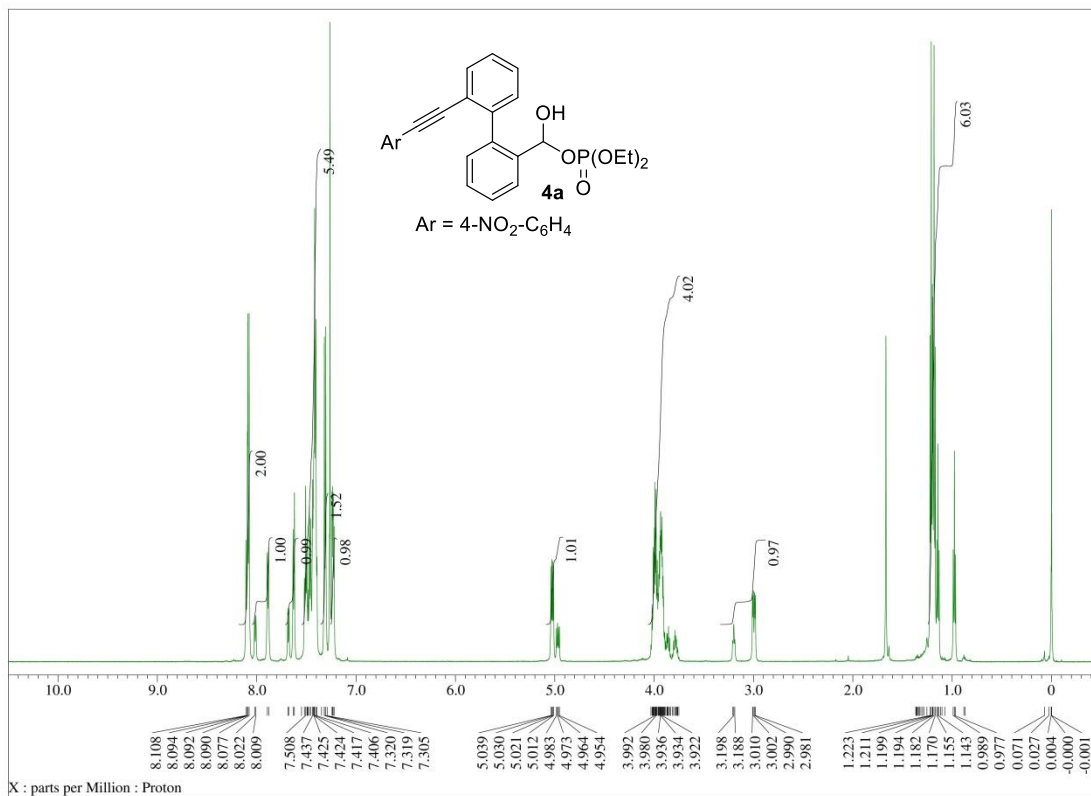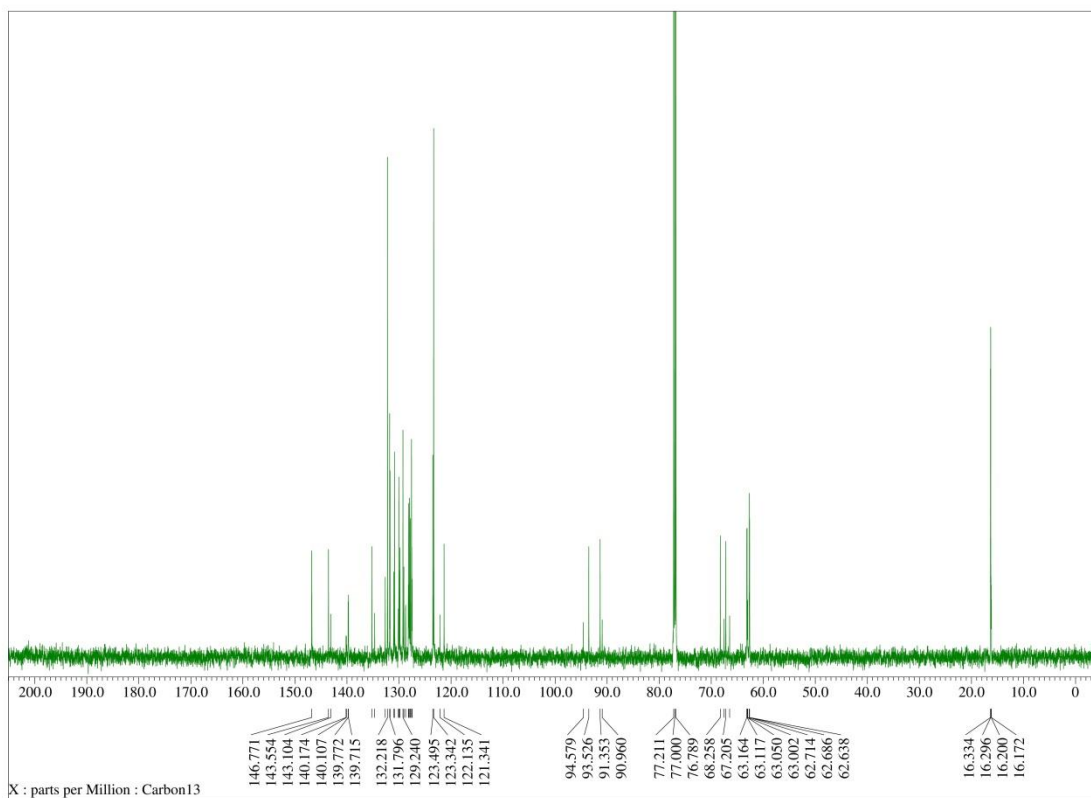

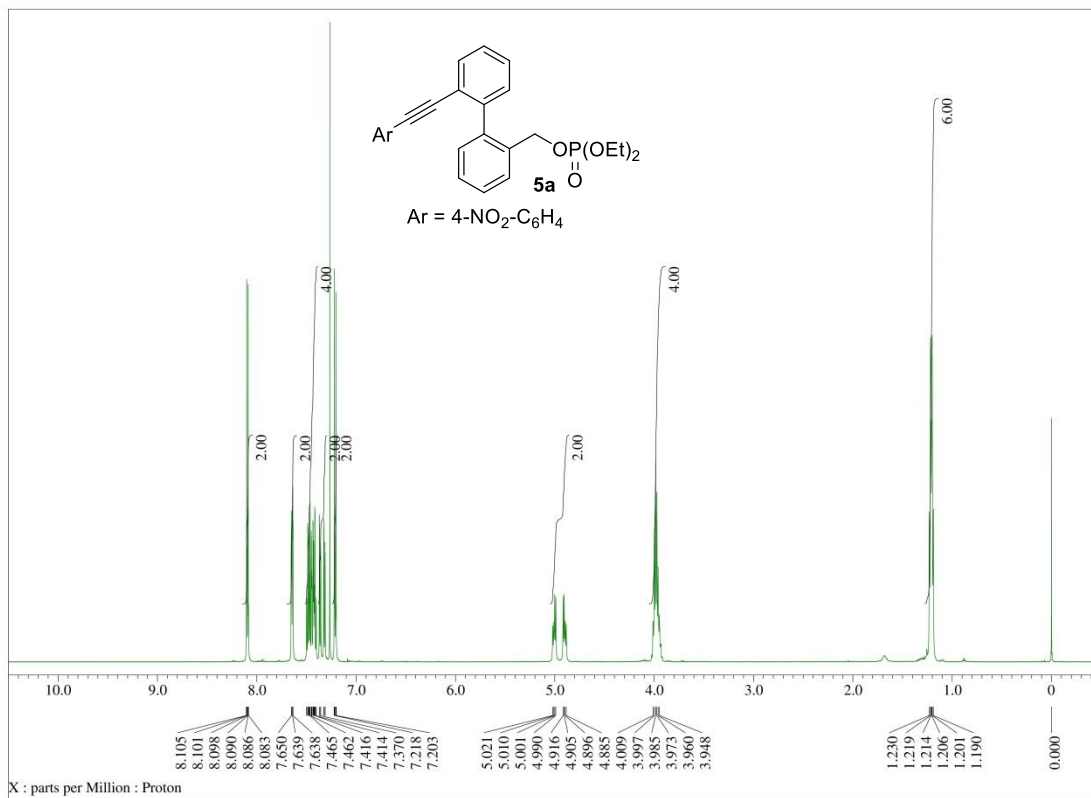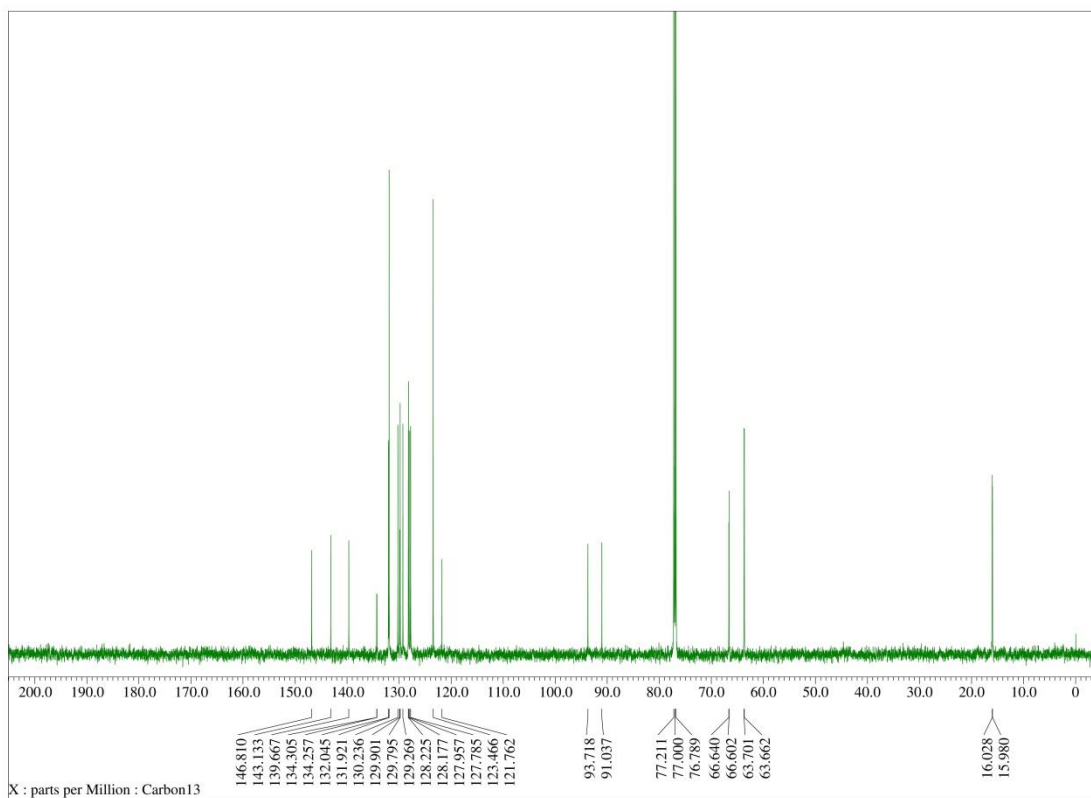

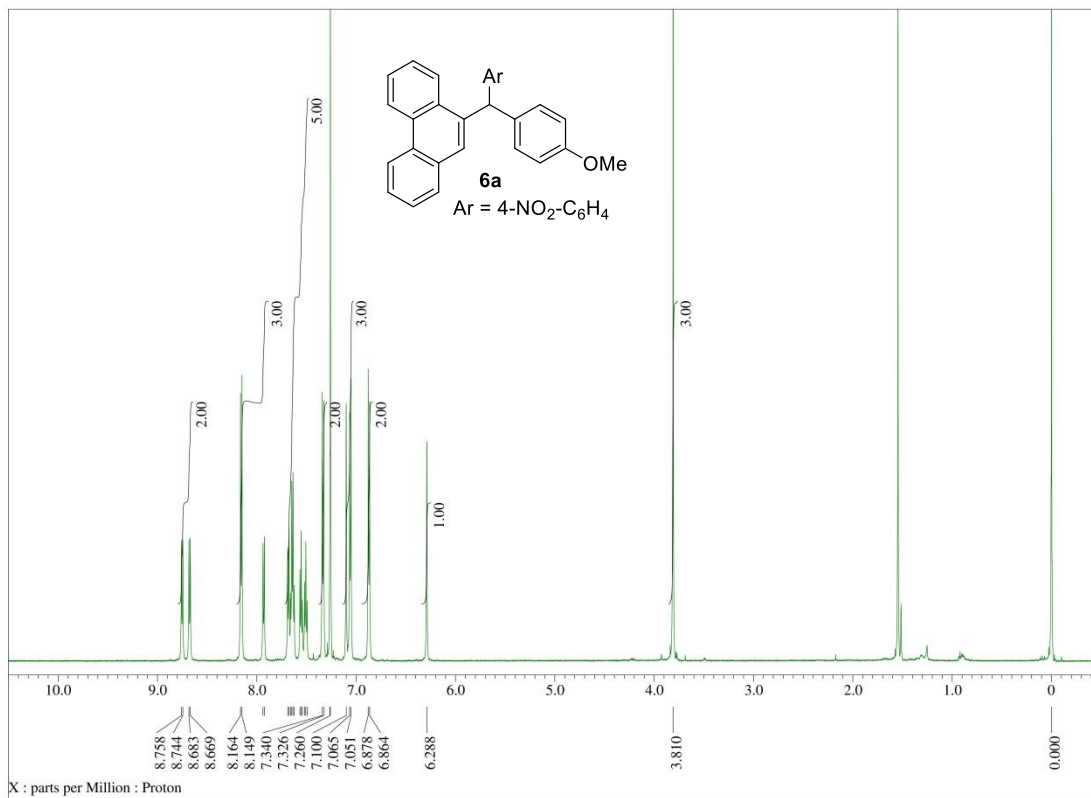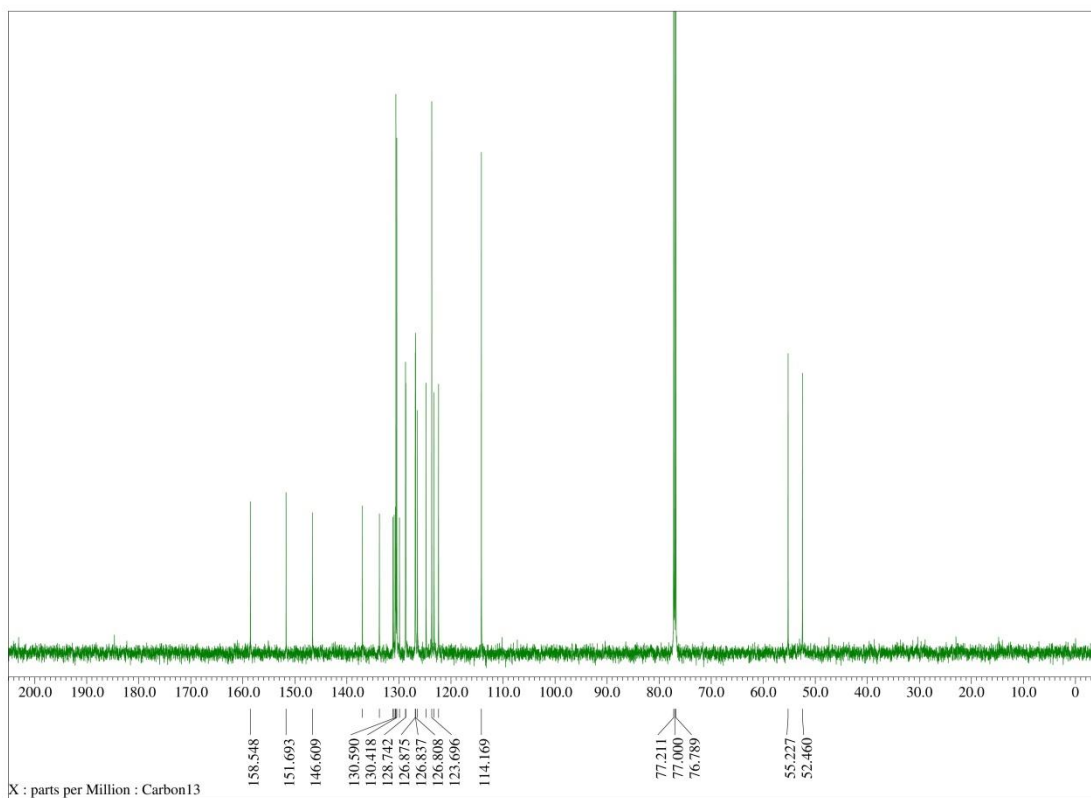

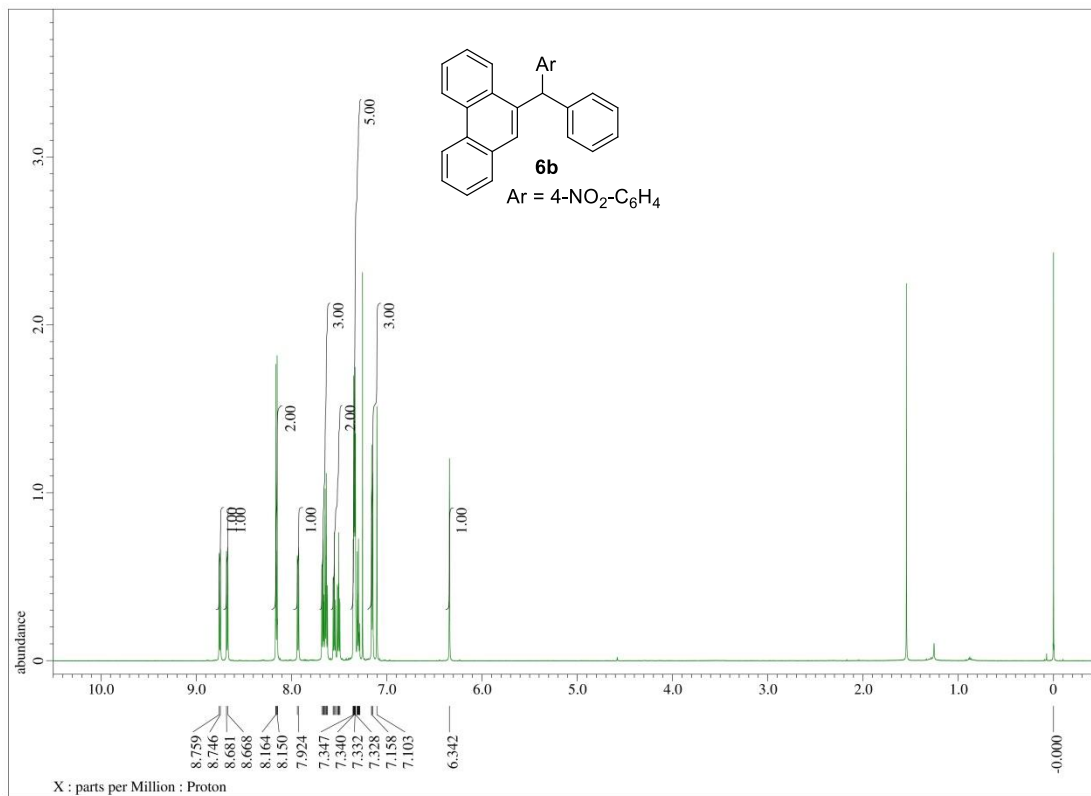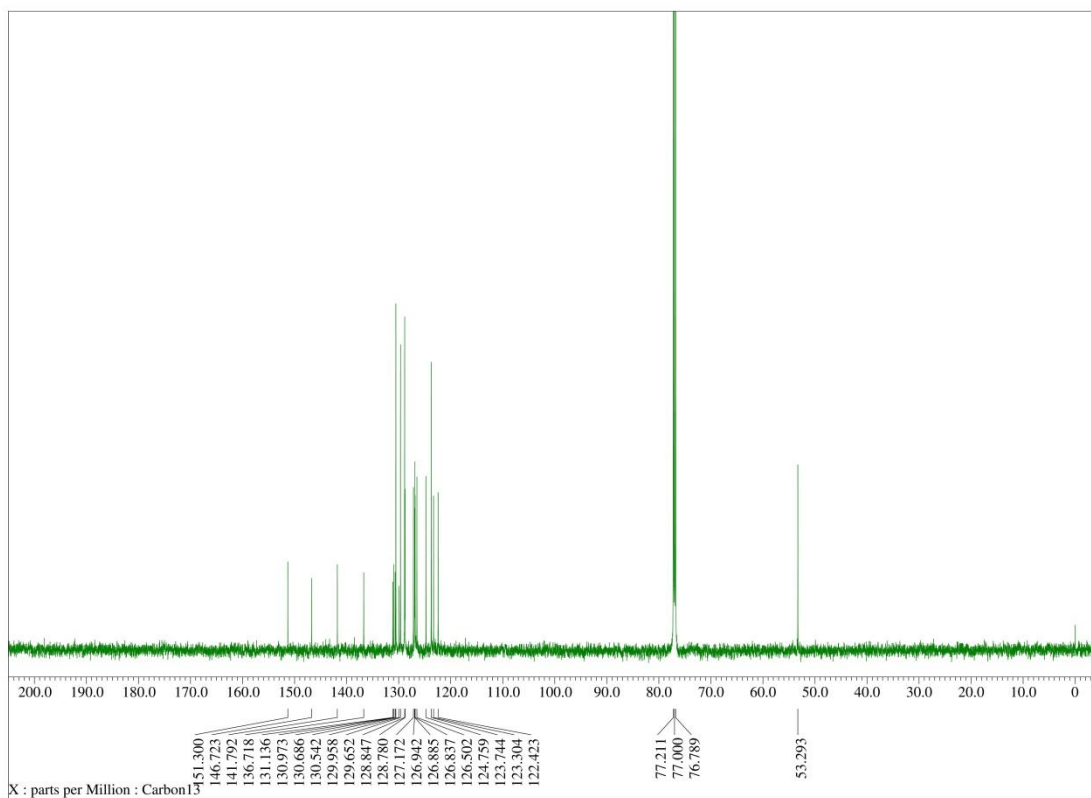

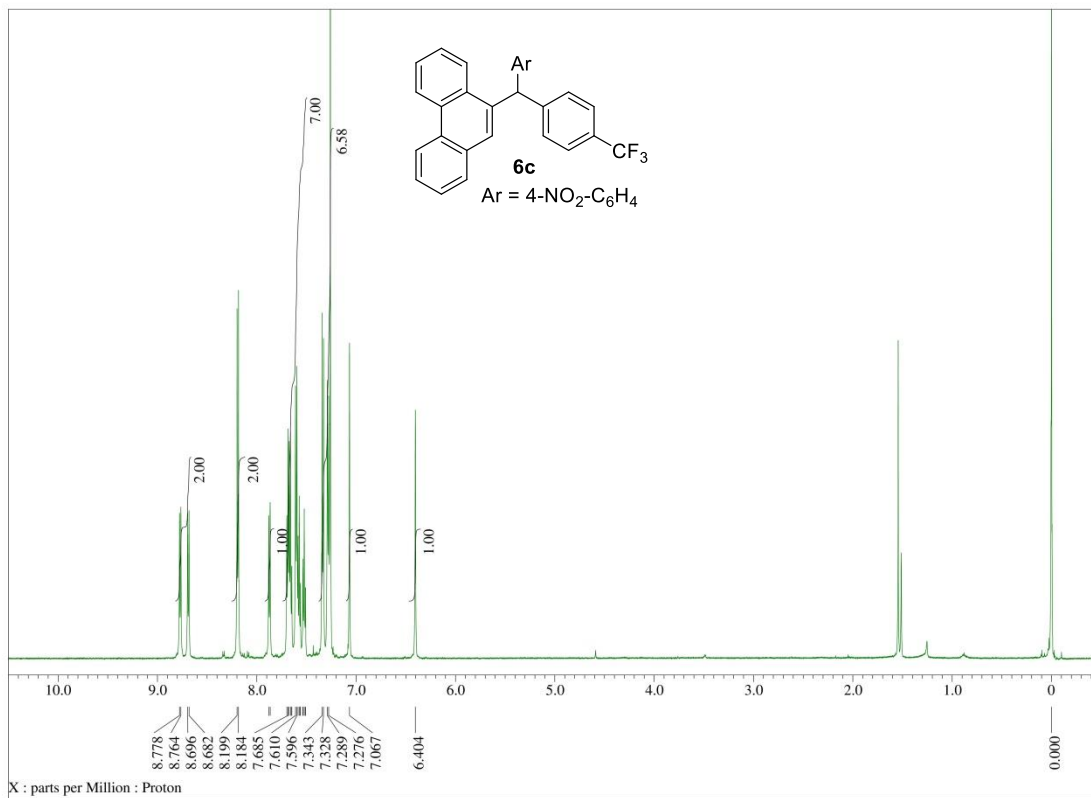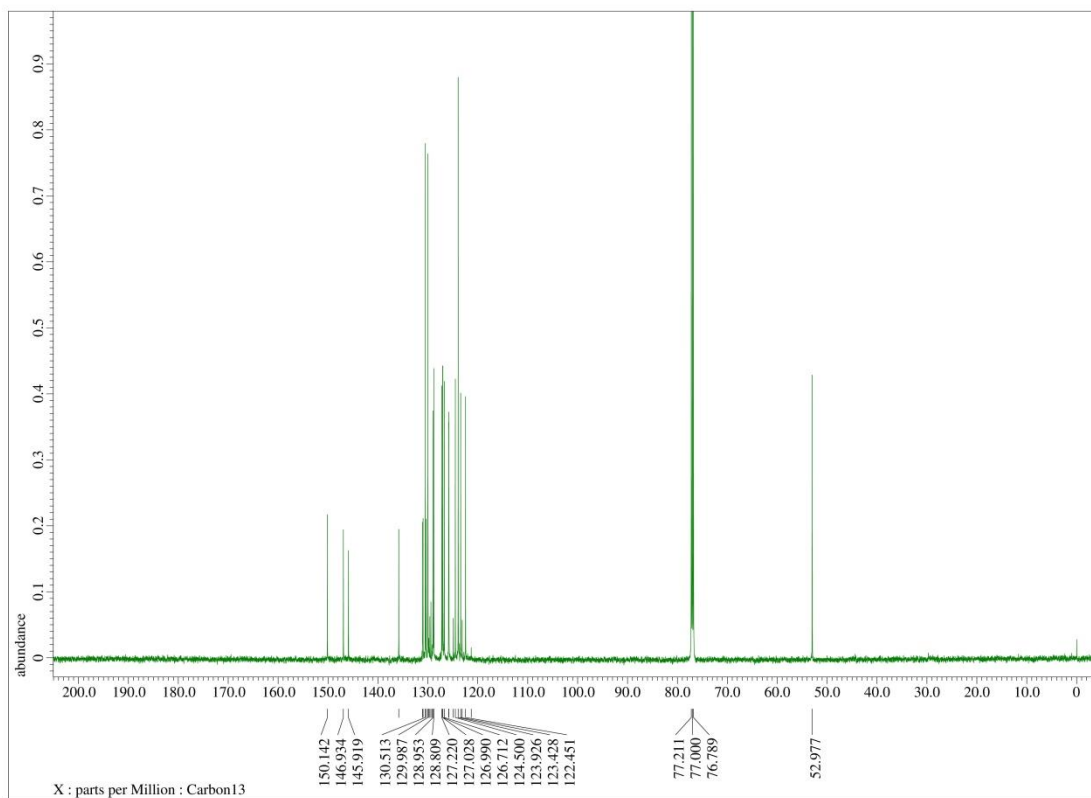

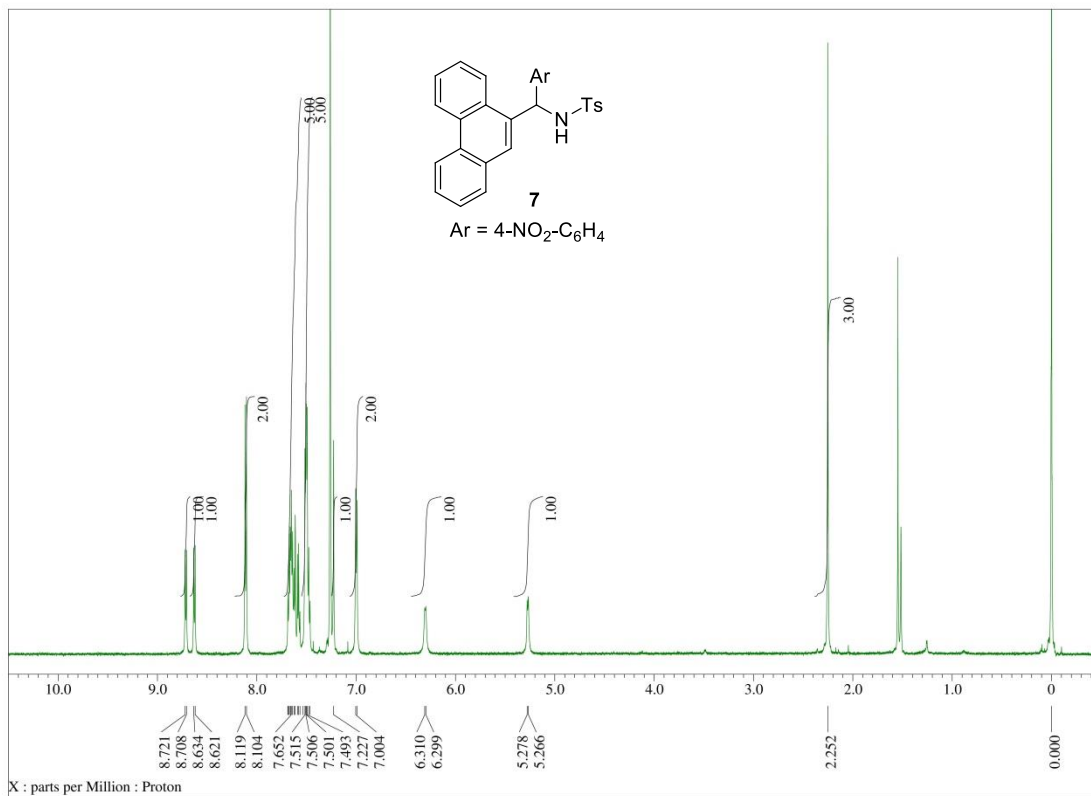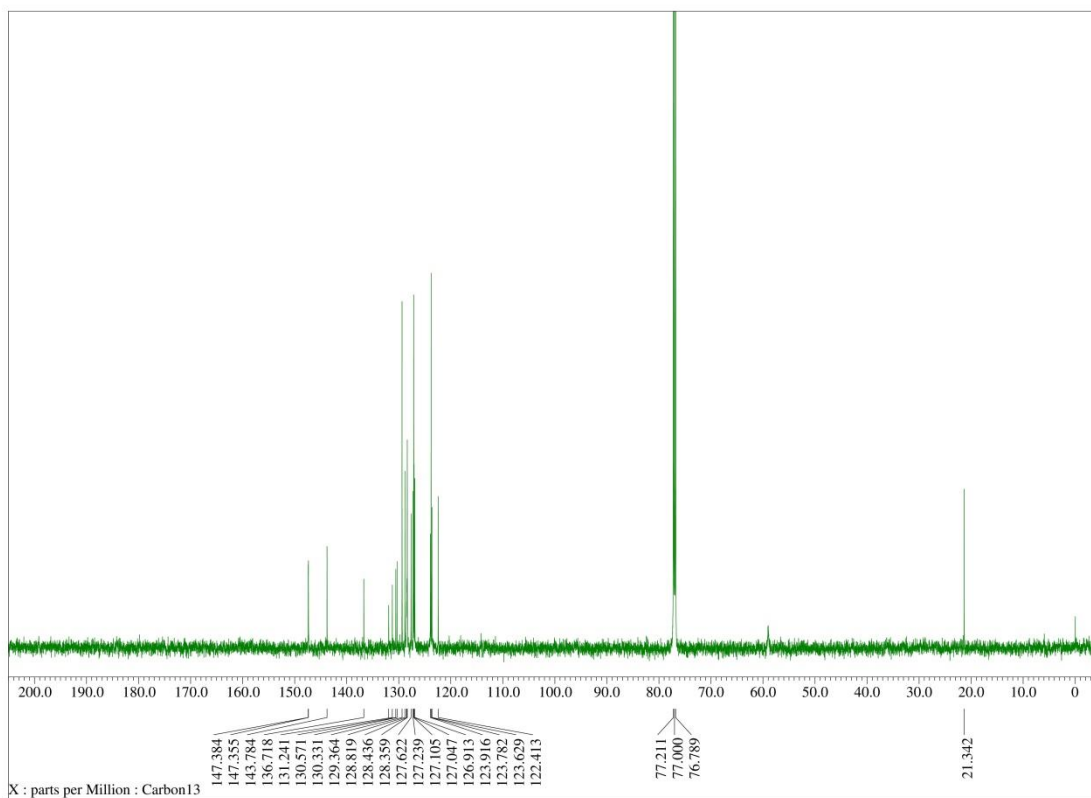

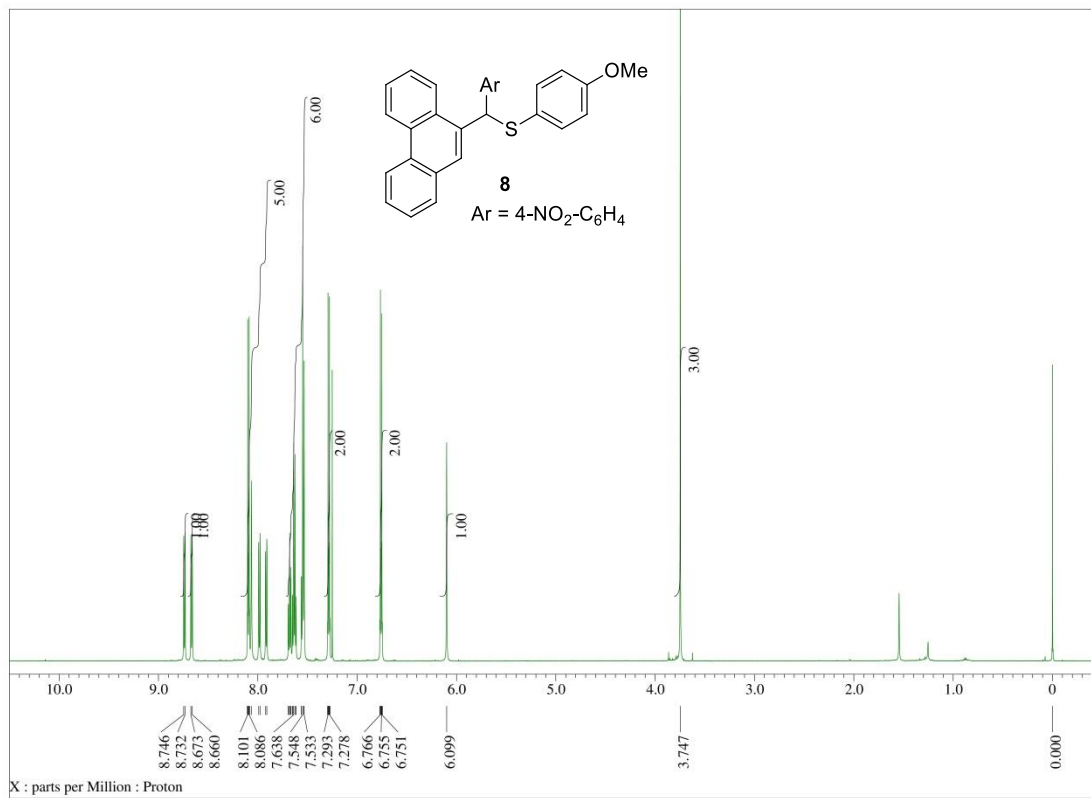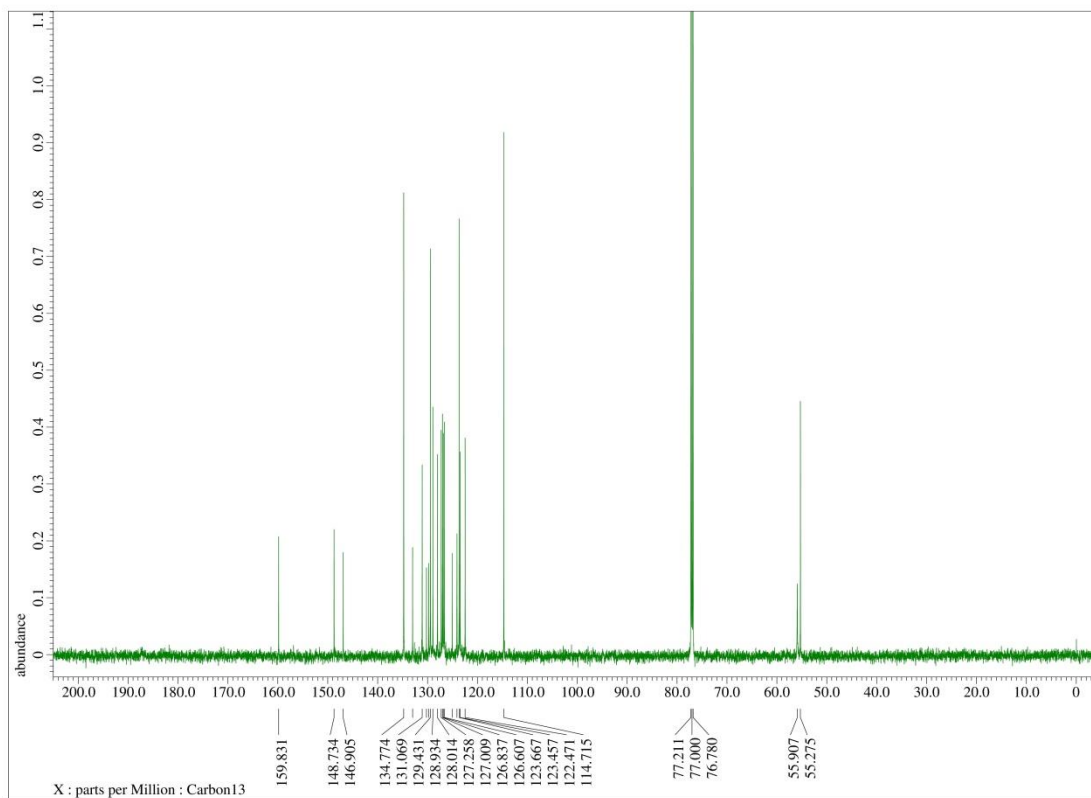

Supplement: c7ob02059g1.pdf [file c7ob02059g1.pdf]
